# Supplementary material
Source: publisher figshare collection journal article supplement (https://acs.figshare.com/ndownloader/files/5179609)
Supplement: Supplementary file 1 [file 5179609]

 
data_2a 
 
_audit_creation_method            SHELXL-97 
_chemical_name_systematic 
; 
 ? 
; 
_chemical_name_common             ? 
_chemical_melting_point           ? 
_chemical_formula_moiety          ? 
_chemical_formula_sum 
 'C9 H14 N2 O2' 
_chemical_formula_weight          182.22 
 
loop_ 
 _atom_type_symbol 
 _atom_type_description 
 _atom_type_scat_dispersion_real 
 _atom_type_scat_dispersion_imag 
 _atom_type_scat_source 
 'C'  'C'    .0033    .0016 
 'International Tables Vol C Tables 4.2.6.8 and 6.1.1.4' 
 'H'  'H'    .0000    .0000 
 'International Tables Vol C Tables 4.2.6.8 and 6.1.1.4' 
 'N'  'N'    .0061    .0033 
 'International Tables Vol C Tables 4.2.6.8 and 6.1.1.4' 
 'O'  'O'    .0106    .0060 
 'International Tables Vol C Tables 4.2.6.8 and 6.1.1.4' 
 
_symmetry_cell_setting            triclinic
_symmetry_space_group_name_H-M    'P -1'
 
loop_ 
 _symmetry_equiv_pos_as_xyz 
 'x, y, z' 
 '-x, -y, -z' 
 
_cell_length_a                    5.7692(3) 
_cell_length_b                    7.9733(4) 
_cell_length_c                    10.1316(5) 
_cell_angle_alpha                 79.224(3) 
_cell_angle_beta                  89.598(3) 
_cell_angle_gamma                 81.603(3) 
_cell_volume                      452.82(4) 
_cell_formula_units_Z             2 
_cell_measurement_temperature     90.0(2) 
_cell_measurement_reflns_used     5494
_cell_measurement_theta_min       1.00
_cell_measurement_theta_max       27.48
 
_exptl_crystal_description        block
_exptl_crystal_colour             colourless
_exptl_crystal_size_max           0.40 
_exptl_crystal_size_mid           0.20 
_exptl_crystal_size_min           0.10 
_exptl_crystal_density_meas       ? 
_exptl_crystal_density_diffrn     1.336 
_exptl_crystal_density_method     'not measured' 
_exptl_crystal_F_000              196 
_exptl_absorpt_coefficient_mu     0.096 
_exptl_absorpt_correction_type    none 
_exptl_absorpt_correction_T_min   ? 
_exptl_absorpt_correction_T_max   ? 
_exptl_absorpt_process_details    ? 
 
_exptl_special_details 
; 
 ? 
; 
 
_diffrn_ambient_temperature       90.0(2) 
_diffrn_radiation_wavelength      0.71073 
_diffrn_radiation_type            MoK\a 
_diffrn_radiation_source          'fine-focus sealed tube' 
_diffrn_radiation_monochromator   graphite 
_diffrn_measurement_device_type   'Nonius KappaCCD diffractometer' 
_diffrn_measurement_method        '\w scans at fixed \c = 55\%'
_diffrn_detector_area_resol_mean  18 
_diffrn_standards_number          ?
_diffrn_standards_interval_count  ? 
_diffrn_standards_interval_time   ? 
_diffrn_standards_decay_%         <1
_diffrn_reflns_number             4095 
_diffrn_reflns_av_R_equivalents   0.0464 
_diffrn_reflns_av_sigmaI/netI     0.0771 
_diffrn_reflns_limit_h_min        -7 
_diffrn_reflns_limit_h_max        7 
_diffrn_reflns_limit_k_min        -10 
_diffrn_reflns_limit_k_max        10 
_diffrn_reflns_limit_l_min        -13 
_diffrn_reflns_limit_l_max        13 
_diffrn_reflns_theta_min          2.05 
_diffrn_reflns_theta_max          27.47 
_reflns_number_total              2066 
_reflns_number_gt                 1486 
_reflns_threshold_expression      >2sigma(I) 
 
_computing_data_collection        'COLLECT (Nonius, 1998)' 
_computing_cell_refinement        'SCALEPACK (Otwinowski & Minor, 1997)'
_computing_data_reduction         'DENZO-SMN (Otwinowski & Minor, 1997)'
_computing_structure_solution     'SHELXS-97 (Sheldrick, 1990)' 
_computing_structure_refinement   'SHELXL-97 (Sheldrick, 1997)' 
_computing_molecular_graphics     'XP in Siemens SHELXTL (Sheldrick, 1994)'
_computing_publication_material   
;
SHELX97-2 (Sheldrick, 1997) and local procedures
;
 
_refine_special_details 
; 
 Refinement of F^2^ against ALL reflections.  The weighted R-factor wR and 
 goodness of fit S are based on F^2^, conventional R-factors R are based 
 on F, with F set to zero for negative F^2^. The threshold expression of 
 F^2^ > 2sigma(F^2^) is used only for calculating R-factors(gt) etc. and is 
 not relevant to the choice of reflections for refinement.  R-factors based 
 on F^2^ are statistically about twice as large as those based on F, and R- 
 factors based on ALL data will be even larger. 
; 
 
_refine_ls_structure_factor_coef  Fsqd  
_refine_ls_matrix_type            full 
_refine_ls_weighting_scheme       calc  
_refine_ls_weighting_details 
 'calc w=1/[\s^2^(Fo^2^)+(0.0394P)^2^+0.1048P] where P=(Fo^2^+2Fc^2^)/3' 
_atom_sites_solution_primary      direct 
_atom_sites_solution_secondary    difmap 
_atom_sites_solution_hydrogens    geom 
_refine_ls_hydrogen_treatment     mixed 
_refine_ls_extinction_method      SHELXL 
_refine_ls_extinction_coef        0.024(6) 
_refine_ls_extinction_expression 
 'Fc^*^=kFc[1+0.001xFc^2^\l^3^/sin(2\q)]^-1/4^' 
_refine_ls_number_reflns          2066 
_refine_ls_number_parameters      121 
_refine_ls_number_restraints      0 
_refine_ls_R_factor_all           0.0835 
_refine_ls_R_factor_gt            0.0511 
_refine_ls_wR_factor_ref          0.1103 
_refine_ls_wR_factor_gt           0.1004 
_refine_ls_goodness_of_fit_ref    1.032 
_refine_ls_restrained_S_all       1.032 
_refine_ls_shift/su_max           0.000 
_refine_ls_shift/su_mean          0.000 
 
loop_ 
 _atom_site_label 
 _atom_site_type_symbol 
 _atom_site_fract_x 
 _atom_site_fract_y 
 _atom_site_fract_z 
 _atom_site_U_iso_or_equiv 
 _atom_site_adp_type 
 _atom_site_occupancy 
 _atom_site_symmetry_multiplicity 
 _atom_site_calc_flag 
 _atom_site_refinement_flags 
 _atom_site_disorder_assembly 
 _atom_site_disorder_group 
C1 C 0.4177(3) 0.8694(2) 0.26793(15) 0.0128(4) Uani 1 1 d . . . 
O2 O 0.2203(2) 0.82168(14) 0.48401(11) 0.0169(3) Uani 1 1 d . . . 
C2 C 0.2602(3) 0.9222(2) 0.38094(16) 0.0138(4) Uani 1 1 d . . . 
N3 N 0.1688(2) 1.09002(16) 0.35130(13) 0.0139(3) Uani 1 1 d . . . 
H3 H 0.0821 1.1405 0.4086 0.017 Uiso 1 1 calc R . . 
C4 C 0.2210(3) 1.1851(2) 0.21844(16) 0.0144(4) Uani 1 1 d . . . 
N5 N 0.1650(2) 1.08397(16) 0.11862(13) 0.0150(4) Uani 1 1 d . . . 
H5 H 0.0774 1.1310 0.0467 0.018 Uiso 1 1 calc R . . 
O6 O 0.2114(2) 0.80999(14) 0.07545(11) 0.0187(3) Uani 1 1 d . . . 
C6 C 0.2551(3) 0.9159(2) 0.14333(16) 0.0141(4) Uani 1 1 d . . . 
C7 C 0.6054(3) 0.9941(2) 0.24493(17) 0.0169(4) Uani 1 1 d . . . 
H7A H 0.7082 0.9740 0.3259 0.020 Uiso 1 1 calc R . . 
H7B H 0.7042 0.9700 0.1684 0.020 Uiso 1 1 calc R . . 
C8 C 0.4873(3) 1.1836(2) 0.21554(16) 0.0159(4) Uani 1 1 d . . . 
H8A H 0.5364 1.2456 0.2842 0.019 Uiso 1 1 calc R . . 
H8B H 0.5334 1.2419 0.1263 0.019 Uiso 1 1 calc R . . 
C9 C 0.5221(3) 0.6789(2) 0.29589(16) 0.0159(4) Uani 1 1 d . . . 
H9A H 0.5894 0.6484 0.2119 0.019 Uiso 1 1 calc R . . 
H9B H 0.3943 0.6095 0.3214 0.019 Uiso 1 1 calc R . . 
C10 C 0.7120(3) 0.6287(2) 0.40619(17) 0.0203(4) Uani 1 1 d . . . 
H10A H 0.8538(14) 0.6801(5) 0.3745(3) 0.030 Uiso 1 1 calc R . . 
H10B H 0.7519(5) 0.5012(13) 0.4281(3) 0.030 Uiso 1 1 calc R . . 
H10C H 0.6536(6) 0.6723(5) 0.4877(8) 0.030 Uiso 1 1 calc R . . 
C11 C 0.0803(3) 1.3635(2) 0.19061(17) 0.0186(4) Uani 1 1 d . . . 
H11A H 0.1241(5) 1.4265(7) 0.1032(9) 0.028 Uiso 1 1 calc R . . 
H11B H 0.1129(4) 1.4261(7) 0.2618(7) 0.028 Uiso 1 1 calc R . . 
H11C H -0.0878(17) 1.3542(2) 0.18867(17) 0.028 Uiso 1 1 calc R . . 
 
loop_ 
 _atom_site_aniso_label 
 _atom_site_aniso_U_11 
 _atom_site_aniso_U_22 
 _atom_site_aniso_U_33 
 _atom_site_aniso_U_23 
 _atom_site_aniso_U_13 
 _atom_site_aniso_U_12 
C1 0.0128(9) 0.0146(9) 0.0123(9) -0.0045(7) -0.0004(7) -0.0031(7) 
O2 0.0177(7) 0.0179(6) 0.0144(6) -0.0009(5) 0.0020(5) -0.0029(5) 
C2 0.0114(9) 0.0182(9) 0.0135(9) -0.0046(7) -0.0020(7) -0.0057(7) 
N3 0.0169(8) 0.0144(8) 0.0120(7) -0.0058(6) 0.0034(6) -0.0033(6) 
C4 0.0157(9) 0.0167(9) 0.0117(9) -0.0033(7) -0.0009(7) -0.0040(7) 
N5 0.0186(8) 0.0160(8) 0.0111(7) -0.0033(6) -0.0032(6) -0.0038(6) 
O6 0.0209(7) 0.0196(7) 0.0174(7) -0.0079(5) -0.0028(5) -0.0035(5) 
C6 0.0117(9) 0.0186(9) 0.0130(9) -0.0039(7) 0.0031(7) -0.0047(7) 
C7 0.0142(9) 0.0219(10) 0.0161(9) -0.0055(7) 0.0011(7) -0.0049(7) 
C8 0.0169(10) 0.0181(9) 0.0137(9) -0.0033(7) 0.0015(7) -0.0059(7) 
C9 0.0166(10) 0.0180(9) 0.0144(9) -0.0061(7) 0.0009(7) -0.0024(7) 
C10 0.0197(10) 0.0192(10) 0.0212(10) -0.0039(8) -0.0020(8) -0.0008(8) 
C11 0.0197(10) 0.0175(10) 0.0196(9) -0.0042(8) -0.0003(8) -0.0049(8) 
 
_geom_special_details 
; 
 All esds (except the esd in the dihedral angle between two l.s. planes) 
 are estimated using the full covariance matrix.  The cell esds are taken 
 into account individually in the estimation of esds in distances, angles 
 and torsion angles; correlations between esds in cell parameters are only 
 used when they are defined by crystal symmetry.  An approximate (isotropic) 
 treatment of cell esds is used for estimating esds involving l.s. planes. 
; 
 
loop_ 
 _geom_bond_atom_site_label_1 
 _geom_bond_atom_site_label_2 
 _geom_bond_distance 
 _geom_bond_site_symmetry_2 
 _geom_bond_publ_flag 
C1 C9 1.524(2) . ? 
C1 C6 1.533(2) . ? 
C1 C2 1.539(2) . ? 
C1 C7 1.562(2) . ? 
O2 C2 1.2340(19) . ? 
C2 N3 1.343(2) . ? 
N3 C4 1.469(2) . ? 
N3 H3 0.8800 . ? 
C4 N5 1.471(2) . ? 
C4 C11 1.509(2) . ? 
C4 C8 1.535(2) . ? 
N5 C6 1.342(2) . ? 
N5 H5 0.8800 . ? 
O6 C6 1.2373(18) . ? 
C7 C8 1.540(2) . ? 
C7 H7A 0.9900 . ? 
C7 H7B 0.9900 . ? 
C8 H8A 0.9900 . ? 
C8 H8B 0.9900 . ? 
C9 C10 1.526(2) . ? 
C9 H9A 0.9900 . ? 
C9 H9B 0.9900 . ? 
C10 H10A 0.9924 . ? 
C10 H10B 0.9924 . ? 
C10 H10C 0.9924 . ? 
C11 H11A 0.9839 . ? 
C11 H11B 0.9839 . ? 
C11 H11C 0.9839 . ? 
 
loop_ 
 _geom_angle_atom_site_label_1 
 _geom_angle_atom_site_label_2 
 _geom_angle_atom_site_label_3 
 _geom_angle 
 _geom_angle_site_symmetry_1 
 _geom_angle_site_symmetry_3 
 _geom_angle_publ_flag 
C9 C1 C6 111.95(13) . . ? 
C9 C1 C2 113.18(13) . . ? 
C6 C1 C2 103.81(13) . . ? 
C9 C1 C7 113.69(13) . . ? 
C6 C1 C7 106.74(13) . . ? 
C2 C1 C7 106.76(13) . . ? 
O2 C2 N3 124.76(15) . . ? 
O2 C2 C1 123.99(14) . . ? 
N3 C2 C1 111.23(14) . . ? 
C2 N3 C4 116.68(13) . . ? 
C2 N3 H3 121.7 . . ? 
C4 N3 H3 121.7 . . ? 
N3 C4 N5 107.29(12) . . ? 
N3 C4 C11 111.04(13) . . ? 
N5 C4 C11 110.89(13) . . ? 
N3 C4 C8 106.67(13) . . ? 
N5 C4 C8 106.51(13) . . ? 
C11 C4 C8 114.07(14) . . ? 
C6 N5 C4 116.25(13) . . ? 
C6 N5 H5 121.9 . . ? 
C4 N5 H5 121.9 . . ? 
O6 C6 N5 124.62(15) . . ? 
O6 C6 C1 123.68(14) . . ? 
N5 C6 C1 111.70(13) . . ? 
C8 C7 C1 110.73(13) . . ? 
C8 C7 H7A 109.5 . . ? 
C1 C7 H7A 109.5 . . ? 
C8 C7 H7B 109.5 . . ? 
C1 C7 H7B 109.5 . . ? 
H7A C7 H7B 108.1 . . ? 
C4 C8 C7 107.91(13) . . ? 
C4 C8 H8A 110.1 . . ? 
C7 C8 H8A 110.1 . . ? 
C4 C8 H8B 110.1 . . ? 
C7 C8 H8B 110.1 . . ? 
H8A C8 H8B 108.4 . . ? 
C1 C9 C10 114.75(13) . . ? 
C1 C9 H9A 108.6 . . ? 
C10 C9 H9A 108.6 . . ? 
C1 C9 H9B 108.6 . . ? 
C10 C9 H9B 108.6 . . ? 
H9A C9 H9B 107.6 . . ? 
C9 C10 H10A 109.5 . . ? 
C9 C10 H10B 109.5 . . ? 
H10A C10 H10B 109.5 . . ? 
C9 C10 H10C 109.5 . . ? 
H10A C10 H10C 109.5 . . ? 
H10B C10 H10C 109.5 . . ? 
C4 C11 H11A 109.5 . . ? 
C4 C11 H11B 109.5 . . ? 
H11A C11 H11B 109.5 . . ? 
C4 C11 H11C 109.5 . . ? 
H11A C11 H11C 109.5 . . ? 
H11B C11 H11C 109.5 . . ? 
 
loop_ 
 _geom_torsion_atom_site_label_1 
 _geom_torsion_atom_site_label_2 
 _geom_torsion_atom_site_label_3 
 _geom_torsion_atom_site_label_4 
 _geom_torsion 
 _geom_torsion_site_symmetry_1 
 _geom_torsion_site_symmetry_2 
 _geom_torsion_site_symmetry_3 
 _geom_torsion_site_symmetry_4 
 _geom_torsion_publ_flag 
C9 C1 C2 O2 -0.2(2) . . . . ? 
C6 C1 C2 O2 121.37(16) . . . . ? 
C7 C1 C2 O2 -126.06(16) . . . . ? 
C9 C1 C2 N3 -178.97(13) . . . . ? 
C6 C1 C2 N3 -57.36(16) . . . . ? 
C7 C1 C2 N3 55.20(17) . . . . ? 
O2 C2 N3 C4 -174.86(15) . . . . ? 
C1 C2 N3 C4 3.86(19) . . . . ? 
C2 N3 C4 N5 50.44(18) . . . . ? 
C2 N3 C4 C11 171.77(13) . . . . ? 
C2 N3 C4 C8 -63.38(17) . . . . ? 
N3 C4 N5 C6 -49.82(18) . . . . ? 
C11 C4 N5 C6 -171.24(14) . . . . ? 
C8 C4 N5 C6 64.11(17) . . . . ? 
C4 N5 C6 O6 174.37(15) . . . . ? 
C4 N5 C6 C1 -4.88(19) . . . . ? 
C9 C1 C6 O6 1.2(2) . . . . ? 
C2 C1 C6 O6 -121.23(17) . . . . ? 
C7 C1 C6 O6 126.19(16) . . . . ? 
C9 C1 C6 N5 -179.54(13) . . . . ? 
C2 C1 C6 N5 58.04(16) . . . . ? 
C7 C1 C6 N5 -54.55(17) . . . . ? 
C9 C1 C7 C8 179.26(13) . . . . ? 
C6 C1 C7 C8 55.32(17) . . . . ? 
C2 C1 C7 C8 -55.21(16) . . . . ? 
N3 C4 C8 C7 57.24(15) . . . . ? 
N5 C4 C8 C7 -57.12(15) . . . . ? 
C11 C4 C8 C7 -179.79(13) . . . . ? 
C1 C7 C8 C4 -0.21(17) . . . . ? 
C6 C1 C9 C10 171.75(14) . . . . ? 
C2 C1 C9 C10 -71.35(18) . . . . ? 
C7 C1 C9 C10 50.69(19) . . . . ? 
 
_diffrn_measured_fraction_theta_max     .996 
_diffrn_reflns_theta_full              27.47 
_diffrn_measured_fraction_theta_full    .996 
_refine_diff_density_max     .282 
_refine_diff_density_min    -.282 
_refine_diff_density_rms     .053 

#===END

 
 
data_2b 
 
_audit_creation_method            SHELXL-97 
_chemical_name_systematic 
; 
 ? 
; 
_chemical_name_common             ? 
_chemical_melting_point           ? 
_chemical_formula_moiety          ? 
_chemical_formula_sum 
 'C11 H18 N2 O2' 
_chemical_formula_weight          210.27 
 
loop_ 
 _atom_type_symbol 
 _atom_type_description 
 _atom_type_scat_dispersion_real 
 _atom_type_scat_dispersion_imag 
 _atom_type_scat_source 
 'C'  'C'   0.0033   0.0016 
 'International Tables Vol C Tables 4.2.6.8 and 6.1.1.4' 
 'H'  'H'   0.0000   0.0000 
 'International Tables Vol C Tables 4.2.6.8 and 6.1.1.4' 
 'N'  'N'   0.0061   0.0033 
 'International Tables Vol C Tables 4.2.6.8 and 6.1.1.4' 
 'O'  'O'   0.0106   0.0060 
 'International Tables Vol C Tables 4.2.6.8 and 6.1.1.4' 
 
_symmetry_cell_setting            triclinic
_symmetry_space_group_name_H-M    'P -1'
 
loop_ 
 _symmetry_equiv_pos_as_xyz 
 'x, y, z' 
 '-x, -y, -z' 
 
_cell_length_a                    6.0180(4) 
_cell_length_b                    9.7880(7) 
_cell_length_c                    9.9340(8) 
_cell_angle_alpha                 108.985(4) 
_cell_angle_beta                  90.136(4) 
_cell_angle_gamma                 96.233(4) 
_cell_volume                      549.61(7) 
_cell_formula_units_Z             2 
_cell_measurement_temperature     90.0(2) 
_cell_measurement_reflns_used     4720 
_cell_measurement_theta_min       1.00
_cell_measurement_theta_max       27.48
 
_exptl_crystal_description        block
_exptl_crystal_colour             colourless
_exptl_crystal_size_max           0.32 
_exptl_crystal_size_mid           0.30 
_exptl_crystal_size_min           0.15 
_exptl_crystal_density_meas       ? 
_exptl_crystal_density_diffrn     1.271 
_exptl_crystal_density_method     'not measured' 
_exptl_crystal_F_000              228 
_exptl_absorpt_coefficient_mu     0.088 
_exptl_absorpt_correction_type    multi-scan
_exptl_absorpt_correction_T_min   0.9724 
_exptl_absorpt_correction_T_max   0.9869 
_exptl_absorpt_process_details    'Scalepack (Otwinowski & Minor 1997)'
 
_exptl_special_details 
; 
 ? 
; 
 
_diffrn_ambient_temperature       90.0(2) 
_diffrn_radiation_wavelength      0.71073 
_diffrn_radiation_type            MoK\a 
_diffrn_radiation_source          'fine-focus sealed tube' 
_diffrn_radiation_monochromator   graphite 
_diffrn_measurement_device_type   'Nonius KappaCCD diffractometer' 
_diffrn_measurement_method        '\w scans at fixed \c = 55\%'
_diffrn_detector_area_resol_mean  18 
_diffrn_standards_number          ?
_diffrn_standards_interval_count  ? 
_diffrn_standards_interval_time   ? 
_diffrn_standards_decay_%         <1
_diffrn_reflns_number             3865 
_diffrn_reflns_av_R_equivalents   0.0320 
_diffrn_reflns_av_sigmaI/netI     0.0734 
_diffrn_reflns_limit_h_min        -7 
_diffrn_reflns_limit_h_max        7 
_diffrn_reflns_limit_k_min        -12 
_diffrn_reflns_limit_k_max        12 
_diffrn_reflns_limit_l_min        -9 
_diffrn_reflns_limit_l_max        12 
_diffrn_reflns_theta_min          2.17 
_diffrn_reflns_theta_max          27.51 
_reflns_number_total              2515 
_reflns_number_gt                 1789 
_reflns_threshold_expression      >2sigma(I) 
 
_computing_data_collection        'COLLECT (Nonius, 1998)' 
_computing_cell_refinement        'SCALEPACK (Otwinowski & Minor, 1997)'
_computing_data_reduction         'DENZO-SMN (Otwinowski & Minor, 1997)'
_computing_structure_solution     'SHELXS-97 (Sheldrick, 1990)' 
_computing_structure_refinement   'SHELXL-97 (Sheldrick, 1997)' 
_computing_molecular_graphics     'XP in Siemens SHELXTL (Sheldrick, 1994)'
_computing_publication_material   
;
SHELX97-2 (Sheldrick, 1997) and local procedures
;
 
_refine_special_details 
; 
 Refinement of F^2^ against ALL reflections.  The weighted R-factor wR and 
 goodness of fit S are based on F^2^, conventional R-factors R are based 
 on F, with F set to zero for negative F^2^. The threshold expression of 
 F^2^ > 2sigma(F^2^) is used only for calculating R-factors(gt) etc. and is 
 not relevant to the choice of reflections for refinement.  R-factors based 
 on F^2^ are statistically about twice as large as those based on F, and R- 
 factors based on ALL data will be even larger. 
; 
 
_refine_ls_structure_factor_coef  Fsqd  
_refine_ls_matrix_type            full 
_refine_ls_weighting_scheme       calc  
_refine_ls_weighting_details 
 'calc w=1/[\s^2^(Fo^2^)+(0.0351P)^2^+0.2533P] where P=(Fo^2^+2Fc^2^)/3' 
_atom_sites_solution_primary      direct 
_atom_sites_solution_secondary    difmap 
_atom_sites_solution_hydrogens    geom 
_refine_ls_hydrogen_treatment     mixed 
_refine_ls_extinction_method      SHELXL 
_refine_ls_extinction_coef        0.013(4) 
_refine_ls_extinction_expression 
 'Fc^*^=kFc[1+0.001xFc^2^\l^3^/sin(2\q)]^-1/4^' 
_refine_ls_number_reflns          2515 
_refine_ls_number_parameters      140 
_refine_ls_number_restraints      0 
_refine_ls_R_factor_all           0.0789 
_refine_ls_R_factor_gt            0.0492 
_refine_ls_wR_factor_ref          0.1104 
_refine_ls_wR_factor_gt           0.0987 
_refine_ls_goodness_of_fit_ref    0.972 
_refine_ls_restrained_S_all       0.972 
_refine_ls_shift/su_max           0.004 
_refine_ls_shift/su_mean          0.001 
 
loop_ 
 _atom_site_label 
 _atom_site_type_symbol 
 _atom_site_fract_x 
 _atom_site_fract_y 
 _atom_site_fract_z 
 _atom_site_U_iso_or_equiv 
 _atom_site_adp_type 
 _atom_site_occupancy 
 _atom_site_symmetry_multiplicity 
 _atom_site_calc_flag 
 _atom_site_refinement_flags 
 _atom_site_disorder_assembly 
 _atom_site_disorder_group 
C1 C 0.3884(3) 0.12880(17) 0.28920(17) 0.0137(4) Uani 1 1 d . . . 
O2 O 0.18443(19) 0.17148(12) 0.50955(12) 0.0194(3) Uani 1 1 d . . . 
C2 C 0.2348(3) 0.08531(18) 0.39536(17) 0.0149(4) Uani 1 1 d . . . 
N3 N 0.1627(2) -0.05787(14) 0.34750(14) 0.0164(3) Uani 1 1 d . . . 
H3 H 0.0782 -0.0996 0.3986 0.020 Uiso 1 1 calc R . . 
C4 C 0.2324(3) -0.14084(17) 0.20566(17) 0.0156(4) Uani 1 1 d . . . 
N5 N 0.1781(2) -0.06398(14) 0.10750(14) 0.0154(3) Uani 1 1 d . . . 
H5 H 0.1046 -0.1092 0.0256 0.018 Uiso 1 1 calc R . . 
O6 O 0.19803(18) 0.16198(12) 0.08616(12) 0.0171(3) Uani 1 1 d . . . 
C6 C 0.2471(3) 0.07952(17) 0.14986(17) 0.0136(4) Uani 1 1 d . . . 
C7 C 0.5826(3) 0.03049(17) 0.26712(18) 0.0170(4) Uani 1 1 d . . . 
H7A H 0.6844 0.0504 0.1959 0.020 Uiso 1 1 calc R . . 
H7B H 0.6698 0.0539 0.3580 0.020 Uiso 1 1 calc R . . 
C8 C 0.4887(3) -0.13199(18) 0.21562(18) 0.0171(4) Uani 1 1 d . . . 
H8A H 0.5463 -0.1822 0.1212 0.020 Uiso 1 1 calc R . . 
H8B H 0.5349 -0.1793 0.2837 0.020 Uiso 1 1 calc R . . 
C9 C 0.1110(3) -0.29322(18) 0.15808(19) 0.0205(4) Uani 1 1 d . . . 
H9A H 0.1421 -0.3411 0.2276 0.031 Uiso 1 1 calc R . . 
H9B H 0.1626 -0.3487 0.0648 0.031 Uiso 1 1 calc R . . 
H9C H -0.0503 -0.2886 0.1510 0.031 Uiso 1 1 calc R . . 
C10 C 0.4655(3) 0.29169(17) 0.34016(17) 0.0154(4) Uani 1 1 d . . . 
H10A H 0.5402 0.3185 0.4356 0.018 Uiso 1 1 calc R . . 
H10B H 0.3319 0.3445 0.3509 0.018 Uiso 1 1 calc R . . 
C11 C 0.6272(3) 0.34410(18) 0.24137(18) 0.0166(4) Uani 1 1 d . . . 
H11 H 0.6336 0.2614 0.1508 0.020 Uiso 1 1 calc R . . 
C12 C 0.8628(3) 0.38917(19) 0.3092(2) 0.0241(4) Uani 1 1 d . . . 
H12A H 0.9661 0.4077 0.2394 0.036 Uiso 1 1 calc R . . 
H12B H 0.9100 0.3110 0.3401 0.036 Uiso 1 1 calc R . . 
H12C H 0.8637 0.4778 0.3917 0.036 Uiso 1 1 calc R . . 
C13 C 0.5419(3) 0.47002(19) 0.2049(2) 0.0228(4) Uani 1 1 d . . . 
H13A H 0.5351 0.5525 0.2924 0.034 Uiso 1 1 calc R . . 
H13B H 0.3922 0.4388 0.1591 0.034 Uiso 1 1 calc R . . 
H13C H 0.6439 0.4994 0.1399 0.034 Uiso 1 1 calc R . . 
 
loop_ 
 _atom_site_aniso_label 
 _atom_site_aniso_U_11 
 _atom_site_aniso_U_22 
 _atom_site_aniso_U_33 
 _atom_site_aniso_U_23 
 _atom_site_aniso_U_13 
 _atom_site_aniso_U_12 
C1 0.0123(8) 0.0158(8) 0.0131(8) 0.0051(7) 0.0008(7) 0.0013(6) 
O2 0.0220(7) 0.0203(7) 0.0149(6) 0.0049(5) 0.0038(5) 0.0008(5) 
C2 0.0129(8) 0.0186(9) 0.0141(8) 0.0064(7) -0.0023(7) 0.0028(7) 
N3 0.0182(8) 0.0165(7) 0.0160(7) 0.0077(6) 0.0050(6) 0.0012(6) 
C4 0.0179(9) 0.0154(9) 0.0153(8) 0.0071(7) 0.0016(7) 0.0034(7) 
N5 0.0173(8) 0.0155(7) 0.0133(7) 0.0051(6) -0.0024(6) 0.0009(6) 
O6 0.0169(6) 0.0180(6) 0.0179(6) 0.0084(5) -0.0024(5) 0.0009(5) 
C6 0.0099(8) 0.0175(9) 0.0136(8) 0.0049(7) 0.0029(7) 0.0026(6) 
C7 0.0134(8) 0.0209(9) 0.0180(9) 0.0081(7) -0.0018(7) 0.0027(7) 
C8 0.0164(9) 0.0196(9) 0.0177(8) 0.0087(7) 0.0024(7) 0.0053(7) 
C9 0.0228(10) 0.0172(9) 0.0215(9) 0.0065(8) 0.0020(8) 0.0019(7) 
C10 0.0131(8) 0.0182(9) 0.0143(8) 0.0044(7) -0.0004(7) 0.0021(7) 
C11 0.0162(9) 0.0165(9) 0.0160(8) 0.0042(7) 0.0005(7) 0.0006(7) 
C12 0.0175(9) 0.0257(10) 0.0297(10) 0.0106(8) 0.0006(8) -0.0006(7) 
C13 0.0229(10) 0.0225(10) 0.0253(10) 0.0107(8) 0.0045(8) 0.0039(7) 
 
_geom_special_details 
; 
 All esds (except the esd in the dihedral angle between two l.s. planes) 
 are estimated using the full covariance matrix.  The cell esds are taken 
 into account individually in the estimation of esds in distances, angles 
 and torsion angles; correlations between esds in cell parameters are only 
 used when they are defined by crystal symmetry.  An approximate (isotropic) 
 treatment of cell esds is used for estimating esds involving l.s. planes. 
; 
 
loop_ 
 _geom_bond_atom_site_label_1 
 _geom_bond_atom_site_label_2 
 _geom_bond_distance 
 _geom_bond_site_symmetry_2 
 _geom_bond_publ_flag 
C1 C10 1.525(2) . ? 
C1 C6 1.531(2) . ? 
C1 C2 1.536(2) . ? 
C1 C7 1.565(2) . ? 
O2 C2 1.2347(19) . ? 
C2 N3 1.346(2) . ? 
N3 C4 1.467(2) . ? 
N3 H3 0.8800 . ? 
C4 N5 1.467(2) . ? 
C4 C9 1.512(2) . ? 
C4 C8 1.536(2) . ? 
N5 C6 1.345(2) . ? 
N5 H5 0.8800 . ? 
O6 C6 1.2337(19) . ? 
C7 C8 1.544(2) . ? 
C7 H7A 0.9900 . ? 
C7 H7B 0.9900 . ? 
C8 H8A 0.9900 . ? 
C8 H8B 0.9900 . ? 
C9 H9A 0.9800 . ? 
C9 H9B 0.9800 . ? 
C9 H9C 0.9800 . ? 
C10 C11 1.548(2) . ? 
C10 H10A 0.9900 . ? 
C10 H10B 0.9900 . ? 
C11 C12 1.525(2) . ? 
C11 C13 1.530(2) . ? 
C11 H11 1.0000 . ? 
C12 H12A 0.9800 . ? 
C12 H12B 0.9800 . ? 
C12 H12C 0.9800 . ? 
C13 H13A 0.9800 . ? 
C13 H13B 0.9800 . ? 
C13 H13C 0.9800 . ? 
 
loop_ 
 _geom_angle_atom_site_label_1 
 _geom_angle_atom_site_label_2 
 _geom_angle_atom_site_label_3 
 _geom_angle 
 _geom_angle_site_symmetry_1 
 _geom_angle_site_symmetry_3 
 _geom_angle_publ_flag 
C10 C1 C6 112.48(13) . . ? 
C10 C1 C2 111.78(13) . . ? 
C6 C1 C2 104.36(12) . . ? 
C10 C1 C7 114.40(13) . . ? 
C6 C1 C7 107.45(13) . . ? 
C2 C1 C7 105.66(13) . . ? 
O2 C2 N3 124.79(15) . . ? 
O2 C2 C1 123.94(14) . . ? 
N3 C2 C1 111.28(14) . . ? 
C2 N3 C4 116.56(13) . . ? 
C2 N3 H3 121.7 . . ? 
C4 N3 H3 121.7 . . ? 
N5 C4 N3 107.57(13) . . ? 
N5 C4 C9 110.45(13) . . ? 
N3 C4 C9 110.14(13) . . ? 
N5 C4 C8 106.80(13) . . ? 
N3 C4 C8 106.49(13) . . ? 
C9 C4 C8 115.04(14) . . ? 
C6 N5 C4 116.16(13) . . ? 
C6 N5 H5 121.9 . . ? 
C4 N5 H5 121.9 . . ? 
O6 C6 N5 124.21(15) . . ? 
O6 C6 C1 124.09(14) . . ? 
N5 C6 C1 111.68(14) . . ? 
C8 C7 C1 110.65(13) . . ? 
C8 C7 H7A 109.5 . . ? 
C1 C7 H7A 109.5 . . ? 
C8 C7 H7B 109.5 . . ? 
C1 C7 H7B 109.5 . . ? 
H7A C7 H7B 108.1 . . ? 
C4 C8 C7 107.69(13) . . ? 
C4 C8 H8A 110.2 . . ? 
C7 C8 H8A 110.2 . . ? 
C4 C8 H8B 110.2 . . ? 
C7 C8 H8B 110.2 . . ? 
H8A C8 H8B 108.5 . . ? 
C4 C9 H9A 109.5 . . ? 
C4 C9 H9B 109.5 . . ? 
H9A C9 H9B 109.5 . . ? 
C4 C9 H9C 109.5 . . ? 
H9A C9 H9C 109.5 . . ? 
H9B C9 H9C 109.5 . . ? 
C1 C10 C11 115.13(14) . . ? 
C1 C10 H10A 108.5 . . ? 
C11 C10 H10A 108.5 . . ? 
C1 C10 H10B 108.5 . . ? 
C11 C10 H10B 108.5 . . ? 
H10A C10 H10B 107.5 . . ? 
C12 C11 C13 110.29(14) . . ? 
C12 C11 C10 111.10(14) . . ? 
C13 C11 C10 110.78(14) . . ? 
C12 C11 H11 108.2 . . ? 
C13 C11 H11 108.2 . . ? 
C10 C11 H11 108.2 . . ? 
C11 C12 H12A 109.5 . . ? 
C11 C12 H12B 109.5 . . ? 
H12A C12 H12B 109.5 . . ? 
C11 C12 H12C 109.5 . . ? 
H12A C12 H12C 109.5 . . ? 
H12B C12 H12C 109.5 . . ? 
C11 C13 H13A 109.5 . . ? 
C11 C13 H13B 109.5 . . ? 
H13A C13 H13B 109.5 . . ? 
C11 C13 H13C 109.5 . . ? 
H13A C13 H13C 109.5 . . ? 
H13B C13 H13C 109.5 . . ? 
 
loop_ 
 _geom_torsion_atom_site_label_1 
 _geom_torsion_atom_site_label_2 
 _geom_torsion_atom_site_label_3 
 _geom_torsion_atom_site_label_4 
 _geom_torsion 
 _geom_torsion_site_symmetry_1 
 _geom_torsion_site_symmetry_2 
 _geom_torsion_site_symmetry_3 
 _geom_torsion_site_symmetry_4 
 _geom_torsion_publ_flag 
C10 C1 C2 O2 -1.6(2) . . . . ? 
C6 C1 C2 O2 -123.42(16) . . . . ? 
C7 C1 C2 O2 123.42(16) . . . . ? 
C10 C1 C2 N3 178.27(13) . . . . ? 
C6 C1 C2 N3 56.45(17) . . . . ? 
C7 C1 C2 N3 -56.70(17) . . . . ? 
O2 C2 N3 C4 177.05(15) . . . . ? 
C1 C2 N3 C4 -2.83(19) . . . . ? 
C2 N3 C4 N5 -51.02(18) . . . . ? 
C2 N3 C4 C9 -171.45(14) . . . . ? 
C2 N3 C4 C8 63.18(17) . . . . ? 
N3 C4 N5 C6 49.65(18) . . . . ? 
C9 C4 N5 C6 169.89(13) . . . . ? 
C8 C4 N5 C6 -64.35(17) . . . . ? 
C4 N5 C6 O6 -173.29(14) . . . . ? 
C4 N5 C6 C1 5.08(19) . . . . ? 
C10 C1 C6 O6 -0.8(2) . . . . ? 
C2 C1 C6 O6 120.54(16) . . . . ? 
C7 C1 C6 O6 -127.60(16) . . . . ? 
C10 C1 C6 N5 -179.19(13) . . . . ? 
C2 C1 C6 N5 -57.83(16) . . . . ? 
C7 C1 C6 N5 54.04(16) . . . . ? 
C10 C1 C7 C8 -179.98(13) . . . . ? 
C6 C1 C7 C8 -54.34(17) . . . . ? 
C2 C1 C7 C8 56.64(17) . . . . ? 
N5 C4 C8 C7 57.74(16) . . . . ? 
N3 C4 C8 C7 -56.98(16) . . . . ? 
C9 C4 C8 C7 -179.31(14) . . . . ? 
C1 C7 C8 C4 -0.74(18) . . . . ? 
C6 C1 C10 C11 -64.78(18) . . . . ? 
C2 C1 C10 C11 178.20(13) . . . . ? 
C7 C1 C10 C11 58.18(19) . . . . ? 
C1 C10 C11 C12 -109.46(16) . . . . ? 
C1 C10 C11 C13 127.59(16) . . . . ? 
 
_diffrn_measured_fraction_theta_max    0.998 
_diffrn_reflns_theta_full              27.51 
_diffrn_measured_fraction_theta_full   0.998 
_refine_diff_density_max    0.367 
_refine_diff_density_min   -0.302 
_refine_diff_density_rms    0.053 

#===END

data_2c 
 
_audit_creation_method            SHELXL-97 
_chemical_name_systematic 
; 
 ? 
; 
_chemical_name_common             ? 
_chemical_melting_point           ? 
_chemical_formula_moiety          ? 
_chemical_formula_sum 
 'C12 H12 N2 O2' 
_chemical_formula_weight          216.24 
 
loop_ 
 _atom_type_symbol 
 _atom_type_description 
 _atom_type_scat_dispersion_real 
 _atom_type_scat_dispersion_imag 
 _atom_type_scat_source 
 'C'  'C'   0.0033   0.0016 
 'International Tables Vol C Tables 4.2.6.8 and 6.1.1.4' 
 'H'  'H'   0.0000   0.0000 
 'International Tables Vol C Tables 4.2.6.8 and 6.1.1.4' 
 'N'  'N'   0.0061   0.0033 
 'International Tables Vol C Tables 4.2.6.8 and 6.1.1.4' 
 'O'  'O'   0.0106   0.0060 
 'International Tables Vol C Tables 4.2.6.8 and 6.1.1.4' 
 
_symmetry_cell_setting            triclinic
_symmetry_space_group_name_H-M    'P -1'
 
loop_ 
 _symmetry_equiv_pos_as_xyz 
 'x, y, z' 
 '-x, -y, -z' 
 
_cell_length_a                    6.92500(10) 
_cell_length_b                    7.7000(2) 
_cell_length_c                    10.4730(2) 
_cell_angle_alpha                 104.6480(9) 
_cell_angle_beta                  103.7130(9) 
_cell_angle_gamma                 91.7510(9) 
_cell_volume                      522.456(18) 
_cell_formula_units_Z             2 
_cell_measurement_temperature     90.0(2) 
_cell_measurement_reflns_used     2360 
_cell_measurement_theta_min       1.00
_cell_measurement_theta_max       27.48
 
_exptl_crystal_description        block
_exptl_crystal_colour             colourless
_exptl_crystal_size_max           0.20 
_exptl_crystal_size_mid           0.10 
_exptl_crystal_size_min           0.10 
_exptl_crystal_density_meas       ? 
_exptl_crystal_density_diffrn     1.375 
_exptl_crystal_density_method     'not measured' 
_exptl_crystal_F_000              228 
_exptl_absorpt_coefficient_mu     0.096 
_exptl_absorpt_correction_type    multi-scan
_exptl_absorpt_correction_T_min   0.9811 
_exptl_absorpt_correction_T_max   0.9905 
_exptl_absorpt_process_details    'Scalepack (Otwinowski & Minor, 1997)'
 
_exptl_special_details 
; 
 ? 
; 
 
_diffrn_ambient_temperature       90.0(2) 
_diffrn_radiation_wavelength      0.71073 
_diffrn_radiation_type            MoK\a 
_diffrn_radiation_source          'fine-focus sealed tube' 
_diffrn_radiation_monochromator   graphite 
_diffrn_measurement_device_type   'Nonius KappaCCD diffractometer' 
_diffrn_measurement_method        '\w scans at fixed \c = 55\%'
_diffrn_detector_area_resol_mean  18 
_diffrn_standards_number          ?
_diffrn_standards_interval_count  ? 
_diffrn_standards_interval_time   ? 
_diffrn_standards_decay_%         <1
_diffrn_reflns_number             4715 
_diffrn_reflns_av_R_equivalents   0.0369 
_diffrn_reflns_av_sigmaI/netI     0.0582 
_diffrn_reflns_limit_h_min        -8 
_diffrn_reflns_limit_h_max        8 
_diffrn_reflns_limit_k_min        -9 
_diffrn_reflns_limit_k_max        9 
_diffrn_reflns_limit_l_min        -13 
_diffrn_reflns_limit_l_max        13 
_diffrn_reflns_theta_min          2.08 
_diffrn_reflns_theta_max          27.43 
_reflns_number_total              2370 
_reflns_number_gt                 1637 
_reflns_threshold_expression      >2\s(I) 
 
_computing_data_collection        'COLLECT (Nonius, 1998)' 
_computing_cell_refinement        'SCALEPACK (Otwinowski & Minor, 1997)'
_computing_data_reduction         'DENZO-SMN (Otwinowski & Minor, 1997)'
_computing_structure_solution     'SHELXS-97 (Sheldrick, 1990)' 
_computing_structure_refinement   'SHELXL-97 (Sheldrick, 1997)' 
_computing_molecular_graphics     'XP in Siemens SHELXTL (Sheldrick, 1994)'
_computing_publication_material   
;
SHELX97-2 (Sheldrick, 1997) and local procedures
;
 
_refine_special_details 
; 
 Refinement of F^2^ against ALL reflections.  The weighted R-factor wR and 
 goodness of fit S are based on F^2^, conventional R-factors R are based 
 on F, with F set to zero for negative F^2^. The threshold expression of 
 F^2^ > 2sigma(F^2^) is used only for calculating R-factors(gt) etc. and is 
 not relevant to the choice of reflections for refinement.  R-factors based 
 on F^2^ are statistically about twice as large as those based on F, and R- 
 factors based on ALL data will be even larger. 
; 
 
_refine_ls_structure_factor_coef  Fsqd  
_refine_ls_matrix_type            full 
_refine_ls_weighting_scheme       calc  
_refine_ls_weighting_details 
 'calc w=1/[\s^2^(Fo^2^)+(0.0591P)^2^+0.0000P] where P=(Fo^2^+2Fc^2^)/3' 
_atom_sites_solution_primary      direct 
_atom_sites_solution_secondary    difmap 
_atom_sites_solution_hydrogens    geom 
_refine_ls_hydrogen_treatment     mixed 
_refine_ls_extinction_method      SHELXL 
_refine_ls_extinction_coef        0.011(6) 
_refine_ls_extinction_expression 
 'Fc^*^=kFc[1+0.001xFc^2^\l^3^/sin(2\q)]^-1/4^' 
_refine_ls_number_reflns          2370 
_refine_ls_number_parameters      146 
_refine_ls_number_restraints      0 
_refine_ls_R_factor_all           0.0762 
_refine_ls_R_factor_gt            0.0430 
_refine_ls_wR_factor_ref          0.1120 
_refine_ls_wR_factor_gt           0.0984 
_refine_ls_goodness_of_fit_ref    1.017 
_refine_ls_restrained_S_all       1.017 
_refine_ls_shift/su_max           0.000 
_refine_ls_shift/su_mean          0.000 
 
loop_ 
 _atom_site_label 
 _atom_site_type_symbol 
 _atom_site_fract_x 
 _atom_site_fract_y 
 _atom_site_fract_z 
 _atom_site_U_iso_or_equiv 
 _atom_site_adp_type 
 _atom_site_occupancy 
 _atom_site_symmetry_multiplicity 
 _atom_site_calc_flag 
 _atom_site_refinement_flags 
 _atom_site_disorder_assembly 
 _atom_site_disorder_group 
C1 C 0.4466(2) 0.45109(19) 0.15119(14) 0.0174(4) Uani 1 1 d . . . 
H1 H 0.5307 0.5413 0.1287 0.021 Uiso 1 1 calc R . . 
O2 O 0.59609(15) 0.60380(14) 0.38918(10) 0.0217(3) Uani 1 1 d . . . 
C2 C 0.4830(2) 0.4794(2) 0.30353(15) 0.0177(3) Uani 1 1 d . . . 
N3 N 0.37289(18) 0.35369(16) 0.33113(12) 0.0181(3) Uani 1 1 d . . . 
H3 H 0.3763 0.3524 0.4154 0.022 Uiso 1 1 calc R . . 
C4 C 0.2461(2) 0.21799(19) 0.21291(14) 0.0168(3) Uani 1 1 d . . . 
N5 N 0.37774(17) 0.14164(16) 0.12502(12) 0.0172(3) Uani 1 1 d . . . 
H5 H 0.3861 0.0248 0.0985 0.021 Uiso 1 1 calc R . . 
O6 O 0.59415(15) 0.22060(13) 0.00945(10) 0.0205(3) Uani 1 1 d . . . 
C6 C 0.4840(2) 0.26010(19) 0.08779(14) 0.0171(4) Uani 1 1 d . . . 
C7 C 0.2199(2) 0.4633(2) 0.09494(16) 0.0199(4) Uani 1 1 d . . . 
H7A H 0.1848 0.5855 0.1344 0.024 Uiso 1 1 calc R . . 
H7B H 0.1878 0.4411 -0.0055 0.024 Uiso 1 1 calc R . . 
C8 C 0.0986(2) 0.3216(2) 0.13289(15) 0.0201(4) Uani 1 1 d . . . 
H8A H 0.0111 0.3817 0.1895 0.024 Uiso 1 1 calc R . . 
H8B H 0.0135 0.2373 0.0493 0.024 Uiso 1 1 calc R . . 
C9 C 0.1547(2) 0.07159(19) 0.25994(14) 0.0173(3) Uani 1 1 d . . . 
C10 C -0.0505(2) 0.0283(2) 0.22729(15) 0.0206(4) Uani 1 1 d . . . 
H10 H -0.1373 0.0894 0.1724 0.025 Uiso 1 1 calc R . . 
C11 C -0.1292(2) -0.1045(2) 0.27489(16) 0.0237(4) Uani 1 1 d . . . 
H11 H -0.2696 -0.1341 0.2516 0.028 Uiso 1 1 calc R . . 
C12 C -0.0050(2) -0.1931(2) 0.35548(16) 0.0233(4) Uani 1 1 d . . . 
H12 H -0.0595 -0.2823 0.3886 0.028 Uiso 1 1 calc R . . 
C13 C 0.1994(2) -0.1511(2) 0.38772(15) 0.0218(4) Uani 1 1 d . . . 
H13 H 0.2856 -0.2120 0.4430 0.026 Uiso 1 1 calc R . . 
C14 C 0.2791(2) -0.0207(2) 0.33981(15) 0.0203(4) Uani 1 1 d . . . 
H14 H 0.4198 0.0062 0.3616 0.024 Uiso 1 1 calc R . . 
 
loop_ 
 _atom_site_aniso_label 
 _atom_site_aniso_U_11 
 _atom_site_aniso_U_22 
 _atom_site_aniso_U_33 
 _atom_site_aniso_U_23 
 _atom_site_aniso_U_13 
 _atom_site_aniso_U_12 
C1 0.0171(8) 0.0178(8) 0.0176(8) 0.0054(6) 0.0046(6) -0.0017(6) 
O2 0.0220(6) 0.0218(6) 0.0185(6) 0.0027(5) 0.0041(5) -0.0057(5) 
C2 0.0152(8) 0.0181(8) 0.0199(8) 0.0049(6) 0.0047(6) 0.0014(6) 
N3 0.0207(7) 0.0197(7) 0.0135(6) 0.0042(5) 0.0043(5) -0.0027(5) 
C4 0.0151(8) 0.0184(8) 0.0156(7) 0.0023(6) 0.0043(6) -0.0006(6) 
N5 0.0191(7) 0.0147(6) 0.0191(7) 0.0041(5) 0.0075(6) 0.0009(5) 
O6 0.0214(6) 0.0220(6) 0.0206(6) 0.0058(5) 0.0099(5) 0.0019(5) 
C6 0.0152(8) 0.0206(8) 0.0141(7) 0.0061(6) -0.0003(6) 0.0012(6) 
C7 0.0194(8) 0.0206(8) 0.0200(8) 0.0065(6) 0.0041(6) 0.0034(6) 
C8 0.0181(8) 0.0217(8) 0.0199(8) 0.0051(7) 0.0042(7) 0.0002(6) 
C9 0.0200(9) 0.0167(8) 0.0139(7) 0.0005(6) 0.0062(6) -0.0013(6) 
C10 0.0197(9) 0.0228(8) 0.0178(8) 0.0036(7) 0.0039(7) 0.0002(7) 
C11 0.0191(9) 0.0243(9) 0.0251(9) 0.0012(7) 0.0074(7) -0.0043(7) 
C12 0.0281(9) 0.0187(8) 0.0259(9) 0.0049(7) 0.0137(7) -0.0021(7) 
C13 0.0256(9) 0.0204(8) 0.0209(8) 0.0060(7) 0.0078(7) 0.0025(7) 
C14 0.0176(8) 0.0206(8) 0.0219(8) 0.0039(7) 0.0061(7) -0.0007(6) 
 
_geom_special_details 
; 
 All esds (except the esd in the dihedral angle between two l.s. planes) 
 are estimated using the full covariance matrix.  The cell esds are taken 
 into account individually in the estimation of esds in distances, angles 
 and torsion angles; correlations between esds in cell parameters are only 
 used when they are defined by crystal symmetry.  An approximate (isotropic) 
 treatment of cell esds is used for estimating esds involving l.s. planes. 
; 
 
loop_ 
 _geom_bond_atom_site_label_1 
 _geom_bond_atom_site_label_2 
 _geom_bond_distance 
 _geom_bond_site_symmetry_2 
 _geom_bond_publ_flag 
C1 C6 1.5104(19) . ? 
C1 C2 1.512(2) . ? 
C1 C7 1.556(2) . ? 
C1 H1 1.0000 . ? 
O2 C2 1.2336(18) . ? 
C2 N3 1.3428(19) . ? 
N3 C4 1.4731(18) . ? 
N3 H3 0.8800 . ? 
C4 N5 1.4767(18) . ? 
C4 C9 1.516(2) . ? 
C4 C8 1.538(2) . ? 
N5 C6 1.3417(18) . ? 
N5 H5 0.8800 . ? 
O6 C6 1.2378(16) . ? 
C7 C8 1.542(2) . ? 
C7 H7A 0.9900 . ? 
C7 H7B 0.9900 . ? 
C8 H8A 0.9900 . ? 
C8 H8B 0.9900 . ? 
C9 C10 1.389(2) . ? 
C9 C14 1.394(2) . ? 
C10 C11 1.394(2) . ? 
C10 H10 0.9500 . ? 
C11 C12 1.379(2) . ? 
C11 H11 0.9500 . ? 
C12 C13 1.383(2) . ? 
C12 H12 0.9500 . ? 
C13 C14 1.384(2) . ? 
C13 H13 0.9500 . ? 
C14 H14 0.9500 . ? 
 
loop_ 
 _geom_angle_atom_site_label_1 
 _geom_angle_atom_site_label_2 
 _geom_angle_atom_site_label_3 
 _geom_angle 
 _geom_angle_site_symmetry_1 
 _geom_angle_site_symmetry_3 
 _geom_angle_publ_flag 
C6 C1 C2 108.74(11) . . ? 
C6 C1 C7 105.78(12) . . ? 
C2 C1 C7 106.83(11) . . ? 
C6 C1 H1 111.7 . . ? 
C2 C1 H1 111.7 . . ? 
C7 C1 H1 111.7 . . ? 
O2 C2 N3 125.48(14) . . ? 
O2 C2 C1 123.85(13) . . ? 
N3 C2 C1 110.66(12) . . ? 
C2 N3 C4 116.49(12) . . ? 
C2 N3 H3 121.8 . . ? 
C4 N3 H3 121.8 . . ? 
N3 C4 N5 106.44(11) . . ? 
N3 C4 C9 110.09(11) . . ? 
N5 C4 C9 110.43(11) . . ? 
N3 C4 C8 106.51(12) . . ? 
N5 C4 C8 106.65(11) . . ? 
C9 C4 C8 116.20(12) . . ? 
C6 N5 C4 116.38(12) . . ? 
C6 N5 H5 121.8 . . ? 
C4 N5 H5 121.8 . . ? 
O6 C6 N5 125.41(14) . . ? 
O6 C6 C1 123.81(13) . . ? 
N5 C6 C1 110.76(12) . . ? 
C8 C7 C1 109.27(11) . . ? 
C8 C7 H7A 109.8 . . ? 
C1 C7 H7A 109.8 . . ? 
C8 C7 H7B 109.8 . . ? 
C1 C7 H7B 109.8 . . ? 
H7A C7 H7B 108.3 . . ? 
C4 C8 C7 108.20(12) . . ? 
C4 C8 H8A 110.1 . . ? 
C7 C8 H8A 110.1 . . ? 
C4 C8 H8B 110.1 . . ? 
C7 C8 H8B 110.1 . . ? 
H8A C8 H8B 108.4 . . ? 
C10 C9 C14 118.87(14) . . ? 
C10 C9 C4 121.79(13) . . ? 
C14 C9 C4 119.33(13) . . ? 
C9 C10 C11 120.14(14) . . ? 
C9 C10 H10 119.9 . . ? 
C11 C10 H10 119.9 . . ? 
C12 C11 C10 120.52(15) . . ? 
C12 C11 H11 119.7 . . ? 
C10 C11 H11 119.7 . . ? 
C11 C12 C13 119.56(15) . . ? 
C11 C12 H12 120.2 . . ? 
C13 C12 H12 120.2 . . ? 
C12 C13 C14 120.32(15) . . ? 
C12 C13 H13 119.8 . . ? 
C14 C13 H13 119.8 . . ? 
C13 C14 C9 120.58(14) . . ? 
C13 C14 H14 119.7 . . ? 
C9 C14 H14 119.7 . . ? 
 
loop_ 
 _geom_torsion_atom_site_label_1 
 _geom_torsion_atom_site_label_2 
 _geom_torsion_atom_site_label_3 
 _geom_torsion_atom_site_label_4 
 _geom_torsion 
 _geom_torsion_site_symmetry_1 
 _geom_torsion_site_symmetry_2 
 _geom_torsion_site_symmetry_3 
 _geom_torsion_site_symmetry_4 
 _geom_torsion_publ_flag 
C6 C1 C2 O2 126.78(15) . . . . ? 
C7 C1 C2 O2 -119.47(15) . . . . ? 
C6 C1 C2 N3 -54.44(16) . . . . ? 
C7 C1 C2 N3 59.31(15) . . . . ? 
O2 C2 N3 C4 179.42(13) . . . . ? 
C1 C2 N3 C4 0.66(17) . . . . ? 
C2 N3 C4 N5 52.33(16) . . . . ? 
C2 N3 C4 C9 172.03(12) . . . . ? 
C2 N3 C4 C8 -61.18(16) . . . . ? 
N3 C4 N5 C6 -53.95(15) . . . . ? 
C9 C4 N5 C6 -173.42(11) . . . . ? 
C8 C4 N5 C6 59.48(15) . . . . ? 
C4 N5 C6 O6 -176.29(13) . . . . ? 
C4 N5 C6 C1 1.91(16) . . . . ? 
C2 C1 C6 O6 -128.81(14) . . . . ? 
C7 C1 C6 O6 116.76(15) . . . . ? 
C2 C1 C6 N5 52.95(15) . . . . ? 
C7 C1 C6 N5 -61.48(14) . . . . ? 
C6 C1 C7 C8 58.31(15) . . . . ? 
C2 C1 C7 C8 -57.44(15) . . . . ? 
N3 C4 C8 C7 56.86(15) . . . . ? 
N5 C4 C8 C7 -56.52(15) . . . . ? 
C9 C4 C8 C7 179.90(12) . . . . ? 
C1 C7 C8 C4 -0.15(16) . . . . ? 
N3 C4 C9 C10 123.91(14) . . . . ? 
N5 C4 C9 C10 -118.84(14) . . . . ? 
C8 C4 C9 C10 2.8(2) . . . . ? 
N3 C4 C9 C14 -55.13(17) . . . . ? 
N5 C4 C9 C14 62.12(16) . . . . ? 
C8 C4 C9 C14 -176.28(12) . . . . ? 
C14 C9 C10 C11 0.4(2) . . . . ? 
C4 C9 C10 C11 -178.61(14) . . . . ? 
C9 C10 C11 C12 0.5(2) . . . . ? 
C10 C11 C12 C13 -0.8(2) . . . . ? 
C11 C12 C13 C14 0.2(2) . . . . ? 
C12 C13 C14 C9 0.8(2) . . . . ? 
C10 C9 C14 C13 -1.1(2) . . . . ? 
C4 C9 C14 C13 177.99(14) . . . . ? 
 
_diffrn_measured_fraction_theta_max    0.997 
_diffrn_reflns_theta_full              27.43 
_diffrn_measured_fraction_theta_full   0.997 
_refine_diff_density_max    0.286 
_refine_diff_density_min   -0.232 
_refine_diff_density_rms    0.051 


#===END

 
data_2e 
 
_audit_creation_method            SHELXL-97 
_chemical_name_systematic 
; 
 ? 
; 
_chemical_name_common             ? 
_chemical_melting_point           ? 
_chemical_formula_moiety          ? 
_chemical_formula_sum 
 'C10 H16 N2 O2' 
_chemical_formula_weight          196.25 
 
loop_ 
 _atom_type_symbol 
 _atom_type_description 
 _atom_type_scat_dispersion_real 
 _atom_type_scat_dispersion_imag 
 _atom_type_scat_source 
 'C'  'C'    .0033    .0016 
 'International Tables Vol C Tables 4.2.6.8 and 6.1.1.4' 
 'H'  'H'    .0000    .0000 
 'International Tables Vol C Tables 4.2.6.8 and 6.1.1.4' 
 'N'  'N'    .0061    .0033 
 'International Tables Vol C Tables 4.2.6.8 and 6.1.1.4' 
 'O'  'O'    .0106    .0060 
 'International Tables Vol C Tables 4.2.6.8 and 6.1.1.4' 
 
_symmetry_cell_setting            monoclinic
_symmetry_space_group_name_H-M    'P 21/m'
 
loop_ 
 _symmetry_equiv_pos_as_xyz 
 'x, y, z' 
 '-x, y+1/2, -z' 
 '-x, -y, -z' 
 'x, -y-1/2, z' 
 
_cell_length_a                    5.6414(4) 
_cell_length_b                    10.0737(7) 
_cell_length_c                    8.6069(6) 
_cell_angle_alpha                 90.00 
_cell_angle_beta                  96.624(4) 
_cell_angle_gamma                 90.00 
_cell_volume                      485.86(6) 
_cell_formula_units_Z             2 
_cell_measurement_temperature     90.0(2) 
_cell_measurement_reflns_used     4692 
_cell_measurement_theta_min       1.00 
_cell_measurement_theta_max       27.48 
 
_exptl_crystal_description        plate
_exptl_crystal_colour             colourless
_exptl_crystal_size_max           0.25 
_exptl_crystal_size_mid           0.15 
_exptl_crystal_size_min           0.07 
_exptl_crystal_density_meas       ? 
_exptl_crystal_density_diffrn     1.341 
_exptl_crystal_density_method     'not measured' 
_exptl_crystal_F_000              212 
_exptl_absorpt_coefficient_mu     0.094 
_exptl_absorpt_correction_type    none 
_exptl_absorpt_correction_T_min   ? 
_exptl_absorpt_correction_T_max   ? 
_exptl_absorpt_process_details    ? 
 
_exptl_special_details 
; 
 ? 
; 
 
_diffrn_ambient_temperature       90.0(2) 
_diffrn_radiation_wavelength      0.71073 
_diffrn_radiation_type            MoK\a 
_diffrn_radiation_source          'fine-focus sealed tube' 
_diffrn_radiation_monochromator   graphite 
_diffrn_measurement_device_type   'Nonius KappaCCD diffractometer' 
_diffrn_measurement_method        '\w scans at fixed \c = 55\%'
_diffrn_detector_area_resol_mean  18 
_diffrn_standards_number          ?
_diffrn_standards_interval_count  ? 
_diffrn_standards_interval_time   ? 
_diffrn_standards_decay_%         <1
_diffrn_reflns_number             3756 
_diffrn_reflns_av_R_equivalents   0.0532 
_diffrn_reflns_av_sigmaI/netI     0.0591 
_diffrn_reflns_limit_h_min        -7 
_diffrn_reflns_limit_h_max        7 
_diffrn_reflns_limit_k_min        -13 
_diffrn_reflns_limit_k_max        13 
_diffrn_reflns_limit_l_min        -11 
_diffrn_reflns_limit_l_max        10 
_diffrn_reflns_theta_min          2.38 
_diffrn_reflns_theta_max          27.47 
_reflns_number_total              1176 
_reflns_number_gt                 898 
_reflns_threshold_expression      >2sigma(I) 
 
_computing_data_collection        'COLLECT (Nonius, 1998)' 
_computing_cell_refinement        'SCALEPACK (Otwinowski & Minor, 1997)'
_computing_data_reduction         'DENZO-SMN (Otwinowski & Minor, 1997)'
_computing_structure_solution     'SHELXS-97 (Sheldrick, 1990)' 
_computing_structure_refinement   'SHELXL-97 (Sheldrick, 1997)' 
_computing_molecular_graphics     'XP in Siemens SHELXTL (Sheldrick, 1994)'
_computing_publication_material   
;
SHELX97-2 (Sheldrick, 1997) and local procedures
;
 
_refine_special_details 
; 
 Refinement of F^2^ against ALL reflections.  The weighted R-factor wR and 
 goodness of fit S are based on F^2^, conventional R-factors R are based 
 on F, with F set to zero for negative F^2^. The threshold expression of 
 F^2^ > 2sigma(F^2^) is used only for calculating R-factors(gt) etc. and is 
 not relevant to the choice of reflections for refinement.  R-factors based 
 on F^2^ are statistically about twice as large as those based on F, and R- 
 factors based on ALL data will be even larger. 
; 
 
_refine_ls_structure_factor_coef  Fsqd  
_refine_ls_matrix_type            full 
_refine_ls_weighting_scheme       calc  
_refine_ls_weighting_details 
 'calc w=1/[\s^2^(Fo^2^)+(0.0389P)^2^+0.2317P] where P=(Fo^2^+2Fc^2^)/3' 
_atom_sites_solution_primary      direct 
_atom_sites_solution_secondary    difmap 
_atom_sites_solution_hydrogens    geom 
_refine_ls_hydrogen_treatment     mixed 
_refine_ls_extinction_method      none 
_refine_ls_extinction_coef        ? 
_refine_ls_number_reflns          1176 
_refine_ls_number_parameters      75 
_refine_ls_number_restraints      0 
_refine_ls_R_factor_all           0.0715 
_refine_ls_R_factor_gt            0.0485 
_refine_ls_wR_factor_ref          0.1071 
_refine_ls_wR_factor_gt           0.0992 
_refine_ls_goodness_of_fit_ref    1.032 
_refine_ls_restrained_S_all       1.032 
_refine_ls_shift/su_max           2.160 
_refine_ls_shift/su_mean          0.030 
 
loop_ 
 _atom_site_label 
 _atom_site_type_symbol 
 _atom_site_fract_x 
 _atom_site_fract_y 
 _atom_site_fract_z 
 _atom_site_U_iso_or_equiv 
 _atom_site_adp_type 
 _atom_site_occupancy 
 _atom_site_symmetry_multiplicity 
 _atom_site_calc_flag 
 _atom_site_refinement_flags 
 _atom_site_disorder_assembly 
 _atom_site_disorder_group 
O1 O 0.31923(18) 0.04855(11) 0.81947(12) 0.0157(3) Uani 1 1 d . . . 
C1 C 0.0848(4) 0.2500 0.8555(3) 0.0119(5) Uani 1 2 d S . . 
C2 C 0.2472(3) 0.13123(16) 0.90894(18) 0.0123(4) Uani 1 1 d . . . 
N3 N 0.3075(2) 0.13264(13) 1.06464(14) 0.0133(3) Uani 1 1 d . . . 
H3 H 0.3858 0.0664 1.1135 0.016 Uiso 1 1 calc R . . 
C4 C 0.2366(4) 0.2500 1.1493(3) 0.0132(5) Uani 1 2 d S . . 
C5 C -0.1268(4) 0.2500 0.9581(3) 0.0144(5) Uani 1 2 d S . . 
H5A H -0.2271 0.3295 0.9330 0.017 Uiso 0.50 1 calc PR . . 
H5B H -0.2271 0.1705 0.9330 0.017 Uiso 0.50 1 calc PR . . 
C6 C -0.0366(4) 0.2500 1.1340(3) 0.0141(5) Uani 1 2 d S . . 
H6A H -0.0952 0.3298 1.1849 0.017 Uiso 0.50 1 calc PR . . 
H6B H -0.0952 0.1702 1.1849 0.017 Uiso 0.50 1 calc PR . . 
C7 C 0.3568(4) 0.2500 1.3154(2) 0.0164(5) Uani 1 2 d S . . 
H7A H 0.3048 0.3279 1.3707 0.025 Uiso 0.50 1 calc PR . . 
H7B H 0.5303 0.2530 1.3146 0.025 Uiso 1 2 calc SR . . 
H7C H 0.3132 0.1691 1.3686 0.025 Uiso 0.50 1 calc PR . . 
C8 C 0.0028(4) 0.2500 0.6789(3) 0.0147(5) Uani 1 2 d S . . 
H8 H 0.1492 0.2500 0.6236 0.018 Uiso 1 2 calc SR . . 
C9 C -0.1429(3) 0.12614(17) 0.62552(19) 0.0186(4) Uani 1 1 d . . . 
H9A H -0.2980 0.1296 0.6662 0.028 Uiso 1 1 calc R . . 
H9B H -0.0565 0.0465 0.6653 0.028 Uiso 1 1 calc R . . 
H9C H -0.1673 0.1233 0.5110 0.028 Uiso 1 1 calc R . . 
 
loop_ 
 _atom_site_aniso_label 
 _atom_site_aniso_U_11 
 _atom_site_aniso_U_22 
 _atom_site_aniso_U_33 
 _atom_site_aniso_U_23 
 _atom_site_aniso_U_13 
 _atom_site_aniso_U_12 
O1 0.0139(6) 0.0149(6) 0.0181(6) -0.0033(5) 0.0015(5) 0.0023(5) 
C1 0.0097(11) 0.0115(11) 0.0147(12) 0.000 0.0025(9) 0.000 
C2 0.0082(7) 0.0118(8) 0.0171(8) -0.0001(7) 0.0021(6) -0.0032(6) 
N3 0.0127(7) 0.0116(7) 0.0155(7) 0.0016(5) 0.0014(5) 0.0035(5) 
C4 0.0117(11) 0.0125(12) 0.0154(12) 0.000 0.0017(9) 0.000 
C5 0.0102(11) 0.0153(12) 0.0180(12) 0.000 0.0026(9) 0.000 
C6 0.0118(11) 0.0130(12) 0.0180(12) 0.000 0.0038(9) 0.000 
C7 0.0169(12) 0.0180(13) 0.0144(12) 0.000 0.0021(10) 0.000 
C8 0.0136(11) 0.0149(12) 0.0154(12) 0.000 0.0012(9) 0.000 
C9 0.0194(9) 0.0172(9) 0.0182(9) -0.0011(7) -0.0018(7) 0.0005(7) 
 
_geom_special_details 
; 
 All esds (except the esd in the dihedral angle between two l.s. planes) 
 are estimated using the full covariance matrix.  The cell esds are taken 
 into account individually in the estimation of esds in distances, angles 
 and torsion angles; correlations between esds in cell parameters are only 
 used when they are defined by crystal symmetry.  An approximate (isotropic) 
 treatment of cell esds is used for estimating esds involving l.s. planes. 
; 
 
loop_ 
 _geom_bond_atom_site_label_1 
 _geom_bond_atom_site_label_2 
 _geom_bond_distance 
 _geom_bond_site_symmetry_2 
 _geom_bond_publ_flag 
O1 C2 1.2346(18) . ? 
C1 C8 1.537(3) . ? 
C1 C2 1.544(2) . ? 
C1 C2 1.544(2) 4_565 ? 
C1 C5 1.565(3) . ? 
C2 N3 1.3442(19) . ? 
N3 C4 1.4681(18) . ? 
N3 H3 0.8800 . ? 
C4 N3 1.4681(18) 4_565 ? 
C4 C7 1.510(3) . ? 
C4 C6 1.532(3) . ? 
C5 C6 1.540(3) . ? 
C5 H5A 0.9900 . ? 
C5 H5B 0.9900 . ? 
C6 H6A 0.9900 . ? 
C6 H6B 0.9900 . ? 
C7 H7A 0.9803 . ? 
C7 H7B 0.9803 . ? 
C7 H7C 0.9803 . ? 
C8 C9 1.535(2) 4_565 ? 
C8 C9 1.535(2) . ? 
C8 H8 1.0000 . ? 
C9 H9A 0.9800 . ? 
C9 H9B 0.9800 . ? 
C9 H9C 0.9800 . ? 
 
loop_ 
 _geom_angle_atom_site_label_1 
 _geom_angle_atom_site_label_2 
 _geom_angle_atom_site_label_3 
 _geom_angle 
 _geom_angle_site_symmetry_1 
 _geom_angle_site_symmetry_3 
 _geom_angle_publ_flag 
C8 C1 C2 113.27(12) . . ? 
C8 C1 C2 113.27(12) . 4_565 ? 
C2 C1 C2 101.58(16) . 4_565 ? 
C8 C1 C5 113.31(17) . . ? 
C2 C1 C5 107.27(12) . . ? 
C2 C1 C5 107.27(12) 4_565 . ? 
O1 C2 N3 124.42(14) . . ? 
O1 C2 C1 124.31(15) . . ? 
N3 C2 C1 111.22(14) . . ? 
C2 N3 C4 116.81(14) . . ? 
C2 N3 H3 121.6 . . ? 
C4 N3 H3 121.6 . . ? 
N3 C4 N3 107.27(17) 4_565 . ? 
N3 C4 C7 110.58(12) 4_565 . ? 
N3 C4 C7 110.58(12) . . ? 
N3 C4 C6 106.64(12) 4_565 . ? 
N3 C4 C6 106.64(12) . . ? 
C7 C4 C6 114.76(19) . . ? 
C6 C5 C1 111.56(17) . . ? 
C6 C5 H5A 109.3 . . ? 
C1 C5 H5A 109.3 . . ? 
C6 C5 H5B 109.3 . . ? 
C1 C5 H5B 109.3 . . ? 
H5A C5 H5B 108.0 . . ? 
C4 C6 C5 107.44(18) . . ? 
C4 C6 H6A 110.2 . . ? 
C5 C6 H6A 110.2 . . ? 
C4 C6 H6B 110.2 . . ? 
C5 C6 H6B 110.2 . . ? 
H6A C6 H6B 108.5 . . ? 
C4 C7 H7A 109.5 . . ? 
C4 C7 H7B 109.5 . . ? 
H7A C7 H7B 109.4 . . ? 
C4 C7 H7C 109.5 . . ? 
H7A C7 H7C 109.4 . . ? 
H7B C7 H7C 109.4 . . ? 
C9 C8 C9 108.74(18) 4_565 . ? 
C9 C8 C1 112.71(12) 4_565 . ? 
C9 C8 C1 112.70(12) . . ? 
C9 C8 H8 107.5 4_565 . ? 
C9 C8 H8 107.5 . . ? 
C1 C8 H8 107.5 . . ? 
C8 C9 H9A 109.5 . . ? 
C8 C9 H9B 109.5 . . ? 
H9A C9 H9B 109.5 . . ? 
C8 C9 H9C 109.5 . . ? 
H9A C9 H9C 109.5 . . ? 
H9B C9 H9C 109.5 . . ? 
 
loop_ 
 _geom_torsion_atom_site_label_1 
 _geom_torsion_atom_site_label_2 
 _geom_torsion_atom_site_label_3 
 _geom_torsion_atom_site_label_4 
 _geom_torsion 
 _geom_torsion_site_symmetry_1 
 _geom_torsion_site_symmetry_2 
 _geom_torsion_site_symmetry_3 
 _geom_torsion_site_symmetry_4 
 _geom_torsion_publ_flag 
C8 C1 C2 O1 4.7(2) . . . . ? 
C2 C1 C2 O1 -117.10(15) 4_565 . . . ? 
C5 C1 C2 O1 130.50(16) . . . . ? 
C8 C1 C2 N3 -177.79(13) . . . . ? 
C2 C1 C2 N3 60.40(19) 4_565 . . . ? 
C5 C1 C2 N3 -51.99(16) . . . . ? 
O1 C2 N3 C4 170.40(15) . . . . ? 
C1 C2 N3 C4 -7.11(19) . . . . ? 
C2 N3 C4 N3 -48.2(2) . . . 4_565 ? 
C2 N3 C4 C7 -168.88(14) . . . . ? 
C2 N3 C4 C6 65.73(18) . . . . ? 
C8 C1 C5 C6 180.0 . . . . ? 
C2 C1 C5 C6 54.23(11) . . . . ? 
C2 C1 C5 C6 -54.23(10) 4_565 . . . ? 
N3 C4 C6 C5 57.19(11) 4_565 . . . ? 
N3 C4 C6 C5 -57.19(11) . . . . ? 
C7 C4 C6 C5 180.000(1) . . . . ? 
C1 C5 C6 C4 0.000(1) . . . . ? 
C2 C1 C8 C9 -175.74(14) . . . 4_565 ? 
C2 C1 C8 C9 -60.7(2) 4_565 . . 4_565 ? 
C5 C1 C8 C9 61.77(14) . . . 4_565 ? 
C2 C1 C8 C9 60.7(2) . . . . ? 
C2 C1 C8 C9 175.73(14) 4_565 . . . ? 
C5 C1 C8 C9 -61.77(14) . . . . ? 
 
_diffrn_measured_fraction_theta_max    1.000 
_diffrn_reflns_theta_full              27.47 
_diffrn_measured_fraction_theta_full   1.000 
_refine_diff_density_max     .288 
_refine_diff_density_min    -.306 
_refine_diff_density_rms     .053 

#===END

 
data_2f 
 
_audit_creation_method            SHELXL-97 
_chemical_name_systematic 
; 
 ? 
; 
_chemical_name_common             ? 
_chemical_melting_point           ? 
_chemical_formula_moiety          ? 
_chemical_formula_sum 
 'C19 H18 N2 O2' 
_chemical_formula_weight          306.35 
 
loop_ 
 _atom_type_symbol 
 _atom_type_description 
 _atom_type_scat_dispersion_real 
 _atom_type_scat_dispersion_imag 
 _atom_type_scat_source 
 'C'  'C'   0.0033   0.0016 
 'International Tables Vol C Tables 4.2.6.8 and 6.1.1.4' 
 'H'  'H'   0.0000   0.0000 
 'International Tables Vol C Tables 4.2.6.8 and 6.1.1.4' 
 'N'  'N'   0.0061   0.0033 
 'International Tables Vol C Tables 4.2.6.8 and 6.1.1.4' 
 'O'  'O'   0.0106   0.0060 
 'International Tables Vol C Tables 4.2.6.8 and 6.1.1.4' 
 
_symmetry_cell_setting            monoclinic
_symmetry_space_group_name_H-M    'P 21'
 
loop_ 
 _symmetry_equiv_pos_as_xyz 
 'x, y, z' 
 '-x, y+1/2, -z' 
 
_cell_length_a                    5.62800(10) 
_cell_length_b                    10.2360(2) 
_cell_length_c                    13.2680(3) 
_cell_angle_alpha                 90.00 
_cell_angle_beta                  91.1120(9) 
_cell_angle_gamma                 90.00 
_cell_volume                      764.20(3) 
_cell_formula_units_Z             2 
_cell_measurement_temperature     90.0(2) 
_cell_measurement_reflns_used     ? 
_cell_measurement_theta_min       ? 
_cell_measurement_theta_max       ? 
 
_exptl_crystal_description        ? 
_exptl_crystal_colour             ? 
_exptl_crystal_size_max           0.40 
_exptl_crystal_size_mid           0.15 
_exptl_crystal_size_min           0.08 
_exptl_crystal_density_meas       ? 
_exptl_crystal_density_diffrn     1.331 
_exptl_crystal_density_method     'not measured' 
_exptl_crystal_F_000              324 
_exptl_absorpt_coefficient_mu     0.087 
_exptl_absorpt_correction_type    multi-scan 
_exptl_absorpt_correction_T_min   0.9659 
_exptl_absorpt_correction_T_max   0.9930 
_exptl_absorpt_process_details    'Scalepack (Otwinowski & Minor, 1997)'
 
_exptl_special_details 
; 
 ? 
; 
 
_diffrn_ambient_temperature       90.0(2) 
_diffrn_radiation_wavelength      0.71073 
_diffrn_radiation_type            MoK\a 
_diffrn_radiation_source          'fine-focus sealed tube' 
_diffrn_radiation_monochromator   graphite 
_diffrn_measurement_device_type   'Nonius KappaCCD diffractometer' 
_diffrn_measurement_method        '\w scans at fixed \c = 55\%'
_diffrn_detector_area_resol_mean  18 
_diffrn_standards_number          ?
_diffrn_standards_interval_count  ? 
_diffrn_standards_interval_time   ? 
_diffrn_standards_decay_%         <1
_diffrn_reflns_number             3422 
_diffrn_reflns_av_R_equivalents   0.0000 
_diffrn_reflns_av_sigmaI/netI     0.0356 
_diffrn_reflns_limit_h_min        -7 
_diffrn_reflns_limit_h_max        7 
_diffrn_reflns_limit_k_min        -13 
_diffrn_reflns_limit_k_max        13 
_diffrn_reflns_limit_l_min        -17 
_diffrn_reflns_limit_l_max        17 
_diffrn_reflns_theta_min          1.54 
_diffrn_reflns_theta_max          27.49 
_reflns_number_total              3422 
_reflns_number_gt                 3079 
_reflns_threshold_expression      >2\s(I) 
 
_computing_data_collection        'COLLECT (Nonius, 1998)' 
_computing_cell_refinement        'SCALEPACK (Otwinowski & Minor, 1997)'
_computing_data_reduction         'DENZO-SMN (Otwinowski & Minor, 1997)'
_computing_structure_solution     'SHELXS-97 (Sheldrick, 1990)' 
_computing_structure_refinement   'SHELXL-97 (Sheldrick, 1997)' 
_computing_molecular_graphics     'XP in Siemens SHELXTL (Sheldrick, 1994)'
_computing_publication_material   
;
SHELX97-2 (Sheldrick, 1997) and local procedures
;
 
_refine_special_details 
; 
 Refinement of F^2^ against ALL reflections.  The weighted R-factor wR and 
 goodness of fit S are based on F^2^, conventional R-factors R are based 
 on F, with F set to zero for negative F^2^. The threshold expression of 
 F^2^ > 2sigma(F^2^) is used only for calculating R-factors(gt) etc. and is 
 not relevant to the choice of reflections for refinement.  R-factors based 
 on F^2^ are statistically about twice as large as those based on F, and R- 
 factors based on ALL data will be even larger. 
; 
 
_refine_ls_structure_factor_coef  Fsqd  
_refine_ls_matrix_type            full 
_refine_ls_weighting_scheme       calc  
_refine_ls_weighting_details 
 'calc w=1/[\s^2^(Fo^2^)+(0.0571P)^2^+0.2003P] where P=(Fo^2^+2Fc^2^)/3' 
_atom_sites_solution_primary      direct 
_atom_sites_solution_secondary    difmap 
_atom_sites_solution_hydrogens    geom 
_refine_ls_hydrogen_treatment     mixed 
_refine_ls_extinction_method      SHELXL 
_refine_ls_extinction_coef        0.026(5) 
_refine_ls_extinction_expression 
 'Fc^*^=kFc[1+0.001xFc^2^\l^3^/sin(2\q)]^-1/4^' 
_refine_ls_abs_structure_details 
 'Flack H D (1983), Acta Cryst. A39, 876-881' 
_refine_ls_abs_structure_Flack    -0.1(12) 
_refine_ls_number_reflns          3422 
_refine_ls_number_parameters      209 
_refine_ls_number_restraints      1 
_refine_ls_R_factor_all           0.0468 
_refine_ls_R_factor_gt            0.0395 
_refine_ls_wR_factor_ref          0.1035 
_refine_ls_wR_factor_gt           0.0982 
_refine_ls_goodness_of_fit_ref    1.022 
_refine_ls_restrained_S_all       1.022 
_refine_ls_shift/su_max           0.002 
_refine_ls_shift/su_mean          0.000 
 
loop_ 
 _atom_site_label 
 _atom_site_type_symbol 
 _atom_site_fract_x 
 _atom_site_fract_y 
 _atom_site_fract_z 
 _atom_site_U_iso_or_equiv 
 _atom_site_adp_type 
 _atom_site_occupancy 
 _atom_site_symmetry_multiplicity 
 _atom_site_calc_flag 
 _atom_site_refinement_flags 
 _atom_site_disorder_assembly 
 _atom_site_disorder_group 
C1 C 0.2910(3) -0.16101(19) 0.13755(11) 0.0163(3) Uani 1 1 d . . . 
O2 O 0.0686(2) 0.04256(12) 0.11973(9) 0.0207(3) Uani 1 1 d . . . 
C2 C 0.1747(3) -0.04785(17) 0.07868(13) 0.0174(3) Uani 1 1 d . . . 
N3 N 0.2054(3) -0.05915(14) -0.02100(11) 0.0180(3) Uani 1 1 d . . . 
H3 H 0.1501 -0.0005 -0.0639 0.022 Uiso 1 1 calc R . . 
C4 C 0.3369(3) -0.17514(17) -0.05445(12) 0.0165(3) Uani 1 1 d . . . 
N5 N 0.2263(3) -0.29011(15) -0.00904(11) 0.0184(3) Uani 1 1 d . . . 
H5 H 0.1901 -0.3598 -0.0450 0.022 Uiso 1 1 calc R . . 
O6 O 0.0638(2) -0.36530(12) 0.13589(9) 0.0222(3) Uani 1 1 d . . . 
C6 C 0.1827(3) -0.28407(17) 0.08991(13) 0.0165(3) Uani 1 1 d . . . 
C7 C 0.5596(3) -0.1573(2) 0.10902(12) 0.0197(3) Uani 1 1 d . . . 
H7A H 0.6328 -0.0759 0.1352 0.024 Uiso 1 1 calc R . . 
H7B H 0.6435 -0.2321 0.1409 0.024 Uiso 1 1 calc R . . 
C8 C 0.5878(3) -0.1637(2) -0.00644(12) 0.0203(3) Uani 1 1 d . . . 
H8A H 0.6676 -0.0838 -0.0308 0.024 Uiso 1 1 calc R . . 
H8B H 0.6852 -0.2403 -0.0248 0.024 Uiso 1 1 calc R . . 
C9 C 0.3223(3) -0.19253(16) -0.16825(12) 0.0176(4) Uani 1 1 d . . . 
C10 C 0.1184(3) -0.15402(19) -0.22243(12) 0.0213(4) Uani 1 1 d . . . 
H10 H -0.0042 -0.1077 -0.1896 0.026 Uiso 1 1 calc R . . 
C11 C 0.0954(3) -0.18367(19) -0.32449(13) 0.0233(4) Uani 1 1 d . . . 
H11 H -0.0421 -0.1560 -0.3612 0.028 Uiso 1 1 calc R . . 
C12 C 0.2702(3) -0.25297(18) -0.37305(14) 0.0233(4) Uani 1 1 d . . . 
H12 H 0.2516 -0.2748 -0.4423 0.028 Uiso 1 1 calc R . . 
C13 C 0.4727(3) -0.29019(19) -0.31955(14) 0.0236(4) Uani 1 1 d . . . 
H13 H 0.5953 -0.3359 -0.3529 0.028 Uiso 1 1 calc R . . 
C14 C 0.4984(3) -0.26132(18) -0.21755(14) 0.0222(4) Uani 1 1 d . . . 
H14 H 0.6370 -0.2887 -0.1814 0.027 Uiso 1 1 calc R . . 
C15 C 0.2441(3) -0.14770(18) 0.25063(12) 0.0187(3) Uani 1 1 d . . . 
H15A H 0.2605 -0.0546 0.2696 0.022 Uiso 1 1 calc R . . 
H15B H 0.0777 -0.1737 0.2628 0.022 Uiso 1 1 calc R . . 
C16 C 0.4062(3) -0.22783(18) 0.31885(13) 0.0202(4) Uani 1 1 d . . . 
C17 C 0.3570(3) -0.35824(19) 0.34096(13) 0.0240(4) Uani 1 1 d . . . 
H17 H 0.2175 -0.3980 0.3136 0.029 Uiso 1 1 calc R . . 
C18 C 0.5105(4) -0.4308(2) 0.40277(15) 0.0303(5) Uani 1 1 d . . . 
H18 H 0.4747 -0.5193 0.4178 0.036 Uiso 1 1 calc R . . 
C19 C 0.7149(4) -0.3739(2) 0.44232(15) 0.0315(5) Uani 1 1 d . . . 
H19 H 0.8210 -0.4239 0.4833 0.038 Uiso 1 1 calc R . . 
C20 C 0.7649(3) -0.2442(2) 0.42220(14) 0.0289(4) Uani 1 1 d . . . 
H20 H 0.9042 -0.2049 0.4501 0.035 Uiso 1 1 calc R . . 
C21 C 0.6111(3) -0.1715(2) 0.36120(13) 0.0249(4) Uani 1 1 d . . . 
H21 H 0.6458 -0.0823 0.3481 0.030 Uiso 1 1 calc R . . 
 
loop_ 
 _atom_site_aniso_label 
 _atom_site_aniso_U_11 
 _atom_site_aniso_U_22 
 _atom_site_aniso_U_33 
 _atom_site_aniso_U_23 
 _atom_site_aniso_U_13 
 _atom_site_aniso_U_12 
C1 0.0165(7) 0.0178(8) 0.0146(7) -0.0005(7) -0.0023(5) 0.0002(7) 
O2 0.0241(6) 0.0189(6) 0.0190(6) -0.0022(5) -0.0016(5) 0.0035(5) 
C2 0.0150(8) 0.0174(8) 0.0196(8) -0.0002(7) -0.0018(6) -0.0026(6) 
N3 0.0208(7) 0.0171(7) 0.0162(7) 0.0020(6) -0.0007(5) 0.0019(6) 
C4 0.0154(7) 0.0173(8) 0.0167(8) -0.0007(7) 0.0003(6) -0.0001(7) 
N5 0.0206(7) 0.0154(7) 0.0192(7) -0.0033(6) -0.0002(5) -0.0018(6) 
O6 0.0253(7) 0.0215(7) 0.0198(6) 0.0009(5) -0.0002(5) -0.0042(5) 
C6 0.0158(8) 0.0164(8) 0.0173(8) 0.0015(7) -0.0013(6) 0.0013(6) 
C7 0.0150(7) 0.0251(9) 0.0190(8) 0.0004(8) -0.0026(6) -0.0002(7) 
C8 0.0157(7) 0.0257(9) 0.0193(8) -0.0018(8) -0.0009(6) 0.0003(8) 
C9 0.0188(7) 0.0182(9) 0.0159(8) 0.0015(6) 0.0014(6) -0.0016(6) 
C10 0.0191(7) 0.0242(9) 0.0206(8) -0.0013(8) -0.0006(6) 0.0014(8) 
C11 0.0217(8) 0.0281(10) 0.0201(8) 0.0013(8) -0.0036(6) 0.0011(7) 
C12 0.0288(9) 0.0255(9) 0.0156(8) -0.0014(7) 0.0004(7) -0.0016(7) 
C13 0.0272(9) 0.0222(9) 0.0216(9) -0.0003(7) 0.0045(7) 0.0035(7) 
C14 0.0223(8) 0.0230(9) 0.0211(9) 0.0008(7) -0.0013(7) 0.0021(7) 
C15 0.0194(7) 0.0202(8) 0.0164(8) -0.0013(7) -0.0022(6) 0.0016(7) 
C16 0.0213(8) 0.0254(9) 0.0140(8) -0.0028(7) 0.0015(6) 0.0045(7) 
C17 0.0289(9) 0.0249(9) 0.0183(9) -0.0022(8) 0.0012(7) 0.0026(8) 
C18 0.0408(11) 0.0279(11) 0.0224(10) 0.0020(8) 0.0036(8) 0.0106(9) 
C19 0.0324(10) 0.0422(12) 0.0199(9) 0.0027(9) -0.0009(8) 0.0183(9) 
C20 0.0228(9) 0.0466(12) 0.0174(8) -0.0017(9) 0.0003(7) 0.0050(8) 
C21 0.0236(8) 0.0323(10) 0.0188(8) 0.0007(9) 0.0000(6) -0.0009(8) 
 
_geom_special_details 
; 
 All esds (except the esd in the dihedral angle between two l.s. planes) 
 are estimated using the full covariance matrix.  The cell esds are taken 
 into account individually in the estimation of esds in distances, angles 
 and torsion angles; correlations between esds in cell parameters are only 
 used when they are defined by crystal symmetry.  An approximate (isotropic) 
 treatment of cell esds is used for estimating esds involving l.s. planes. 
; 
 
loop_ 
 _geom_bond_atom_site_label_1 
 _geom_bond_atom_site_label_2 
 _geom_bond_distance 
 _geom_bond_site_symmetry_2 
 _geom_bond_publ_flag 
C1 C6 1.530(2) . ? 
C1 C15 1.534(2) . ? 
C1 C2 1.536(2) . ? 
C1 C7 1.566(2) . ? 
O2 C2 1.234(2) . ? 
C2 N3 1.342(2) . ? 
N3 C4 1.472(2) . ? 
N3 H3 0.8800 . ? 
C4 N5 1.466(2) . ? 
C4 C9 1.521(2) . ? 
C4 C8 1.542(2) . ? 
N5 C6 1.342(2) . ? 
N5 H5 0.8800 . ? 
O6 C6 1.236(2) . ? 
C7 C8 1.545(2) . ? 
C7 H7A 0.9900 . ? 
C7 H7B 0.9900 . ? 
C8 H8A 0.9900 . ? 
C8 H8B 0.9900 . ? 
C9 C14 1.390(2) . ? 
C9 C10 1.399(2) . ? 
C10 C11 1.391(2) . ? 
C10 H10 0.9500 . ? 
C11 C12 1.383(3) . ? 
C11 H11 0.9500 . ? 
C12 C13 1.384(3) . ? 
C12 H12 0.9500 . ? 
C13 C14 1.390(3) . ? 
C13 H13 0.9500 . ? 
C14 H14 0.9500 . ? 
C15 C16 1.514(2) . ? 
C15 H15A 0.9900 . ? 
C15 H15B 0.9900 . ? 
C16 C17 1.396(3) . ? 
C16 C21 1.398(2) . ? 
C17 C18 1.394(3) . ? 
C17 H17 0.9500 . ? 
C18 C19 1.383(3) . ? 
C18 H18 0.9500 . ? 
C19 C20 1.384(3) . ? 
C19 H19 0.9500 . ? 
C20 C21 1.389(3) . ? 
C20 H20 0.9500 . ? 
C21 H21 0.9500 . ? 
 
loop_ 
 _geom_angle_atom_site_label_1 
 _geom_angle_atom_site_label_2 
 _geom_angle_atom_site_label_3 
 _geom_angle 
 _geom_angle_site_symmetry_1 
 _geom_angle_site_symmetry_3 
 _geom_angle_publ_flag 
C6 C1 C15 113.71(14) . . ? 
C6 C1 C2 104.37(12) . . ? 
C15 C1 C2 110.51(14) . . ? 
C6 C1 C7 107.37(14) . . ? 
C15 C1 C7 114.79(12) . . ? 
C2 C1 C7 105.24(14) . . ? 
O2 C2 N3 124.92(16) . . ? 
O2 C2 C1 123.11(15) . . ? 
N3 C2 C1 111.97(14) . . ? 
C2 N3 C4 116.22(14) . . ? 
C2 N3 H3 121.9 . . ? 
C4 N3 H3 121.9 . . ? 
N5 C4 N3 107.66(12) . . ? 
N5 C4 C9 107.38(13) . . ? 
N3 C4 C9 112.08(13) . . ? 
N5 C4 C8 106.50(13) . . ? 
N3 C4 C8 106.01(13) . . ? 
C9 C4 C8 116.77(13) . . ? 
C6 N5 C4 116.88(14) . . ? 
C6 N5 H5 121.6 . . ? 
C4 N5 H5 121.6 . . ? 
O6 C6 N5 124.27(16) . . ? 
O6 C6 C1 124.40(15) . . ? 
N5 C6 C1 111.30(14) . . ? 
C8 C7 C1 110.91(12) . . ? 
C8 C7 H7A 109.5 . . ? 
C1 C7 H7A 109.5 . . ? 
C8 C7 H7B 109.5 . . ? 
C1 C7 H7B 109.5 . . ? 
H7A C7 H7B 108.0 . . ? 
C4 C8 C7 107.59(12) . . ? 
C4 C8 H8A 110.2 . . ? 
C7 C8 H8A 110.2 . . ? 
C4 C8 H8B 110.2 . . ? 
C7 C8 H8B 110.2 . . ? 
H8A C8 H8B 108.5 . . ? 
C14 C9 C10 119.11(16) . . ? 
C14 C9 C4 120.08(15) . . ? 
C10 C9 C4 120.33(14) . . ? 
C11 C10 C9 119.90(16) . . ? 
C11 C10 H10 120.1 . . ? 
C9 C10 H10 120.1 . . ? 
C12 C11 C10 120.79(16) . . ? 
C12 C11 H11 119.6 . . ? 
C10 C11 H11 119.6 . . ? 
C11 C12 C13 119.25(17) . . ? 
C11 C12 H12 120.4 . . ? 
C13 C12 H12 120.4 . . ? 
C12 C13 C14 120.65(17) . . ? 
C12 C13 H13 119.7 . . ? 
C14 C13 H13 119.7 . . ? 
C9 C14 C13 120.29(17) . . ? 
C9 C14 H14 119.9 . . ? 
C13 C14 H14 119.9 . . ? 
C16 C15 C1 115.05(14) . . ? 
C16 C15 H15A 108.5 . . ? 
C1 C15 H15A 108.5 . . ? 
C16 C15 H15B 108.5 . . ? 
C1 C15 H15B 108.5 . . ? 
H15A C15 H15B 107.5 . . ? 
C17 C16 C21 118.39(17) . . ? 
C17 C16 C15 121.62(16) . . ? 
C21 C16 C15 119.99(16) . . ? 
C18 C17 C16 120.67(18) . . ? 
C18 C17 H17 119.7 . . ? 
C16 C17 H17 119.7 . . ? 
C19 C18 C17 120.0(2) . . ? 
C19 C18 H18 120.0 . . ? 
C17 C18 H18 120.0 . . ? 
C18 C19 C20 120.07(18) . . ? 
C18 C19 H19 120.0 . . ? 
C20 C19 H19 120.0 . . ? 
C19 C20 C21 119.96(19) . . ? 
C19 C20 H20 120.0 . . ? 
C21 C20 H20 120.0 . . ? 
C20 C21 C16 120.86(19) . . ? 
C20 C21 H21 119.6 . . ? 
C16 C21 H21 119.6 . . ? 
 
loop_ 
 _geom_torsion_atom_site_label_1 
 _geom_torsion_atom_site_label_2 
 _geom_torsion_atom_site_label_3 
 _geom_torsion_atom_site_label_4 
 _geom_torsion 
 _geom_torsion_site_symmetry_1 
 _geom_torsion_site_symmetry_2 
 _geom_torsion_site_symmetry_3 
 _geom_torsion_site_symmetry_4 
 _geom_torsion_publ_flag 
C6 C1 C2 O2 125.55(17) . . . . ? 
C15 C1 C2 O2 2.9(2) . . . . ? 
C7 C1 C2 O2 -121.54(17) . . . . ? 
C6 C1 C2 N3 -55.20(16) . . . . ? 
C15 C1 C2 N3 -177.82(13) . . . . ? 
C7 C1 C2 N3 57.71(17) . . . . ? 
O2 C2 N3 C4 -179.79(15) . . . . ? 
C1 C2 N3 C4 1.0(2) . . . . ? 
C2 N3 C4 N5 51.37(17) . . . . ? 
C2 N3 C4 C9 169.24(14) . . . . ? 
C2 N3 C4 C8 -62.29(18) . . . . ? 
N3 C4 N5 C6 -47.71(17) . . . . ? 
C9 C4 N5 C6 -168.57(13) . . . . ? 
C8 C4 N5 C6 65.63(17) . . . . ? 
C4 N5 C6 O6 170.29(15) . . . . ? 
C4 N5 C6 C1 -7.51(19) . . . . ? 
C15 C1 C6 O6 1.4(2) . . . . ? 
C2 C1 C6 O6 -119.08(17) . . . . ? 
C7 C1 C6 O6 129.55(17) . . . . ? 
C15 C1 C6 N5 179.22(13) . . . . ? 
C2 C1 C6 N5 58.72(16) . . . . ? 
C7 C1 C6 N5 -52.65(17) . . . . ? 
C6 C1 C7 C8 55.64(19) . . . . ? 
C15 C1 C7 C8 -176.87(16) . . . . ? 
C2 C1 C7 C8 -55.14(19) . . . . ? 
N5 C4 C8 C7 -55.94(18) . . . . ? 
N3 C4 C8 C7 58.53(18) . . . . ? 
C9 C4 C8 C7 -175.83(15) . . . . ? 
C1 C7 C8 C4 -1.4(2) . . . . ? 
N5 C4 C9 C14 -86.50(18) . . . . ? 
N3 C4 C9 C14 155.47(15) . . . . ? 
C8 C4 C9 C14 32.9(2) . . . . ? 
N5 C4 C9 C10 85.52(18) . . . . ? 
N3 C4 C9 C10 -32.5(2) . . . . ? 
C8 C4 C9 C10 -155.07(16) . . . . ? 
C14 C9 C10 C11 -0.6(3) . . . . ? 
C4 C9 C10 C11 -172.71(16) . . . . ? 
C9 C10 C11 C12 1.1(3) . . . . ? 
C10 C11 C12 C13 -1.6(3) . . . . ? 
C11 C12 C13 C14 1.6(3) . . . . ? 
C10 C9 C14 C13 0.6(3) . . . . ? 
C4 C9 C14 C13 172.73(16) . . . . ? 
C12 C13 C14 C9 -1.1(3) . . . . ? 
C6 C1 C15 C16 80.37(18) . . . . ? 
C2 C1 C15 C16 -162.64(14) . . . . ? 
C7 C1 C15 C16 -43.8(2) . . . . ? 
C1 C15 C16 C17 -85.3(2) . . . . ? 
C1 C15 C16 C21 94.51(19) . . . . ? 
C21 C16 C17 C18 -0.8(2) . . . . ? 
C15 C16 C17 C18 179.05(16) . . . . ? 
C16 C17 C18 C19 -0.5(3) . . . . ? 
C17 C18 C19 C20 1.3(3) . . . . ? 
C18 C19 C20 C21 -0.8(3) . . . . ? 
C19 C20 C21 C16 -0.5(3) . . . . ? 
C17 C16 C21 C20 1.3(2) . . . . ? 
C15 C16 C21 C20 -178.57(16) . . . . ? 
 
_diffrn_measured_fraction_theta_max    1.000 
_diffrn_reflns_theta_full              27.49 
_diffrn_measured_fraction_theta_full   1.000 
_refine_diff_density_max    0.237 
_refine_diff_density_min   -0.317 
_refine_diff_density_rms    0.046 

#===END

 
data_2g 
 
_audit_creation_method            SHELXL-97 
_chemical_name_systematic 
; 
 ? 
; 
_chemical_name_common             ? 
_chemical_melting_point           ? 
_chemical_formula_moiety          ? 
_chemical_formula_sum 
 'C7 H10 N2 O2' 
_chemical_formula_weight          154.17 
 
loop_ 
 _atom_type_symbol 
 _atom_type_description 
 _atom_type_scat_dispersion_real 
 _atom_type_scat_dispersion_imag 
 _atom_type_scat_source 
 'C'  'C'   0.0033   0.0016 
 'International Tables Vol C Tables 4.2.6.8 and 6.1.1.4' 
 'H'  'H'   0.0000   0.0000 
 'International Tables Vol C Tables 4.2.6.8 and 6.1.1.4' 
 'N'  'N'   0.0061   0.0033 
 'International Tables Vol C Tables 4.2.6.8 and 6.1.1.4' 
 'O'  'O'   0.0106   0.0060 
 'International Tables Vol C Tables 4.2.6.8 and 6.1.1.4' 
 
_symmetry_cell_setting            monoclinic
_symmetry_space_group_name_H-M    'P 21/c'
 
loop_ 
 _symmetry_equiv_pos_as_xyz 
 'x, y, z' 
 '-x, y+1/2, -z+1/2' 
 '-x, -y, -z' 
 'x, -y-1/2, z-1/2' 
 
_cell_length_a                    9.7000(3) 
_cell_length_b                    7.4300(2) 
_cell_length_c                    9.9090(4) 
_cell_angle_alpha                 90.00 
_cell_angle_beta                  94.5650(13) 
_cell_angle_gamma                 90.00 
_cell_volume                      711.89(4) 
_cell_formula_units_Z             4 
_cell_measurement_temperature     90.0(2) 
_cell_measurement_reflns_used     1714
_cell_measurement_theta_min       1.00
_cell_measurement_theta_max       27.48
 
_exptl_crystal_description        plate
_exptl_crystal_colour             colourless
_exptl_crystal_size_max           0.35 
_exptl_crystal_size_mid           0.30 
_exptl_crystal_size_min           0.08 
_exptl_crystal_density_meas       ? 
_exptl_crystal_density_diffrn     1.438 
_exptl_crystal_density_method     'not measured' 
_exptl_crystal_F_000              328 
_exptl_absorpt_coefficient_mu     0.107 
_exptl_absorpt_correction_type    multi-scan
_exptl_absorpt_correction_T_min   0.9634 
_exptl_absorpt_correction_T_max   0.9915 
_exptl_absorpt_process_details    'Scalepack (Otwinowski & Minor, 1997)'
 
_exptl_special_details 
; 
 ? 
; 
 
_diffrn_ambient_temperature       90.0(2) 
_diffrn_radiation_wavelength      0.71073 
_diffrn_radiation_type            MoK\a 
_diffrn_radiation_source          'fine-focus sealed tube' 
_diffrn_radiation_monochromator   graphite 
_diffrn_measurement_device_type   'Nonius KappaCCD diffractometer' 
_diffrn_measurement_method        '\w scans at fixed \c = 55\%'
_diffrn_detector_area_resol_mean  18 
_diffrn_standards_number          ?
_diffrn_standards_interval_count  ? 
_diffrn_standards_interval_time   ? 
_diffrn_standards_decay_%         <1
_diffrn_reflns_number             3100 
_diffrn_reflns_av_R_equivalents   0.0199 
_diffrn_reflns_av_sigmaI/netI     0.0318 
_diffrn_reflns_limit_h_min        -12 
_diffrn_reflns_limit_h_max        12 
_diffrn_reflns_limit_k_min        -9 
_diffrn_reflns_limit_k_max        9 
_diffrn_reflns_limit_l_min        -12 
_diffrn_reflns_limit_l_max        12 
_diffrn_reflns_theta_min          2.11 
_diffrn_reflns_theta_max          27.49 
_reflns_number_total              1631 
_reflns_number_gt                 1343 
_reflns_threshold_expression      >2sigma(I) 
 
_computing_data_collection        'COLLECT (Nonius, 1998)' 
_computing_cell_refinement        'SCALEPACK (Otwinowski & Minor, 1997)'
_computing_data_reduction         'DENZO-SMN (Otwinowski & Minor, 1997)'
_computing_structure_solution     'SHELXS-97 (Sheldrick, 1990)' 
_computing_structure_refinement   'SHELXL-97 (Sheldrick, 1997)' 
_computing_molecular_graphics     'XP in Siemens SHELXTL (Sheldrick, 1994)'
_computing_publication_material   
;
SHELX97-2 (Sheldrick, 1997) and local procedures
;
 
_refine_special_details 
; 
 Refinement of F^2^ against ALL reflections.  The weighted R-factor wR and 
 goodness of fit S are based on F^2^, conventional R-factors R are based 
 on F, with F set to zero for negative F^2^. The threshold expression of 
 F^2^ > 2sigma(F^2^) is used only for calculating R-factors(gt) etc. and is 
 not relevant to the choice of reflections for refinement.  R-factors based 
 on F^2^ are statistically about twice as large as those based on F, and R- 
 factors based on ALL data will be even larger. 
; 
 
_refine_ls_structure_factor_coef  Fsqd  
_refine_ls_matrix_type            full 
_refine_ls_weighting_scheme       calc  
_refine_ls_weighting_details 
 'calc w=1/[\s^2^(Fo^2^)+(0.0653P)^2^+0.2126P] where P=(Fo^2^+2Fc^2^)/3' 
_atom_sites_solution_primary      direct 
_atom_sites_solution_secondary    difmap 
_atom_sites_solution_hydrogens    geom 
_refine_ls_hydrogen_treatment     mixed 
_refine_ls_extinction_method      none 
_refine_ls_extinction_coef        ? 
_refine_ls_number_reflns          1631 
_refine_ls_number_parameters      101 
_refine_ls_number_restraints      0 
_refine_ls_R_factor_all           0.0508 
_refine_ls_R_factor_gt            0.0402 
_refine_ls_wR_factor_ref          0.1134 
_refine_ls_wR_factor_gt           0.1064 
_refine_ls_goodness_of_fit_ref    1.045 
_refine_ls_restrained_S_all       1.045 
_refine_ls_shift/su_max           0.002 
_refine_ls_shift/su_mean          0.000 
 
loop_ 
 _atom_site_label 
 _atom_site_type_symbol 
 _atom_site_fract_x 
 _atom_site_fract_y 
 _atom_site_fract_z 
 _atom_site_U_iso_or_equiv 
 _atom_site_adp_type 
 _atom_site_occupancy 
 _atom_site_symmetry_multiplicity 
 _atom_site_calc_flag 
 _atom_site_refinement_flags 
 _atom_site_disorder_assembly 
 _atom_site_disorder_group 
C1 C 0.29113(13) 0.12932(17) 0.16111(13) 0.0147(3) Uani 1 1 d . . . 
H1 H 0.3155 0.2484 0.2036 0.018 Uiso 1 1 calc R . . 
O2 O 0.06935(10) 0.15366(13) 0.25971(10) 0.0206(3) Uani 1 1 d . . . 
C2 C 0.14789(13) 0.06696(18) 0.19257(13) 0.0147(3) Uani 1 1 d . . . 
N3 N 0.11929(11) -0.09510(15) 0.13760(11) 0.0147(3) Uani 1 1 d . . . 
H3 H 0.0393 -0.1488 0.1449 0.018 Uiso 1 1 calc R . . 
C4 C 0.22910(13) -0.17792(18) 0.06453(13) 0.0142(3) Uani 1 1 d . . . 
N5 N 0.35614(11) -0.17620(15) 0.15544(11) 0.0146(3) Uani 1 1 d . . . 
H5 H 0.4053 -0.2742 0.1729 0.018 Uiso 1 1 calc R . . 
O6 O 0.49668(9) 0.00683(13) 0.28962(10) 0.0187(3) Uani 1 1 d . . . 
C6 C 0.39291(13) -0.01720(17) 0.21010(13) 0.0139(3) Uani 1 1 d . . . 
C7 C 0.29131(14) 0.13610(19) 0.00406(14) 0.0180(3) Uani 1 1 d . . . 
H7A H 0.2229 0.2257 -0.0331 0.022 Uiso 1 1 calc R . . 
H7B H 0.3838 0.1726 -0.0217 0.022 Uiso 1 1 calc R . . 
C8 C 0.25423(14) -0.05220(19) -0.05460(13) 0.0172(3) Uani 1 1 d . . . 
H8A H 0.1700 -0.0450 -0.1177 0.021 Uiso 1 1 calc R . . 
H8B H 0.3309 -0.0988 -0.1048 0.021 Uiso 1 1 calc R . . 
C9 C 0.19124(14) -0.36855(19) 0.02285(15) 0.0187(3) Uani 1 1 d . . . 
H9A H 0.1716 -0.4384 0.1030 0.028 Uiso 1 1 calc R . . 
H9B H 0.2685 -0.4238 -0.0200 0.028 Uiso 1 1 calc R . . 
H9C H 0.1091 -0.3669 -0.0415 0.028 Uiso 1 1 calc R . . 
 
loop_ 
 _atom_site_aniso_label 
 _atom_site_aniso_U_11 
 _atom_site_aniso_U_22 
 _atom_site_aniso_U_33 
 _atom_site_aniso_U_23 
 _atom_site_aniso_U_13 
 _atom_site_aniso_U_12 
C1 0.0157(6) 0.0126(6) 0.0157(6) -0.0001(5) 0.0010(5) -0.0004(5) 
O2 0.0185(5) 0.0219(6) 0.0220(5) -0.0046(4) 0.0049(4) 0.0045(4) 
C2 0.0156(6) 0.0158(6) 0.0124(6) 0.0018(5) -0.0005(5) 0.0021(5) 
N3 0.0125(5) 0.0155(6) 0.0164(6) -0.0017(4) 0.0033(4) -0.0012(4) 
C4 0.0126(6) 0.0151(6) 0.0149(6) -0.0020(5) 0.0009(5) 0.0004(5) 
N5 0.0143(5) 0.0123(5) 0.0168(6) -0.0008(4) -0.0010(4) 0.0024(4) 
O6 0.0164(5) 0.0175(5) 0.0213(5) 0.0003(4) -0.0035(4) -0.0020(4) 
C6 0.0127(6) 0.0157(6) 0.0138(6) 0.0008(5) 0.0037(5) -0.0015(5) 
C7 0.0197(7) 0.0174(7) 0.0171(7) 0.0037(5) 0.0034(5) -0.0010(5) 
C8 0.0171(6) 0.0203(7) 0.0144(6) 0.0000(5) 0.0028(5) -0.0004(5) 
C9 0.0196(7) 0.0163(7) 0.0199(7) -0.0035(5) 0.0008(5) -0.0013(5) 
 
_geom_special_details 
; 
 All esds (except the esd in the dihedral angle between two l.s. planes) 
 are estimated using the full covariance matrix.  The cell esds are taken 
 into account individually in the estimation of esds in distances, angles 
 and torsion angles; correlations between esds in cell parameters are only 
 used when they are defined by crystal symmetry.  An approximate (isotropic) 
 treatment of cell esds is used for estimating esds involving l.s. planes. 
; 
 
loop_ 
 _geom_bond_atom_site_label_1 
 _geom_bond_atom_site_label_2 
 _geom_bond_distance 
 _geom_bond_site_symmetry_2 
 _geom_bond_publ_flag 
C1 C2 1.5203(18) . ? 
C1 C6 1.5229(18) . ? 
C1 C7 1.5571(19) . ? 
C1 H1 1.0000 . ? 
O2 C2 1.2324(16) . ? 
C2 N3 1.3414(17) . ? 
N3 C4 1.4697(16) . ? 
N3 H3 0.8800 . ? 
C4 N5 1.4675(16) . ? 
C4 C9 1.5124(18) . ? 
C4 C8 1.5399(19) . ? 
N5 C6 1.3362(16) . ? 
N5 H5 0.8800 . ? 
O6 C6 1.2408(16) . ? 
C7 C8 1.5464(19) . ? 
C7 H7A 0.9900 . ? 
C7 H7B 0.9900 . ? 
C8 H8A 0.9900 . ? 
C8 H8B 0.9900 . ? 
C9 H9A 0.9800 . ? 
C9 H9B 0.9800 . ? 
C9 H9C 0.9800 . ? 
 
loop_ 
 _geom_angle_atom_site_label_1 
 _geom_angle_atom_site_label_2 
 _geom_angle_atom_site_label_3 
 _geom_angle 
 _geom_angle_site_symmetry_1 
 _geom_angle_site_symmetry_3 
 _geom_angle_publ_flag 
C2 C1 C6 107.25(10) . . ? 
C2 C1 C7 106.77(11) . . ? 
C6 C1 C7 106.83(11) . . ? 
C2 C1 H1 111.9 . . ? 
C6 C1 H1 111.9 . . ? 
C7 C1 H1 111.9 . . ? 
O2 C2 N3 124.87(12) . . ? 
O2 C2 C1 124.45(12) . . ? 
N3 C2 C1 110.68(11) . . ? 
C2 N3 C4 116.19(10) . . ? 
C2 N3 H3 121.9 . . ? 
C4 N3 H3 121.9 . . ? 
N5 C4 N3 107.46(10) . . ? 
N5 C4 C9 110.46(10) . . ? 
N3 C4 C9 110.91(11) . . ? 
N5 C4 C8 106.79(10) . . ? 
N3 C4 C8 106.78(10) . . ? 
C9 C4 C8 114.11(11) . . ? 
C6 N5 C4 116.14(11) . . ? 
C6 N5 H5 121.9 . . ? 
C4 N5 H5 121.9 . . ? 
O6 C6 N5 124.15(12) . . ? 
O6 C6 C1 124.90(11) . . ? 
N5 C6 C1 110.94(11) . . ? 
C8 C7 C1 109.13(11) . . ? 
C8 C7 H7A 109.9 . . ? 
C1 C7 H7A 109.9 . . ? 
C8 C7 H7B 109.9 . . ? 
C1 C7 H7B 109.9 . . ? 
H7A C7 H7B 108.3 . . ? 
C4 C8 C7 107.88(11) . . ? 
C4 C8 H8A 110.1 . . ? 
C7 C8 H8A 110.1 . . ? 
C4 C8 H8B 110.1 . . ? 
C7 C8 H8B 110.1 . . ? 
H8A C8 H8B 108.4 . . ? 
C4 C9 H9A 109.5 . . ? 
C4 C9 H9B 109.5 . . ? 
H9A C9 H9B 109.5 . . ? 
C4 C9 H9C 109.5 . . ? 
H9A C9 H9C 109.5 . . ? 
H9B C9 H9C 109.5 . . ? 
 
loop_ 
 _geom_torsion_atom_site_label_1 
 _geom_torsion_atom_site_label_2 
 _geom_torsion_atom_site_label_3 
 _geom_torsion_atom_site_label_4 
 _geom_torsion 
 _geom_torsion_site_symmetry_1 
 _geom_torsion_site_symmetry_2 
 _geom_torsion_site_symmetry_3 
 _geom_torsion_site_symmetry_4 
 _geom_torsion_publ_flag 
C6 C1 C2 O2 124.56(13) . . . . ? 
C7 C1 C2 O2 -121.23(14) . . . . ? 
C6 C1 C2 N3 -55.26(14) . . . . ? 
C7 C1 C2 N3 58.95(14) . . . . ? 
O2 C2 N3 C4 -178.24(12) . . . . ? 
C1 C2 N3 C4 1.58(15) . . . . ? 
C2 N3 C4 N5 52.09(14) . . . . ? 
C2 N3 C4 C9 172.93(11) . . . . ? 
C2 N3 C4 C8 -62.18(14) . . . . ? 
N3 C4 N5 C6 -52.48(14) . . . . ? 
C9 C4 N5 C6 -173.59(11) . . . . ? 
C8 C4 N5 C6 61.79(14) . . . . ? 
C4 N5 C6 O6 179.45(12) . . . . ? 
C4 N5 C6 C1 -0.86(15) . . . . ? 
C2 C1 C6 O6 -125.28(13) . . . . ? 
C7 C1 C6 O6 120.54(14) . . . . ? 
C2 C1 C6 N5 55.04(14) . . . . ? 
C7 C1 C6 N5 -59.14(13) . . . . ? 
C2 C1 C7 C8 -57.79(14) . . . . ? 
C6 C1 C7 C8 56.72(13) . . . . ? 
N5 C4 C8 C7 -57.75(13) . . . . ? 
N3 C4 C8 C7 56.97(13) . . . . ? 
C9 C4 C8 C7 179.89(11) . . . . ? 
C1 C7 C8 C4 0.55(14) . . . . ? 
 
_diffrn_measured_fraction_theta_max    0.999 
_diffrn_reflns_theta_full              27.49 
_diffrn_measured_fraction_theta_full   0.999 
_refine_diff_density_max    0.289 
_refine_diff_density_min   -0.321 
_refine_diff_density_rms    0.054 

#===END

 
data_2h 
 
_audit_creation_method            SHELXL-97 
_chemical_name_systematic 
; 
 ? 
; 
_chemical_name_common             ? 
_chemical_melting_point           ? 
_chemical_formula_moiety          ? 
_chemical_formula_sum 
 'C8 H12 N2 O2' 
_chemical_formula_weight          168.20 
 
loop_ 
 _atom_type_symbol 
 _atom_type_description 
 _atom_type_scat_dispersion_real 
 _atom_type_scat_dispersion_imag 
 _atom_type_scat_source 
 'C'  'C'    .0033    .0016 
 'International Tables Vol C Tables 4.2.6.8 and 6.1.1.4' 
 'H'  'H'    .0000    .0000 
 'International Tables Vol C Tables 4.2.6.8 and 6.1.1.4' 
 'N'  'N'    .0061    .0033 
 'International Tables Vol C Tables 4.2.6.8 and 6.1.1.4' 
 'O'  'O'    .0106    .0060 
 'International Tables Vol C Tables 4.2.6.8 and 6.1.1.4' 
 
_symmetry_cell_setting            orthorhombic
_symmetry_space_group_name_H-M    'P nma'
 
loop_ 
 _symmetry_equiv_pos_as_xyz 
 'x, y, z' 
 '-x+1/2, -y, z+1/2' 
 '-x, y+1/2, -z' 
 'x+1/2, -y+1/2, -z+1/2' 
 '-x, -y, -z' 
 'x-1/2, y, -z-1/2' 
 'x, -y-1/2, z' 
 '-x-1/2, y-1/2, z-1/2' 
 
_cell_length_a                    10.535(2) 
_cell_length_b                    9.0614(18) 
_cell_length_c                    8.4297(17) 
_cell_angle_alpha                 90.00 
_cell_angle_beta                  90.00 
_cell_angle_gamma                 90.00 
_cell_volume                      804.7(3) 
_cell_formula_units_Z             4 
_cell_measurement_temperature     90.0(2) 
_cell_measurement_reflns_used     3663
_cell_measurement_theta_min       1.00
_cell_measurement_theta_max       27.48
 
_exptl_crystal_description        block
_exptl_crystal_colour             colourless
_exptl_crystal_size_max           0.40 
_exptl_crystal_size_mid           0.35 
_exptl_crystal_size_min           0.15 
_exptl_crystal_density_meas       ? 
_exptl_crystal_density_diffrn     1.388 
_exptl_crystal_density_method     'not measured' 
_exptl_crystal_F_000              360 
_exptl_absorpt_coefficient_mu     0.101 
_exptl_absorpt_correction_type    none 
_exptl_absorpt_correction_T_min   ? 
_exptl_absorpt_correction_T_max   ? 
_exptl_absorpt_process_details    ? 
 
_exptl_special_details 
; 
 ? 
; 
 
_diffrn_ambient_temperature       90.0(2) 
_diffrn_radiation_wavelength      0.71073 
_diffrn_radiation_type            MoK\a 
_diffrn_radiation_source          'fine-focus sealed tube' 
_diffrn_radiation_monochromator   graphite 
_diffrn_measurement_device_type   'Nonius KappaCCD diffractometer' 
_diffrn_measurement_method        '\w scans at fixed \c = 55\%'
_diffrn_detector_area_resol_mean  18 
_diffrn_standards_number          ?
_diffrn_standards_interval_count  ? 
_diffrn_standards_interval_time   ? 
_diffrn_standards_decay_%         <1
_diffrn_reflns_number             4858 
_diffrn_reflns_av_R_equivalents   0.0488 
_diffrn_reflns_av_sigmaI/netI     0.0420 
_diffrn_reflns_limit_h_min        -13 
_diffrn_reflns_limit_h_max        13 
_diffrn_reflns_limit_k_min        -11 
_diffrn_reflns_limit_k_max        11 
_diffrn_reflns_limit_l_min        -10 
_diffrn_reflns_limit_l_max        10 
_diffrn_reflns_theta_min          3.09 
_diffrn_reflns_theta_max          27.44 
_reflns_number_total              973 
_reflns_number_gt                 740 
_reflns_threshold_expression      >2\s(I) 
 
_computing_data_collection        'COLLECT (Nonius, 1998)' 
_computing_cell_refinement        'SCALEPACK (Otwinowski & Minor, 1997)'
_computing_data_reduction         'DENZO-SMN (Otwinowski & Minor, 1997)'
_computing_structure_solution     'SHELXS-97 (Sheldrick, 1990)' 
_computing_structure_refinement   'SHELXL-97 (Sheldrick, 1997)' 
_computing_molecular_graphics     'XP in Siemens SHELXTL (Sheldrick, 1994)'
_computing_publication_material   
;
SHELX97-2 (Sheldrick, 1997) and local procedures
;
 
_refine_special_details 
; 
 Refinement of F^2^ against ALL reflections.  The weighted R-factor wR and 
 goodness of fit S are based on F^2^, conventional R-factors R are based 
 on F, with F set to zero for negative F^2^. The threshold expression of 
 F^2^ > 2sigma(F^2^) is used only for calculating R-factors(gt) etc. and is 
 not relevant to the choice of reflections for refinement.  R-factors based 
 on F^2^ are statistically about twice as large as those based on F, and R- 
 factors based on ALL data will be even larger. 
; 
 
_refine_ls_structure_factor_coef  Fsqd  
_refine_ls_matrix_type            full 
_refine_ls_weighting_scheme       calc  
_refine_ls_weighting_details 
 'calc w=1/[\s^2^(Fo^2^)+(0.0674P)^2^+0.0211P] where P=(Fo^2^+2Fc^2^)/3' 
_atom_sites_solution_primary      direct 
_atom_sites_solution_secondary    difmap 
_atom_sites_solution_hydrogens    geom 
_refine_ls_hydrogen_treatment     mixed 
_refine_ls_extinction_method      none 
_refine_ls_extinction_coef        ? 
_refine_ls_number_reflns          973 
_refine_ls_number_parameters      66 
_refine_ls_number_restraints      0 
_refine_ls_R_factor_all           0.0608 
_refine_ls_R_factor_gt            0.0413 
_refine_ls_wR_factor_ref          0.1175 
_refine_ls_wR_factor_gt           0.1076 
_refine_ls_goodness_of_fit_ref    1.087 
_refine_ls_restrained_S_all       1.087 
_refine_ls_shift/su_max           1.574 
_refine_ls_shift/su_mean          0.031 
 
loop_ 
 _atom_site_label 
 _atom_site_type_symbol 
 _atom_site_fract_x 
 _atom_site_fract_y 
 _atom_site_fract_z 
 _atom_site_U_iso_or_equiv 
 _atom_site_adp_type 
 _atom_site_occupancy 
 _atom_site_symmetry_multiplicity 
 _atom_site_calc_flag 
 _atom_site_refinement_flags 
 _atom_site_disorder_assembly 
 _atom_site_disorder_group 
N1 N 0.85476(10) 0.38114(12) 0.21539(13) 0.0131(3) Uani 1 1 d . . . 
H1 H 0.8420 0.4528 0.2840 0.016 Uiso 1 1 calc R . . 
O1 O 0.73793(9) 0.48408(11) 0.01483(11) 0.0170(3) Uani 1 1 d . . . 
C1 C 0.80614(12) 0.38554(15) 0.06784(16) 0.0124(3) Uani 1 1 d . . . 
C2 C 0.84725(18) 0.2500 -0.0287(2) 0.0136(5) Uani 1 2 d S . . 
C3 C 0.99539(19) 0.2500 -0.0284(2) 0.0170(5) Uani 1 2 d S . . 
H3A H 1.0270 0.1615 -0.0849 0.020 Uiso 0.50 1 calc PR . . 
H3B H 1.0270 0.3385 -0.0849 0.020 Uiso 0.50 1 calc PR . . 
C4 C 1.04553(19) 0.2500 0.1427(2) 0.0178(5) Uani 1 2 d S . . 
H4A H 1.0984 0.3386 0.1614 0.021 Uiso 0.50 1 calc PR . . 
H4B H 1.0984 0.1614 0.1614 0.021 Uiso 0.50 1 calc PR . . 
C5 C 0.93040(18) 0.2500 0.2557(2) 0.0133(5) Uani 1 2 d S . . 
C6 C 0.96441(19) 0.2500 0.4287(2) 0.0173(5) Uani 1 2 d S . . 
H6A H 1.0027 0.3450 0.4569 0.026 Uiso 0.50 1 calc PR . . 
H6B H 1.0251 0.1705 0.4500 0.026 Uiso 0.50 1 calc PR . . 
H6C H 0.8876 0.2345 0.4922 0.026 Uiso 0.50 1 calc PR . . 
C7 C 0.7913(2) 0.2500 -0.1938(2) 0.0186(5) Uani 1 2 d S . . 
H7A H 0.6985 0.2502 -0.1868 0.028 Uiso 1 2 calc SR . . 
H7B H 0.8195 0.1616 -0.2508 0.028 Uiso 0.50 1 calc PR . . 
H7C H 0.8198 0.3382 -0.2509 0.028 Uiso 0.50 1 calc PR . . 
 
loop_ 
 _atom_site_aniso_label 
 _atom_site_aniso_U_11 
 _atom_site_aniso_U_22 
 _atom_site_aniso_U_33 
 _atom_site_aniso_U_23 
 _atom_site_aniso_U_13 
 _atom_site_aniso_U_12 
N1 0.0162(6) 0.0113(7) 0.0119(7) -0.0027(4) -0.0005(5) 0.0014(5) 
O1 0.0223(6) 0.0145(6) 0.0141(6) 0.0012(4) -0.0008(4) 0.0040(4) 
C1 0.0126(7) 0.0130(7) 0.0117(7) 0.0018(5) 0.0025(5) -0.0021(6) 
C2 0.0162(10) 0.0133(10) 0.0112(10) 0.000 0.0019(8) 0.000 
C3 0.0185(11) 0.0160(11) 0.0164(11) 0.000 0.0059(8) 0.000 
C4 0.0135(10) 0.0220(11) 0.0179(11) 0.000 0.0028(8) 0.000 
C5 0.0124(9) 0.0142(10) 0.0134(10) 0.000 0.0004(8) 0.000 
C6 0.0170(10) 0.0182(11) 0.0166(11) 0.000 -0.0028(8) 0.000 
C7 0.0289(11) 0.0170(11) 0.0099(10) 0.000 0.0015(9) 0.000 
 
_geom_special_details 
; 
 All esds (except the esd in the dihedral angle between two l.s. planes) 
 are estimated using the full covariance matrix.  The cell esds are taken 
 into account individually in the estimation of esds in distances, angles 
 and torsion angles; correlations between esds in cell parameters are only 
 used when they are defined by crystal symmetry.  An approximate (isotropic) 
 treatment of cell esds is used for estimating esds involving l.s. planes. 
; 
 
loop_ 
 _geom_bond_atom_site_label_1 
 _geom_bond_atom_site_label_2 
 _geom_bond_distance 
 _geom_bond_site_symmetry_2 
 _geom_bond_publ_flag 
N1 C1 1.3457(17) . ? 
N1 C5 1.4706(15) . ? 
N1 H1 0.8800 . ? 
O1 C1 1.2302(17) . ? 
C1 C2 1.5358(18) . ? 
C2 C7 1.511(3) . ? 
C2 C1 1.5358(18) 7_565 ? 
C2 C3 1.561(3) . ? 
C3 C4 1.536(3) . ? 
C3 H3A 0.9900 . ? 
C3 H3B 0.9900 . ? 
C4 C5 1.542(3) . ? 
C4 H4A 0.9900 . ? 
C4 H4B 0.9900 . ? 
C5 N1 1.4706(15) 7_565 ? 
C5 C6 1.502(3) . ? 
C6 H6A 0.9811 . ? 
C6 H6B 0.9811 . ? 
C6 H6C 0.9811 . ? 
C7 H7A 0.9803 . ? 
C7 H7B 0.9803 . ? 
C7 H7C 0.9803 . ? 
 
loop_ 
 _geom_angle_atom_site_label_1 
 _geom_angle_atom_site_label_2 
 _geom_angle_atom_site_label_3 
 _geom_angle 
 _geom_angle_site_symmetry_1 
 _geom_angle_site_symmetry_3 
 _geom_angle_publ_flag 
C1 N1 C5 116.34(12) . . ? 
C1 N1 H1 121.8 . . ? 
C5 N1 H1 121.8 . . ? 
O1 C1 N1 125.42(13) . . ? 
O1 C1 C2 123.55(13) . . ? 
N1 C1 C2 111.03(12) . . ? 
C7 C2 C1 112.22(11) . 7_565 ? 
C7 C2 C1 112.22(11) . . ? 
C1 C2 C1 106.20(15) 7_565 . ? 
C7 C2 C3 113.04(16) . . ? 
C1 C2 C3 106.33(11) 7_565 . ? 
C1 C2 C3 106.33(11) . . ? 
C4 C3 C2 110.22(16) . . ? 
C4 C3 H3A 109.6 . . ? 
C2 C3 H3A 109.6 . . ? 
C4 C3 H3B 109.6 . . ? 
C2 C3 H3B 109.6 . . ? 
H3A C3 H3B 108.1 . . ? 
C3 C4 C5 108.03(16) . . ? 
C3 C4 H4A 110.1 . . ? 
C5 C4 H4A 110.1 . . ? 
C3 C4 H4B 110.1 . . ? 
C5 C4 H4B 110.1 . . ? 
H4A C4 H4B 108.4 . . ? 
N1 C5 N1 107.81(14) 7_565 . ? 
N1 C5 C6 110.71(10) 7_565 . ? 
N1 C5 C6 110.71(10) . . ? 
N1 C5 C4 106.47(10) 7_565 . ? 
N1 C5 C4 106.47(11) . . ? 
C6 C5 C4 114.35(17) . . ? 
C5 C6 H6A 109.6 . . ? 
C5 C6 H6B 109.6 . . ? 
H6A C6 H6B 109.4 . . ? 
C5 C6 H6C 109.6 . . ? 
H6A C6 H6C 109.4 . . ? 
H6B C6 H6C 109.4 . . ? 
C2 C7 H7A 109.5 . . ? 
C2 C7 H7B 109.5 . . ? 
H7A C7 H7B 109.4 . . ? 
C2 C7 H7C 109.5 . . ? 
H7A C7 H7C 109.4 . . ? 
H7B C7 H7C 109.4 . . ? 
 
loop_ 
 _geom_torsion_atom_site_label_1 
 _geom_torsion_atom_site_label_2 
 _geom_torsion_atom_site_label_3 
 _geom_torsion_atom_site_label_4 
 _geom_torsion 
 _geom_torsion_site_symmetry_1 
 _geom_torsion_site_symmetry_2 
 _geom_torsion_site_symmetry_3 
 _geom_torsion_site_symmetry_4 
 _geom_torsion_publ_flag 
C5 N1 C1 O1 177.91(13) . . . . ? 
C5 N1 C1 C2 -2.26(17) . . . . ? 
O1 C1 C2 C7 -1.6(2) . . . . ? 
N1 C1 C2 C7 178.57(12) . . . . ? 
O1 C1 C2 C1 -124.57(13) . . . 7_565 ? 
N1 C1 C2 C1 55.61(18) . . . 7_565 ? 
O1 C1 C2 C3 122.47(15) . . . . ? 
N1 C1 C2 C3 -57.36(15) . . . . ? 
C7 C2 C3 C4 180.0 . . . . ? 
C1 C2 C3 C4 -56.44(10) 7_565 . . . ? 
C1 C2 C3 C4 56.44(10) . . . . ? 
C2 C3 C4 C5 0.0 . . . . ? 
C1 N1 C5 N1 -51.46(18) . . . 7_565 ? 
C1 N1 C5 C6 -172.69(12) . . . . ? 
C1 N1 C5 C4 62.46(16) . . . . ? 
C3 C4 C5 N1 57.42(10) . . . 7_565 ? 
C3 C4 C5 N1 -57.42(10) . . . . ? 
C3 C4 C5 C6 180.0 . . . . ? 
 
_diffrn_measured_fraction_theta_max     .998 
_diffrn_reflns_theta_full              27.44 
_diffrn_measured_fraction_theta_full    .998 
_refine_diff_density_max     .287 
_refine_diff_density_min    -.293 
_refine_diff_density_rms     .058 

#===END

 
data_2i 
 
_audit_creation_method            SHELXL-97 
_chemical_name_systematic 
; 
 ? 
; 
_chemical_name_common             ? 
_chemical_melting_point           ? 
_chemical_formula_moiety          ? 
_chemical_formula_sum 
 'C13 H14 N2 O2' 
_chemical_formula_weight          230.26 
 
loop_ 
 _atom_type_symbol 
 _atom_type_description 
 _atom_type_scat_dispersion_real 
 _atom_type_scat_dispersion_imag 
 _atom_type_scat_source 
 'C'  'C'   0.0033   0.0016 
 'International Tables Vol C Tables 4.2.6.8 and 6.1.1.4' 
 'H'  'H'   0.0000   0.0000 
 'International Tables Vol C Tables 4.2.6.8 and 6.1.1.4' 
 'N'  'N'   0.0061   0.0033 
 'International Tables Vol C Tables 4.2.6.8 and 6.1.1.4' 
 'O'  'O'   0.0106   0.0060 
 'International Tables Vol C Tables 4.2.6.8 and 6.1.1.4' 
 
_symmetry_cell_setting            orthorhombic
_symmetry_space_group_name_H-M    'P nma'
 
loop_ 
 _symmetry_equiv_pos_as_xyz 
 'x, y, z' 
 '-x+1/2, -y, z+1/2' 
 'x+1/2, -y+1/2, -z+1/2' 
 '-x, y+1/2, -z' 
 '-x, -y, -z' 
 'x-1/2, y, -z-1/2' 
 '-x-1/2, y-1/2, z-1/2' 
 'x, -y-1/2, z' 
 
_cell_length_a                    15.4460(6) 
_cell_length_b                    9.9980(8) 
_cell_length_c                    6.8770(14) 
_cell_angle_alpha                 90.00 
_cell_angle_beta                  90.00 
_cell_angle_gamma                 90.00 
_cell_volume                      1062.0(2) 
_cell_formula_units_Z             4 
_cell_measurement_temperature     90.0(2) 
_cell_measurement_reflns_used     6572 
_cell_measurement_theta_min       1.00
_cell_measurement_theta_max       27.48
 
_exptl_crystal_description        plate
_exptl_crystal_colour             colourless
_exptl_crystal_size_max           0.35 
_exptl_crystal_size_mid           0.25 
_exptl_crystal_size_min           0.03 
_exptl_crystal_density_meas       ? 
_exptl_crystal_density_diffrn     1.440 
_exptl_crystal_density_method     'not measured' 
_exptl_crystal_F_000              488 
_exptl_absorpt_coefficient_mu     0.099 
_exptl_absorpt_correction_type    none
_exptl_absorpt_correction_T_min   ? 
_exptl_absorpt_correction_T_max   ? 
_exptl_absorpt_process_details    ? 
 
_exptl_special_details 
; 
 ? 
; 
 
_diffrn_ambient_temperature       90.0(2) 
_diffrn_radiation_wavelength      0.71073 
_diffrn_radiation_type            MoK\a 
_diffrn_radiation_source          'fine-focus sealed tube' 
_diffrn_radiation_monochromator   graphite 
_diffrn_measurement_device_type   'Nonius KappaCCD diffractometer' 
_diffrn_measurement_method        '\w scans at fixed \c = 55\%'
_diffrn_detector_area_resol_mean  18 
_diffrn_standards_number          ?
_diffrn_standards_interval_count  ? 
_diffrn_standards_interval_time   ? 
_diffrn_standards_decay_%         <1
_diffrn_reflns_number             6968 
_diffrn_reflns_av_R_equivalents   0.1166 
_diffrn_reflns_av_sigmaI/netI     0.0987 
_diffrn_reflns_limit_h_min        -16 
_diffrn_reflns_limit_h_max        19 
_diffrn_reflns_limit_k_min        -12 
_diffrn_reflns_limit_k_max        12 
_diffrn_reflns_limit_l_min        -8 
_diffrn_reflns_limit_l_max        8 
_diffrn_reflns_theta_min          2.64 
_diffrn_reflns_theta_max          27.43 
_reflns_number_total              1276 
_reflns_number_gt                 768 
_reflns_threshold_expression      >2\s(I) 
 
_computing_data_collection        'COLLECT (Nonius, 1998)' 
_computing_cell_refinement        'SCALEPACK (Otwinowski & Minor, 1997)'
_computing_data_reduction         'DENZO-SMN (Otwinowski & Minor, 1997)'
_computing_structure_solution     'SHELXS-97 (Sheldrick, 1990)' 
_computing_structure_refinement   'SHELXL-97 (Sheldrick, 1997)' 
_computing_molecular_graphics     'XP in Siemens SHELXTL (Sheldrick, 1994)'
_computing_publication_material   
;
SHELX97-2 (Sheldrick, 1997) and local procedures
;
 
_refine_special_details 
; 
 Refinement of F^2^ against ALL reflections.  The weighted R-factor wR and 
 goodness of fit S are based on F^2^, conventional R-factors R are based 
 on F, with F set to zero for negative F^2^. The threshold expression of 
 F^2^ > 2sigma(F^2^) is used only for calculating R-factors(gt) etc. and is 
 not relevant to the choice of reflections for refinement.  R-factors based 
 on F^2^ are statistically about twice as large as those based on F, and R- 
 factors based on ALL data will be even larger. 
; 
 
_refine_ls_structure_factor_coef  Fsqd  
_refine_ls_matrix_type            full 
_refine_ls_weighting_scheme       calc  
_refine_ls_weighting_details 
 'calc w=1/[\s^2^(Fo^2^)+(0.0470P)^2^+0.0000P] where P=(Fo^2^+2Fc^2^)/3' 
_atom_sites_solution_primary      direct 
_atom_sites_solution_secondary    difmap 
_atom_sites_solution_hydrogens    geom 
_refine_ls_hydrogen_treatment     mixed 
_refine_ls_extinction_method      none 
_refine_ls_extinction_coef        ? 
_refine_ls_number_reflns          1276 
_refine_ls_number_parameters      89 
_refine_ls_number_restraints      0 
_refine_ls_R_factor_all           0.1023 
_refine_ls_R_factor_gt            0.0499 
_refine_ls_wR_factor_ref          0.1112 
_refine_ls_wR_factor_gt           0.0950 
_refine_ls_goodness_of_fit_ref    0.976 
_refine_ls_restrained_S_all       0.976 
_refine_ls_shift/su_max           0.247 
_refine_ls_shift/su_mean          0.005 
 
loop_ 
 _atom_site_label 
 _atom_site_type_symbol 
 _atom_site_fract_x 
 _atom_site_fract_y 
 _atom_site_fract_z 
 _atom_site_U_iso_or_equiv 
 _atom_site_adp_type 
 _atom_site_occupancy 
 _atom_site_symmetry_multiplicity 
 _atom_site_calc_flag 
 _atom_site_refinement_flags 
 _atom_site_disorder_assembly 
 _atom_site_disorder_group 
C1 C 0.26095(17) 0.2500 0.2985(4) 0.0136(6) Uani 1 2 d S . . 
O2 O 0.20400(8) 0.03581(13) 0.18140(18) 0.0187(4) Uani 1 1 d . . . 
C2 C 0.25748(12) 0.12745(19) 0.1656(3) 0.0142(5) Uani 1 1 d . . . 
N3 N 0.31936(9) 0.13172(15) 0.0274(2) 0.0146(4) Uani 1 1 d . . . 
H3 H 0.3256 0.0676 -0.0592 0.017 Uiso 1 1 calc R . . 
C4 C 0.37564(17) 0.2500 0.0302(4) 0.0143(6) Uani 1 2 d S . . 
C5 C 0.35260(16) 0.2500 0.3908(4) 0.0160(7) Uani 1 2 d S . . 
H5A H 0.3597 0.3302 0.4737 0.019 Uiso 0.50 1 calc PR . . 
H5B H 0.3597 0.1698 0.4737 0.019 Uiso 0.50 1 calc PR . . 
C6 C 0.42202(17) 0.2500 0.2296(3) 0.0173(7) Uani 1 2 d S . . 
H6A H 0.4591 0.1697 0.2417 0.021 Uiso 0.50 1 calc PR . . 
H6B H 0.4591 0.3303 0.2417 0.021 Uiso 0.50 1 calc PR . . 
C7 C 0.44183(17) 0.2500 -0.1323(4) 0.0143(6) Uani 1 2 d S . . 
C8 C 0.47599(12) 0.37022(19) -0.2003(3) 0.0167(5) Uani 1 1 d . . . 
H8 H 0.4540 0.4527 -0.1529 0.020 Uiso 1 1 calc R . . 
C9 C 0.54217(12) 0.36973(19) -0.3372(3) 0.0186(5) Uani 1 1 d . . . 
H9 H 0.5649 0.4519 -0.3841 0.022 Uiso 1 1 calc R . . 
C10 C 0.57495(17) 0.2500 -0.4053(4) 0.0181(7) Uani 1 2 d S . . 
H10 H 0.6201 0.2500 -0.4991 0.022 Uiso 1 2 calc SR . . 
C11 C 0.18995(17) 0.2500 0.4509(4) 0.0195(7) Uani 1 2 d S . . 
H11A H 0.1333 0.2482 0.3866 0.029 Uiso 1 2 calc SR . . 
H11B H 0.1946 0.3309 0.5306 0.029 Uiso 0.50 1 calc PR . . 
H11C H 0.1960 0.1709 0.5339 0.029 Uiso 0.50 1 calc PR . . 
 
loop_ 
 _atom_site_aniso_label 
 _atom_site_aniso_U_11 
 _atom_site_aniso_U_22 
 _atom_site_aniso_U_33 
 _atom_site_aniso_U_23 
 _atom_site_aniso_U_13 
 _atom_site_aniso_U_12 
C1 0.0164(15) 0.0117(14) 0.0127(15) 0.000 0.0010(12) 0.000 
O2 0.0201(8) 0.0153(7) 0.0205(9) 0.0009(6) 0.0000(6) -0.0031(6) 
C2 0.0153(11) 0.0132(11) 0.0141(11) 0.0040(9) -0.0033(8) 0.0002(9) 
N3 0.0188(9) 0.0100(8) 0.0149(9) -0.0044(7) 0.0031(7) -0.0039(8) 
C4 0.0166(15) 0.0103(14) 0.0160(16) 0.000 0.0023(12) 0.000 
C5 0.0215(16) 0.0121(15) 0.0143(16) 0.000 -0.0034(12) 0.000 
C6 0.0167(16) 0.0164(15) 0.0188(17) 0.000 -0.0010(12) 0.000 
C7 0.0156(15) 0.0146(15) 0.0126(15) 0.000 -0.0038(11) 0.000 
C8 0.0178(11) 0.0150(11) 0.0175(11) -0.0008(9) -0.0010(9) 0.0030(9) 
C9 0.0188(11) 0.0162(11) 0.0209(12) 0.0029(9) -0.0009(9) -0.0025(9) 
C10 0.0163(15) 0.0212(17) 0.0168(16) 0.000 0.0022(12) 0.000 
C11 0.0243(16) 0.0154(16) 0.0189(17) 0.000 0.0045(13) 0.000 
 
_geom_special_details 
; 
 All esds (except the esd in the dihedral angle between two l.s. planes) 
 are estimated using the full covariance matrix.  The cell esds are taken 
 into account individually in the estimation of esds in distances, angles 
 and torsion angles; correlations between esds in cell parameters are only 
 used when they are defined by crystal symmetry.  An approximate (isotropic) 
 treatment of cell esds is used for estimating esds involving l.s. planes. 
; 
 
loop_ 
 _geom_bond_atom_site_label_1 
 _geom_bond_atom_site_label_2 
 _geom_bond_distance 
 _geom_bond_site_symmetry_2 
 _geom_bond_publ_flag 
C1 C11 1.517(3) . ? 
C1 C2 1.529(2) . ? 
C1 C2 1.529(2) 8_565 ? 
C1 C5 1.551(3) . ? 
O2 C2 1.238(2) . ? 
C2 N3 1.349(2) . ? 
N3 C4 1.468(2) . ? 
N3 H3 0.8800 . ? 
C4 N3 1.468(2) 8_565 ? 
C4 C7 1.515(3) . ? 
C4 C6 1.547(3) . ? 
C5 C6 1.542(3) . ? 
C5 H5A 0.9900 . ? 
C5 H5B 0.9900 . ? 
C6 H6A 0.9900 . ? 
C6 H6B 0.9900 . ? 
C7 C8 1.393(2) . ? 
C7 C8 1.393(2) 8_565 ? 
C8 C9 1.390(2) . ? 
C8 H8 0.9500 . ? 
C9 C10 1.382(2) . ? 
C9 H9 0.9500 . ? 
C10 C9 1.382(2) 8_565 ? 
C10 H10 0.9500 . ? 
C11 H11A 0.9801 . ? 
C11 H11B 0.9801 . ? 
C11 H11C 0.9801 . ? 
 
loop_ 
 _geom_angle_atom_site_label_1 
 _geom_angle_atom_site_label_2 
 _geom_angle_atom_site_label_3 
 _geom_angle 
 _geom_angle_site_symmetry_1 
 _geom_angle_site_symmetry_3 
 _geom_angle_publ_flag 
C11 C1 C2 112.79(14) . . ? 
C11 C1 C2 112.79(14) . 8_565 ? 
C2 C1 C2 106.5(2) . 8_565 ? 
C11 C1 C5 112.1(2) . . ? 
C2 C1 C5 106.04(14) . . ? 
C2 C1 C5 106.04(15) 8_565 . ? 
O2 C2 N3 123.90(17) . . ? 
O2 C2 C1 124.32(18) . . ? 
N3 C2 C1 111.77(17) . . ? 
C2 N3 C4 115.82(16) . . ? 
C2 N3 H3 122.1 . . ? 
C4 N3 H3 122.1 . . ? 
N3 C4 N3 107.4(2) 8_565 . ? 
N3 C4 C7 112.94(13) 8_565 . ? 
N3 C4 C7 112.94(13) . . ? 
N3 C4 C6 106.63(14) 8_565 . ? 
N3 C4 C6 106.63(14) . . ? 
C7 C4 C6 110.0(2) . . ? 
C6 C5 C1 109.9(2) . . ? 
C6 C5 H5A 109.7 . . ? 
C1 C5 H5A 109.7 . . ? 
C6 C5 H5B 109.7 . . ? 
C1 C5 H5B 109.7 . . ? 
H5A C5 H5B 108.2 . . ? 
C5 C6 C4 108.4(2) . . ? 
C5 C6 H6A 110.0 . . ? 
C4 C6 H6A 110.0 . . ? 
C5 C6 H6B 110.0 . . ? 
C4 C6 H6B 110.0 . . ? 
H6A C6 H6B 108.4 . . ? 
C8 C7 C8 119.2(2) . 8_565 ? 
C8 C7 C4 120.20(12) . . ? 
C8 C7 C4 120.20(12) 8_565 . ? 
C9 C8 C7 120.17(19) . . ? 
C9 C8 H8 119.9 . . ? 
C7 C8 H8 119.9 . . ? 
C10 C9 C8 120.2(2) . . ? 
C10 C9 H9 119.9 . . ? 
C8 C9 H9 119.9 . . ? 
C9 C10 C9 120.1(3) 8_565 . ? 
C9 C10 H10 120.0 8_565 . ? 
C9 C10 H10 120.0 . . ? 
C1 C11 H11A 109.5 . . ? 
C1 C11 H11B 109.5 . . ? 
H11A C11 H11B 109.5 . . ? 
C1 C11 H11C 109.5 . . ? 
H11A C11 H11C 109.5 . . ? 
H11B C11 H11C 109.5 . . ? 
 
loop_ 
 _geom_torsion_atom_site_label_1 
 _geom_torsion_atom_site_label_2 
 _geom_torsion_atom_site_label_3 
 _geom_torsion_atom_site_label_4 
 _geom_torsion 
 _geom_torsion_site_symmetry_1 
 _geom_torsion_site_symmetry_2 
 _geom_torsion_site_symmetry_3 
 _geom_torsion_site_symmetry_4 
 _geom_torsion_publ_flag 
C11 C1 C2 O2 -1.4(3) . . . . ? 
C2 C1 C2 O2 -125.66(17) 8_565 . . . ? 
C5 C1 C2 O2 121.7(2) . . . . ? 
C11 C1 C2 N3 177.96(16) . . . . ? 
C2 C1 C2 N3 53.7(2) 8_565 . . . ? 
C5 C1 C2 N3 -58.9(2) . . . . ? 
O2 C2 N3 C4 178.86(18) . . . . ? 
C1 C2 N3 C4 -0.5(2) . . . . ? 
C2 N3 C4 N3 -53.2(2) . . . 8_565 ? 
C2 N3 C4 C7 -178.35(16) . . . . ? 
C2 N3 C4 C6 60.8(2) . . . . ? 
C11 C1 C5 C6 180.0 . . . . ? 
C2 C1 C5 C6 56.48(13) . . . . ? 
C2 C1 C5 C6 -56.48(13) 8_565 . . . ? 
C1 C5 C6 C4 0.0 . . . . ? 
N3 C4 C6 C5 57.23(13) 8_565 . . . ? 
N3 C4 C6 C5 -57.23(13) . . . . ? 
C7 C4 C6 C5 180.0 . . . . ? 
N3 C4 C7 C8 32.5(3) 8_565 . . . ? 
N3 C4 C7 C8 154.55(19) . . . . ? 
C6 C4 C7 C8 -86.5(2) . . . . ? 
N3 C4 C7 C8 -154.55(19) 8_565 . . 8_565 ? 
N3 C4 C7 C8 -32.5(3) . . . 8_565 ? 
C6 C4 C7 C8 86.5(2) . . . 8_565 ? 
C8 C7 C8 C9 1.3(4) 8_565 . . . ? 
C4 C7 C8 C9 174.3(2) . . . . ? 
C7 C8 C9 C10 -0.6(3) . . . . ? 
C8 C9 C10 C9 -0.1(4) . . . 8_565 ? 
 
_diffrn_measured_fraction_theta_max    0.999 
_diffrn_reflns_theta_full              27.43 
_diffrn_measured_fraction_theta_full   0.999 
_refine_diff_density_max    0.272 
_refine_diff_density_min   -0.292 
_refine_diff_density_rms    0.062 

#===END

 
data_2j 
 
_audit_creation_method            SHELXL-97 
_chemical_name_systematic 
; 
 ? 
; 
_chemical_name_common             ? 
_chemical_melting_point           ? 
_chemical_formula_moiety          ? 
_chemical_formula_sum 
 'C14 H16 N2 O2' 
_chemical_formula_weight          244.29 
 
loop_ 
 _atom_type_symbol 
 _atom_type_description 
 _atom_type_scat_dispersion_real 
 _atom_type_scat_dispersion_imag 
 _atom_type_scat_source 
 'C'  'C'    .0033    .0016 
 'International Tables Vol C Tables 4.2.6.8 and 6.1.1.4' 
 'H'  'H'    .0000    .0000 
 'International Tables Vol C Tables 4.2.6.8 and 6.1.1.4' 
 'N'  'N'    .0061    .0033 
 'International Tables Vol C Tables 4.2.6.8 and 6.1.1.4' 
 'O'  'O'    .0106    .0060 
 'International Tables Vol C Tables 4.2.6.8 and 6.1.1.4' 
 
_symmetry_cell_setting            monoclinic
_symmetry_space_group_name_H-M    'P 21/c'
 
loop_ 
 _symmetry_equiv_pos_as_xyz 
 'x, y, z' 
 '-x, y+1/2, -z+1/2' 
 '-x, -y, -z' 
 'x, -y-1/2, z-1/2' 
 
_cell_length_a                    11.6270(5) 
_cell_length_b                    9.5935(5) 
_cell_length_c                    12.1741(5) 
_cell_angle_alpha                 90.00 
_cell_angle_beta                  117.990(2) 
_cell_angle_gamma                 90.00 
_cell_volume                      1199.10(9) 
_cell_formula_units_Z             4 
_cell_measurement_temperature     90.0(2) 
_cell_measurement_reflns_used     9718
_cell_measurement_theta_min       1.00
_cell_measurement_theta_max       27.48
 
_exptl_crystal_description        block
_exptl_crystal_colour             colourless
_exptl_crystal_size_max           0.25 
_exptl_crystal_size_mid           0.20 
_exptl_crystal_size_min           0.15 
_exptl_crystal_density_meas       ? 
_exptl_crystal_density_diffrn     1.353 
_exptl_crystal_density_method     'not measured' 
_exptl_crystal_F_000              520 
_exptl_absorpt_coefficient_mu     0.092 
_exptl_absorpt_correction_type    none
_exptl_absorpt_correction_T_min   ? 
_exptl_absorpt_correction_T_max   ? 
_exptl_absorpt_process_details    ? 
 
_exptl_special_details 
; 
 ? 
; 
 
_diffrn_ambient_temperature       90.0(2) 
_diffrn_radiation_wavelength      0.71073 
_diffrn_radiation_type            MoK\a 
_diffrn_radiation_source          'fine-focus sealed tube' 
_diffrn_radiation_monochromator   graphite 
_diffrn_measurement_device_type   'Nonius KappaCCD diffractometer' 
_diffrn_measurement_method        '\w scans at fixed \c = 55\%'
_diffrn_detector_area_resol_mean  18 
_diffrn_standards_number          ?
_diffrn_standards_interval_count  ? 
_diffrn_standards_interval_time   ? 
_diffrn_standards_decay_%         <1
_diffrn_reflns_number             7200 
_diffrn_reflns_av_R_equivalents   0.0515 
_diffrn_reflns_av_sigmaI/netI     0.0545 
_diffrn_reflns_limit_h_min        -13 
_diffrn_reflns_limit_h_max        13 
_diffrn_reflns_limit_k_min        -11 
_diffrn_reflns_limit_k_max        11 
_diffrn_reflns_limit_l_min        -14 
_diffrn_reflns_limit_l_max        14 
_diffrn_reflns_theta_min          1.98 
_diffrn_reflns_theta_max          24.99 
_reflns_number_total              2109 
_reflns_number_gt                 1657 
_reflns_threshold_expression      >2sigma(I) 
 
_computing_data_collection        'COLLECT (Nonius, 1998)' 
_computing_cell_refinement        'SCALEPACK (Otwinowski & Minor, 1997)'
_computing_data_reduction         'DENZO-SMN (Otwinowski & Minor, 1997)'
_computing_structure_solution     'SHELXS-97 (Sheldrick, 1990)' 
_computing_structure_refinement   'SHELXL-97 (Sheldrick, 1997)' 
_computing_molecular_graphics     'XP in Siemens SHELXTL (Sheldrick, 1994)'
_computing_publication_material   
;
SHELX97-2 (Sheldrick, 1997) and local procedures
;
 
_refine_special_details 
; 
 Refinement of F^2^ against ALL reflections.  The weighted R-factor wR and 
 goodness of fit S are based on F^2^, conventional R-factors R are based 
 on F, with F set to zero for negative F^2^. The threshold expression of 
 F^2^ > 2sigma(F^2^) is used only for calculating R-factors(gt) etc. and is 
 not relevant to the choice of reflections for refinement.  R-factors based 
 on F^2^ are statistically about twice as large as those based on F, and R- 
 factors based on ALL data will be even larger. 
; 
 
_refine_ls_structure_factor_coef  Fsqd  
_refine_ls_matrix_type            full 
_refine_ls_weighting_scheme       calc  
_refine_ls_weighting_details 
 'calc w=1/[\s^2^(Fo^2^)+(0.0333P)^2^+0.2955P] where P=(Fo^2^+2Fc^2^)/3' 
_atom_sites_solution_primary      direct 
_atom_sites_solution_secondary    difmap 
_atom_sites_solution_hydrogens    geom 
_refine_ls_hydrogen_treatment     mixed 
_refine_ls_extinction_method      SHELXL 
_refine_ls_extinction_coef        0.0093(18) 
_refine_ls_extinction_expression 
 'Fc^*^=kFc[1+0.001xFc^2^\l^3^/sin(2\q)]^-1/4^' 
_refine_ls_number_reflns          2109 
_refine_ls_number_parameters      165 
_refine_ls_number_restraints      0 
_refine_ls_R_factor_all           0.0651 
_refine_ls_R_factor_gt            0.0443 
_refine_ls_wR_factor_ref          0.0906 
_refine_ls_wR_factor_gt           0.0844 
_refine_ls_goodness_of_fit_ref    1.067 
_refine_ls_restrained_S_all       1.067 
_refine_ls_shift/su_max           0.000 
_refine_ls_shift/su_mean          0.000 
 
loop_ 
 _atom_site_label 
 _atom_site_type_symbol 
 _atom_site_fract_x 
 _atom_site_fract_y 
 _atom_site_fract_z 
 _atom_site_U_iso_or_equiv 
 _atom_site_adp_type 
 _atom_site_occupancy 
 _atom_site_symmetry_multiplicity 
 _atom_site_calc_flag 
 _atom_site_refinement_flags 
 _atom_site_disorder_assembly 
 _atom_site_disorder_group 
O1 O 0.11763(10) 0.12232(12) 0.10876(10) 0.0152(3) Uani 1 1 d . . . 
C1 C 0.28628(15) 0.18073(18) 0.04789(15) 0.0119(4) Uani 1 1 d . . . 
C2 C 0.15651(16) 0.11944(17) 0.02935(15) 0.0120(4) Uani 1 1 d . . . 
N3 N 0.08958(13) 0.06108(14) -0.08262(11) 0.0133(4) Uani 1 1 d . . . 
H3 H 0.0147 0.0188 -0.1048 0.016 Uiso 1 1 calc R . . 
C4 C 0.14721(16) 0.07099(18) -0.16694(14) 0.0135(4) Uani 1 1 d . . . 
N5 N 0.17708(13) 0.21832(14) -0.17045(12) 0.0140(4) Uani 1 1 d . . . 
H5 H 0.1479 0.2636 -0.2414 0.017 Uiso 1 1 calc R . . 
O6 O 0.28607(11) 0.40430(13) -0.04916(10) 0.0190(3) Uani 1 1 d . . . 
C6 C 0.25101(15) 0.28247(19) -0.06096(15) 0.0134(4) Uani 1 1 d . . . 
C7 C 0.36008(16) 0.05740(18) 0.02462(14) 0.0141(4) Uani 1 1 d . . . 
H7A H 0.4428 0.0920 0.0300 0.017 Uiso 1 1 calc R . . 
H7B H 0.3815 -0.0143 0.0899 0.017 Uiso 1 1 calc R . . 
C8 C 0.27668(15) -0.00846(18) -0.10414(15) 0.0147(4) Uani 1 1 d . . . 
H8A H 0.3223 -0.0017 -0.1551 0.018 Uiso 1 1 calc R . . 
H8B H 0.2608 -0.1081 -0.0951 0.018 Uiso 1 1 calc R . . 
C9 C 0.05181(16) 0.01991(19) -0.29523(15) 0.0178(4) Uani 1 1 d . . . 
H9A H -0.0278 0.0761 -0.3275 0.027 Uiso 1 1 calc R . . 
H9B H 0.0305 -0.0780 -0.2905 0.027 Uiso 1 1 calc R . . 
H9C H 0.0909 0.0285 -0.3508 0.027 Uiso 1 1 calc R . . 
C10 C 0.36129(15) 0.24877(19) 0.17598(14) 0.0154(4) Uani 1 1 d . . . 
H10A H 0.3284 0.3451 0.1701 0.018 Uiso 1 1 calc R . . 
H10B H 0.3399 0.1976 0.2347 0.018 Uiso 1 1 calc R . . 
C11 C 0.50837(16) 0.25557(18) 0.23204(15) 0.0132(4) Uani 1 1 d . . . 
C12 C 0.57160(17) 0.33652(17) 0.18131(15) 0.0144(4) Uani 1 1 d . . . 
H12 H 0.5216 0.3855 0.1058 0.017 Uiso 1 1 calc R . . 
C13 C 0.70598(16) 0.34636(19) 0.23954(15) 0.0164(4) Uani 1 1 d . . . 
H13 H 0.7474 0.4027 0.2043 0.020 Uiso 1 1 calc R . . 
C14 C 0.78057(16) 0.27433(18) 0.34925(15) 0.0176(4) Uani 1 1 d . . . 
H14 H 0.8728 0.2819 0.3897 0.021 Uiso 1 1 calc R . . 
C15 C 0.71945(16) 0.19136(19) 0.39917(16) 0.0186(5) Uani 1 1 d . . . 
H15 H 0.7699 0.1401 0.4732 0.022 Uiso 1 1 calc R . . 
C16 C 0.58474(16) 0.18291(18) 0.34135(15) 0.0162(4) Uani 1 1 d . . . 
H16 H 0.5438 0.1265 0.3770 0.019 Uiso 1 1 calc R . . 
 
loop_ 
 _atom_site_aniso_label 
 _atom_site_aniso_U_11 
 _atom_site_aniso_U_22 
 _atom_site_aniso_U_33 
 _atom_site_aniso_U_23 
 _atom_site_aniso_U_13 
 _atom_site_aniso_U_12 
O1 0.0148(7) 0.0189(7) 0.0144(6) -0.0014(5) 0.0089(5) -0.0013(5) 
C1 0.0099(9) 0.0134(10) 0.0129(9) -0.0003(7) 0.0056(7) 0.0004(8) 
C2 0.0117(9) 0.0113(10) 0.0127(9) 0.0038(7) 0.0055(8) 0.0042(8) 
N3 0.0081(7) 0.0184(9) 0.0122(8) -0.0027(6) 0.0038(6) -0.0035(6) 
C4 0.0144(9) 0.0157(10) 0.0124(9) -0.0009(7) 0.0080(8) -0.0007(8) 
N5 0.0152(8) 0.0142(9) 0.0103(8) 0.0032(6) 0.0041(6) 0.0009(7) 
O6 0.0213(7) 0.0129(8) 0.0213(7) 0.0009(5) 0.0087(6) -0.0023(6) 
C6 0.0090(9) 0.0160(11) 0.0175(10) 0.0002(8) 0.0081(8) 0.0014(8) 
C7 0.0120(9) 0.0157(10) 0.0140(9) 0.0020(7) 0.0056(7) 0.0012(8) 
C8 0.0140(10) 0.0151(10) 0.0163(9) -0.0007(7) 0.0082(8) 0.0008(8) 
C9 0.0156(10) 0.0213(11) 0.0167(10) -0.0016(8) 0.0077(8) -0.0008(8) 
C10 0.0147(10) 0.0175(10) 0.0142(9) -0.0025(8) 0.0070(8) -0.0014(8) 
C11 0.0135(9) 0.0119(9) 0.0129(9) -0.0040(7) 0.0052(8) -0.0008(8) 
C12 0.0178(10) 0.0116(10) 0.0127(9) -0.0006(7) 0.0062(8) 0.0013(8) 
C13 0.0178(10) 0.0148(11) 0.0206(10) -0.0047(8) 0.0125(8) -0.0047(8) 
C14 0.0112(10) 0.0174(11) 0.0219(10) -0.0055(8) 0.0058(8) -0.0020(8) 
C15 0.0171(10) 0.0155(11) 0.0156(9) 0.0011(8) 0.0013(8) 0.0006(8) 
C16 0.0172(10) 0.0149(10) 0.0158(9) -0.0016(8) 0.0073(8) -0.0047(8) 
 
_geom_special_details 
; 
 All esds (except the esd in the dihedral angle between two l.s. planes) 
 are estimated using the full covariance matrix.  The cell esds are taken 
 into account individually in the estimation of esds in distances, angles 
 and torsion angles; correlations between esds in cell parameters are only 
 used when they are defined by crystal symmetry.  An approximate (isotropic) 
 treatment of cell esds is used for estimating esds involving l.s. planes. 
; 
 
loop_ 
 _geom_bond_atom_site_label_1 
 _geom_bond_atom_site_label_2 
 _geom_bond_distance 
 _geom_bond_site_symmetry_2 
 _geom_bond_publ_flag 
O1 C2 1.2450(19) . ? 
C1 C10 1.530(2) . ? 
C1 C2 1.534(2) . ? 
C1 C6 1.538(2) . ? 
C1 C7 1.564(2) . ? 
C2 N3 1.335(2) . ? 
N3 C4 1.469(2) . ? 
N3 H3 0.8800 . ? 
C4 N5 1.461(2) . ? 
C4 C9 1.511(2) . ? 
C4 C8 1.533(2) . ? 
N5 C6 1.349(2) . ? 
N5 H5 0.8800 . ? 
O6 C6 1.224(2) . ? 
C7 C8 1.539(2) . ? 
C7 H7A 0.9900 . ? 
C7 H7B 0.9900 . ? 
C8 H8A 0.9900 . ? 
C8 H8B 0.9900 . ? 
C9 H9A 0.9800 . ? 
C9 H9B 0.9800 . ? 
C9 H9C 0.9800 . ? 
C10 C11 1.516(2) . ? 
C10 H10A 0.9900 . ? 
C10 H10B 0.9900 . ? 
C11 C16 1.391(2) . ? 
C11 C12 1.397(2) . ? 
C12 C13 1.383(2) . ? 
C12 H12 0.9500 . ? 
C13 C14 1.388(2) . ? 
C13 H13 0.9500 . ? 
C14 C15 1.383(2) . ? 
C14 H14 0.9500 . ? 
C15 C16 1.386(2) . ? 
C15 H15 0.9500 . ? 
C16 H16 0.9500 . ? 
 
loop_ 
 _geom_angle_atom_site_label_1 
 _geom_angle_atom_site_label_2 
 _geom_angle_atom_site_label_3 
 _geom_angle 
 _geom_angle_site_symmetry_1 
 _geom_angle_site_symmetry_3 
 _geom_angle_publ_flag 
C10 C1 C2 111.36(13) . . ? 
C10 C1 C6 113.65(14) . . ? 
C2 C1 C6 105.68(13) . . ? 
C10 C1 C7 114.12(13) . . ? 
C2 C1 C7 105.59(13) . . ? 
C6 C1 C7 105.73(13) . . ? 
O1 C2 N3 123.52(15) . . ? 
O1 C2 C1 124.59(14) . . ? 
N3 C2 C1 111.89(14) . . ? 
C2 N3 C4 116.62(13) . . ? 
C2 N3 H3 121.7 . . ? 
C4 N3 H3 121.7 . . ? 
N5 C4 N3 106.01(13) . . ? 
N5 C4 C9 110.66(14) . . ? 
N3 C4 C9 110.30(13) . . ? 
N5 C4 C8 107.71(13) . . ? 
N3 C4 C8 106.41(13) . . ? 
C9 C4 C8 115.27(14) . . ? 
C6 N5 C4 117.56(13) . . ? 
C6 N5 H5 121.2 . . ? 
C4 N5 H5 121.2 . . ? 
O6 C6 N5 125.06(15) . . ? 
O6 C6 C1 124.43(14) . . ? 
N5 C6 C1 110.51(14) . . ? 
C8 C7 C1 110.99(13) . . ? 
C8 C7 H7A 109.4 . . ? 
C1 C7 H7A 109.4 . . ? 
C8 C7 H7B 109.4 . . ? 
C1 C7 H7B 109.4 . . ? 
H7A C7 H7B 108.0 . . ? 
C4 C8 C7 107.79(13) . . ? 
C4 C8 H8A 110.1 . . ? 
C7 C8 H8A 110.1 . . ? 
C4 C8 H8B 110.1 . . ? 
C7 C8 H8B 110.1 . . ? 
H8A C8 H8B 108.5 . . ? 
C4 C9 H9A 109.5 . . ? 
C4 C9 H9B 109.5 . . ? 
H9A C9 H9B 109.5 . . ? 
C4 C9 H9C 109.5 . . ? 
H9A C9 H9C 109.5 . . ? 
H9B C9 H9C 109.5 . . ? 
C11 C10 C1 117.38(14) . . ? 
C11 C10 H10A 108.0 . . ? 
C1 C10 H10A 108.0 . . ? 
C11 C10 H10B 108.0 . . ? 
C1 C10 H10B 108.0 . . ? 
H10A C10 H10B 107.2 . . ? 
C16 C11 C12 117.99(15) . . ? 
C16 C11 C10 119.18(15) . . ? 
C12 C11 C10 122.78(15) . . ? 
C13 C12 C11 120.91(16) . . ? 
C13 C12 H12 119.5 . . ? 
C11 C12 H12 119.5 . . ? 
C12 C13 C14 120.30(16) . . ? 
C12 C13 H13 119.8 . . ? 
C14 C13 H13 119.8 . . ? 
C15 C14 C13 119.44(16) . . ? 
C15 C14 H14 120.3 . . ? 
C13 C14 H14 120.3 . . ? 
C14 C15 C16 120.12(16) . . ? 
C14 C15 H15 119.9 . . ? 
C16 C15 H15 119.9 . . ? 
C15 C16 C11 121.21(17) . . ? 
C15 C16 H16 119.4 . . ? 
C11 C16 H16 119.4 . . ? 
 
loop_ 
 _geom_torsion_atom_site_label_1 
 _geom_torsion_atom_site_label_2 
 _geom_torsion_atom_site_label_3 
 _geom_torsion_atom_site_label_4 
 _geom_torsion 
 _geom_torsion_site_symmetry_1 
 _geom_torsion_site_symmetry_2 
 _geom_torsion_site_symmetry_3 
 _geom_torsion_site_symmetry_4 
 _geom_torsion_publ_flag 
C10 C1 C2 O1 -1.1(2) . . . . ? 
C6 C1 C2 O1 -124.96(17) . . . . ? 
C7 C1 C2 O1 123.28(16) . . . . ? 
C10 C1 C2 N3 179.34(14) . . . . ? 
C6 C1 C2 N3 55.48(17) . . . . ? 
C7 C1 C2 N3 -56.28(17) . . . . ? 
O1 C2 N3 C4 177.92(15) . . . . ? 
C1 C2 N3 C4 -2.5(2) . . . . ? 
C2 N3 C4 N5 -51.73(18) . . . . ? 
C2 N3 C4 C9 -171.56(14) . . . . ? 
C2 N3 C4 C8 62.75(18) . . . . ? 
N3 C4 N5 C6 54.03(18) . . . . ? 
C9 C4 N5 C6 173.63(14) . . . . ? 
C8 C4 N5 C6 -59.55(18) . . . . ? 
C4 N5 C6 O6 178.53(15) . . . . ? 
C4 N5 C6 C1 -1.1(2) . . . . ? 
C10 C1 C6 O6 4.9(2) . . . . ? 
C2 C1 C6 O6 127.27(17) . . . . ? 
C7 C1 C6 O6 -121.07(17) . . . . ? 
C10 C1 C6 N5 -175.48(13) . . . . ? 
C2 C1 C6 N5 -53.08(17) . . . . ? 
C7 C1 C6 N5 58.58(16) . . . . ? 
C10 C1 C7 C8 178.13(14) . . . . ? 
C2 C1 C7 C8 55.50(17) . . . . ? 
C6 C1 C7 C8 -56.22(17) . . . . ? 
N5 C4 C8 C7 56.16(16) . . . . ? 
N3 C4 C8 C7 -57.15(17) . . . . ? 
C9 C4 C8 C7 -179.76(14) . . . . ? 
C1 C7 C8 C4 0.06(18) . . . . ? 
C2 C1 C10 C11 153.30(15) . . . . ? 
C6 C1 C10 C11 -87.48(19) . . . . ? 
C7 C1 C10 C11 33.9(2) . . . . ? 
C1 C10 C11 C16 -115.95(17) . . . . ? 
C1 C10 C11 C12 66.6(2) . . . . ? 
C16 C11 C12 C13 -1.4(2) . . . . ? 
C10 C11 C12 C13 176.07(16) . . . . ? 
C11 C12 C13 C14 0.7(3) . . . . ? 
C12 C13 C14 C15 0.7(3) . . . . ? 
C13 C14 C15 C16 -1.4(3) . . . . ? 
C14 C15 C16 C11 0.7(3) . . . . ? 
C12 C11 C16 C15 0.6(2) . . . . ? 
C10 C11 C16 C15 -176.89(16) . . . . ? 
 
_diffrn_measured_fraction_theta_max    1.000 
_diffrn_reflns_theta_full              24.99 
_diffrn_measured_fraction_theta_full   1.000 
_refine_diff_density_max     .224 
_refine_diff_density_min    -.208 
_refine_diff_density_rms     .043 

#===END

 
data_2k 
 
_audit_creation_method            SHELXL-97 
_chemical_name_systematic 
; 
 ? 
; 
_chemical_name_common             ? 
_chemical_melting_point           ? 
_chemical_formula_moiety          ? 
_chemical_formula_sum 
 'C14 H16 N2 O2' 
_chemical_formula_weight          244.29 
 
loop_ 
 _atom_type_symbol 
 _atom_type_description 
 _atom_type_scat_dispersion_real 
 _atom_type_scat_dispersion_imag 
 _atom_type_scat_source 
 'C'  'C'   0.0033   0.0016 
 'International Tables Vol C Tables 4.2.6.8 and 6.1.1.4' 
 'H'  'H'   0.0000   0.0000 
 'International Tables Vol C Tables 4.2.6.8 and 6.1.1.4' 
 'N'  'N'   0.0061   0.0033 
 'International Tables Vol C Tables 4.2.6.8 and 6.1.1.4' 
 'O'  'O'   0.0106   0.0060 
 'International Tables Vol C Tables 4.2.6.8 and 6.1.1.4' 
 
_symmetry_cell_setting            triclinic
_symmetry_space_group_name_H-M    'P -1'
 
loop_ 
 _symmetry_equiv_pos_as_xyz 
 'x, y, z' 
 '-x, -y, -z' 
 
_cell_length_a                    10.5250(3) 
_cell_length_b                    10.6020(3) 
_cell_length_c                    11.5520(3) 
_cell_angle_alpha                 98.2850(11) 
_cell_angle_beta                  91.3030(11) 
_cell_angle_gamma                 109.8320(12) 
_cell_volume                      1196.38(6) 
_cell_formula_units_Z             4 
_cell_measurement_temperature     90.0(2) 
_cell_measurement_reflns_used     4911
_cell_measurement_theta_min       1.00
_cell_measurement_theta_max       27.48
 
_exptl_crystal_description        block
_exptl_crystal_colour             colourless
_exptl_crystal_size_max           0.40 
_exptl_crystal_size_mid           0.18 
_exptl_crystal_size_min           0.18 
_exptl_crystal_density_meas       ? 
_exptl_crystal_density_diffrn     1.356 
_exptl_crystal_density_method     'not measured' 
_exptl_crystal_F_000              520 
_exptl_absorpt_coefficient_mu     0.092 
_exptl_absorpt_correction_type    none
_exptl_absorpt_correction_T_min   ? 
_exptl_absorpt_correction_T_max   ? 
_exptl_absorpt_process_details    ? 
 
_exptl_special_details 
; 
 ? 
; 
 
_diffrn_ambient_temperature       90.0(2) 
_diffrn_radiation_wavelength      0.71073 
_diffrn_radiation_type            MoK\a 
_diffrn_radiation_source          'fine-focus sealed tube' 
_diffrn_radiation_monochromator   graphite 
_diffrn_measurement_device_type   'Nonius KappaCCD diffractometer' 
_diffrn_measurement_method        '\w scans at fixed \c = 55\%'
_diffrn_detector_area_resol_mean  18 
_diffrn_standards_number          ?
_diffrn_standards_interval_count  ? 
_diffrn_standards_interval_time   ? 
_diffrn_standards_decay_%         <1
_diffrn_reflns_number             9294 
_diffrn_reflns_av_R_equivalents   0.0486 
_diffrn_reflns_av_sigmaI/netI     0.1028 
_diffrn_reflns_limit_h_min        -13 
_diffrn_reflns_limit_h_max        13 
_diffrn_reflns_limit_k_min        -13 
_diffrn_reflns_limit_k_max        13 
_diffrn_reflns_limit_l_min        -13 
_diffrn_reflns_limit_l_max        15 
_diffrn_reflns_theta_min          1.79 
_diffrn_reflns_theta_max          27.49 
_reflns_number_total              5483 
_reflns_number_gt                 3222 
_reflns_threshold_expression      >2sigma(I) 
 
_computing_data_collection        'COLLECT (Nonius, 1998)' 
_computing_cell_refinement        'SCALEPACK (Otwinowski & Minor, 1997)'
_computing_data_reduction         'DENZO-SMN (Otwinowski & Minor, 1997)'
_computing_structure_solution     'SHELXS-97 (Sheldrick, 1990)' 
_computing_structure_refinement   'SHELXL-97 (Sheldrick, 1997)' 
_computing_molecular_graphics     'XP in Siemens SHELXTL (Sheldrick, 1994)'
_computing_publication_material   
;
SHELX97-2 (Sheldrick, 1997) and local procedures
;
 
_refine_special_details 
; 
 Refinement of F^2^ against ALL reflections.  The weighted R-factor wR and 
 goodness of fit S are based on F^2^, conventional R-factors R are based 
 on F, with F set to zero for negative F^2^. The threshold expression of 
 F^2^ > 2sigma(F^2^) is used only for calculating R-factors(gt) etc. and is 
 not relevant to the choice of reflections for refinement.  R-factors based 
 on F^2^ are statistically about twice as large as those based on F, and R- 
 factors based on ALL data will be even larger. 
; 
 
_refine_ls_structure_factor_coef  Fsqd  
_refine_ls_matrix_type            full 
_refine_ls_weighting_scheme       calc  
_refine_ls_weighting_details 
 'calc w=1/[\s^2^(Fo^2^)+(0.0530P)^2^+0.0000P] where P=(Fo^2^+2Fc^2^)/3' 
_atom_sites_solution_primary      direct 
_atom_sites_solution_secondary    difmap 
_atom_sites_solution_hydrogens    geom 
_refine_ls_hydrogen_treatment     mixed 
_refine_ls_extinction_method      SHELXL 
_refine_ls_extinction_coef        0.0057(17) 
_refine_ls_extinction_expression 
 'Fc^*^=kFc[1+0.001xFc^2^\l^3^/sin(2\q)]^-1/4^' 
_refine_ls_number_reflns          5483 
_refine_ls_number_parameters      328 
_refine_ls_number_restraints      0 
_refine_ls_R_factor_all           0.1104 
_refine_ls_R_factor_gt            0.0484 
_refine_ls_wR_factor_ref          0.1168 
_refine_ls_wR_factor_gt           0.0974 
_refine_ls_goodness_of_fit_ref    0.948 
_refine_ls_restrained_S_all       0.948 
_refine_ls_shift/su_max           0.007 
_refine_ls_shift/su_mean          0.001 
 
loop_ 
 _atom_site_label 
 _atom_site_type_symbol 
 _atom_site_fract_x 
 _atom_site_fract_y 
 _atom_site_fract_z 
 _atom_site_U_iso_or_equiv 
 _atom_site_adp_type 
 _atom_site_occupancy 
 _atom_site_symmetry_multiplicity 
 _atom_site_calc_flag 
 _atom_site_refinement_flags 
 _atom_site_disorder_assembly 
 _atom_site_disorder_group 
C1A C 0.51361(18) 0.08416(18) 0.81783(16) 0.0136(4) Uani 1 1 d . . . 
O2A O 0.40126(12) -0.16429(12) 0.78799(10) 0.0165(3) Uani 1 1 d . . . 
C2A C 0.49861(19) -0.06468(19) 0.77200(16) 0.0139(4) Uani 1 1 d . . . 
N3A N 0.60662(15) -0.07151(15) 0.71628(13) 0.0148(4) Uani 1 1 d . . . 
H3A H 0.6110 -0.1499 0.6831 0.018 Uiso 1 1 calc R . . 
C4A C 0.71765(19) 0.05678(18) 0.71265(16) 0.0149(4) Uani 1 1 d . . . 
N5A N 0.65814(15) 0.14515(15) 0.66357(13) 0.0162(4) Uani 1 1 d . . . 
H5A H 0.6917 0.1856 0.6041 0.019 Uiso 1 1 calc R . . 
O6A O 0.48909(13) 0.23334(13) 0.68166(11) 0.0194(3) Uani 1 1 d . . . 
C6A C 0.54985(19) 0.16190(18) 0.71337(16) 0.0141(4) Uani 1 1 d . . . 
C7A C 0.64567(18) 0.14203(19) 0.90322(16) 0.0169(5) Uani 1 1 d . . . 
H7A1 H 0.6657 0.2401 0.9308 0.020 Uiso 1 1 calc R . . 
H7A2 H 0.6314 0.0952 0.9725 0.020 Uiso 1 1 calc R . . 
C8A C 0.76635(19) 0.12147(19) 0.84073(16) 0.0179(5) Uani 1 1 d . . . 
H8A1 H 0.8403 0.2099 0.8438 0.021 Uiso 1 1 calc R . . 
H8A2 H 0.8013 0.0615 0.8800 0.021 Uiso 1 1 calc R . . 
C9A C 0.82870(19) 0.03315(19) 0.64066(16) 0.0171(5) Uani 1 1 d . . . 
H9A1 H 0.8544 -0.0393 0.6691 0.020 Uiso 1 1 calc R . . 
H9A2 H 0.9093 0.1173 0.6545 0.020 Uiso 1 1 calc R . . 
C10A C 0.7912(2) -0.0070(2) 0.50905(17) 0.0210(5) Uani 1 1 d . . . 
H10A H 0.7082 -0.0870 0.4943 0.032 Uiso 1 1 calc R . . 
H10B H 0.8650 -0.0282 0.4703 0.032 Uiso 1 1 calc R . . 
H10C H 0.7762 0.0685 0.4779 0.032 Uiso 1 1 calc R . . 
C11A C 0.38822(19) 0.09979(18) 0.87182(16) 0.0151(4) Uani 1 1 d . . . 
C12A C 0.3941(2) 0.17442(18) 0.98196(16) 0.0171(5) Uani 1 1 d . . . 
H12A H 0.4784 0.2141 1.0275 0.020 Uiso 1 1 calc R . . 
C13A C 0.2790(2) 0.19228(19) 1.02690(17) 0.0207(5) Uani 1 1 d . . . 
H13A H 0.2854 0.2451 1.1020 0.025 Uiso 1 1 calc R . . 
C14A C 0.1556(2) 0.1337(2) 0.96288(18) 0.0234(5) Uani 1 1 d . . . 
H14A H 0.0767 0.1456 0.9935 0.028 Uiso 1 1 calc R . . 
C15A C 0.1478(2) 0.0573(2) 0.85356(18) 0.0222(5) Uani 1 1 d . . . 
H15A H 0.0628 0.0159 0.8093 0.027 Uiso 1 1 calc R . . 
C16A C 0.2625(2) 0.04063(19) 0.80807(17) 0.0188(5) Uani 1 1 d . . . 
H16A H 0.2557 -0.0117 0.7326 0.023 Uiso 1 1 calc R . . 
C1B C 0.81028(18) 0.57534(18) 0.53709(16) 0.0131(4) Uani 1 1 d . . . 
O2B O 0.77410(13) 0.33033(12) 0.50727(11) 0.0168(3) Uani 1 1 d . . . 
C2B C 0.75792(18) 0.42810(19) 0.47019(16) 0.0136(4) Uani 1 1 d . . . 
N3B N 0.69688(15) 0.42142(15) 0.36585(13) 0.0150(4) Uani 1 1 d . . . 
H3B H 0.6623 0.3437 0.3178 0.018 Uiso 1 1 calc R . . 
C4B C 0.68920(19) 0.54730(18) 0.33387(16) 0.0141(4) Uani 1 1 d . . . 
N5B N 0.63022(15) 0.60825(15) 0.43112(13) 0.0152(4) Uani 1 1 d . . . 
H5B H 0.5583 0.6306 0.4190 0.018 Uiso 1 1 calc R . . 
O6B O 0.66103(13) 0.68863(13) 0.62841(11) 0.0177(3) Uani 1 1 d . . . 
C6B C 0.69055(19) 0.62852(18) 0.53933(17) 0.0147(4) Uani 1 1 d . . . 
C7B C 0.90771(19) 0.66249(19) 0.45496(16) 0.0170(5) Uani 1 1 d . . . 
H7B1 H 0.9382 0.7597 0.4904 0.020 Uiso 1 1 calc R . . 
H7B2 H 0.9887 0.6353 0.4473 0.020 Uiso 1 1 calc R . . 
C8B C 0.83606(19) 0.64301(19) 0.33271(16) 0.0169(5) Uani 1 1 d . . . 
H8B1 H 0.8374 0.7317 0.3140 0.020 Uiso 1 1 calc R . . 
H8B2 H 0.8830 0.6033 0.2724 0.020 Uiso 1 1 calc R . . 
C9B C 0.6015(2) 0.5201(2) 0.22017(16) 0.0184(5) Uani 1 1 d . . . 
H9B1 H 0.5790 0.6021 0.2125 0.022 Uiso 1 1 calc R . . 
H9B2 H 0.5156 0.4450 0.2245 0.022 Uiso 1 1 calc R . . 
C10B C 0.6685(2) 0.4832(2) 0.11098(16) 0.0213(5) Uani 1 1 d . . . 
H10D H 0.7490 0.5606 0.1016 0.032 Uiso 1 1 calc R . . 
H10E H 0.6045 0.4607 0.0419 0.032 Uiso 1 1 calc R . . 
H10F H 0.6951 0.4047 0.1193 0.032 Uiso 1 1 calc R . . 
C11B C 0.87333(19) 0.58697(18) 0.65900(16) 0.0138(4) Uani 1 1 d . . . 
C12B C 1.00531(19) 0.67220(19) 0.69589(16) 0.0158(4) Uani 1 1 d . . . 
H12B H 1.0592 0.7247 0.6431 0.019 Uiso 1 1 calc R . . 
C13B C 1.05924(19) 0.68131(19) 0.80924(17) 0.0182(5) Uani 1 1 d . . . 
H13B H 1.1493 0.7402 0.8335 0.022 Uiso 1 1 calc R . . 
C14B C 0.9821(2) 0.60492(19) 0.88635(17) 0.0187(5) Uani 1 1 d . . . 
H14B H 1.0188 0.6110 0.9637 0.022 Uiso 1 1 calc R . . 
C15B C 0.8511(2) 0.51958(19) 0.85070(17) 0.0199(5) Uani 1 1 d . . . 
H15B H 0.7981 0.4666 0.9037 0.024 Uiso 1 1 calc R . . 
C16B C 0.79658(19) 0.51073(19) 0.73879(16) 0.0160(4) Uani 1 1 d . . . 
H16B H 0.7061 0.4523 0.7156 0.019 Uiso 1 1 calc R . . 
 
loop_ 
 _atom_site_aniso_label 
 _atom_site_aniso_U_11 
 _atom_site_aniso_U_22 
 _atom_site_aniso_U_33 
 _atom_site_aniso_U_23 
 _atom_site_aniso_U_13 
 _atom_site_aniso_U_12 
C1A 0.0155(11) 0.0122(10) 0.0134(10) 0.0022(8) 0.0007(8) 0.0052(8) 
O2A 0.0176(8) 0.0129(7) 0.0165(8) 0.0019(6) 0.0019(6) 0.0020(6) 
C2A 0.0172(11) 0.0152(10) 0.0108(10) 0.0016(8) -0.0011(8) 0.0079(9) 
N3A 0.0172(9) 0.0095(8) 0.0183(9) 0.0009(7) 0.0030(7) 0.0058(7) 
C4A 0.0169(11) 0.0138(10) 0.0142(11) 0.0028(8) 0.0008(8) 0.0050(9) 
N5A 0.0204(10) 0.0174(9) 0.0147(9) 0.0072(7) 0.0051(7) 0.0094(8) 
O6A 0.0223(8) 0.0181(7) 0.0212(8) 0.0062(6) 0.0020(6) 0.0101(6) 
C6A 0.0153(11) 0.0099(10) 0.0146(11) -0.0013(8) -0.0003(8) 0.0026(8) 
C7A 0.0203(11) 0.0152(10) 0.0142(11) 0.0019(8) 0.0011(9) 0.0051(9) 
C8A 0.0187(11) 0.0182(11) 0.0169(11) 0.0028(9) 0.0004(9) 0.0068(9) 
C9A 0.0176(11) 0.0140(10) 0.0204(11) 0.0037(8) 0.0038(9) 0.0059(9) 
C10A 0.0229(12) 0.0213(11) 0.0208(12) 0.0042(9) 0.0054(9) 0.0096(10) 
C11A 0.0185(11) 0.0126(10) 0.0160(11) 0.0058(8) 0.0032(9) 0.0061(9) 
C12A 0.0190(11) 0.0129(10) 0.0182(11) 0.0037(9) 0.0009(9) 0.0037(9) 
C13A 0.0276(13) 0.0169(11) 0.0187(11) 0.0012(9) 0.0060(10) 0.0098(10) 
C14A 0.0236(12) 0.0228(12) 0.0295(13) 0.0082(10) 0.0108(10) 0.0132(10) 
C15A 0.0190(12) 0.0245(12) 0.0245(12) 0.0057(10) 0.0013(9) 0.0087(10) 
C16A 0.0219(12) 0.0193(11) 0.0151(11) 0.0016(9) 0.0000(9) 0.0078(9) 
C1B 0.0133(10) 0.0139(10) 0.0132(10) 0.0040(8) 0.0042(8) 0.0053(8) 
O2B 0.0215(8) 0.0127(7) 0.0189(8) 0.0049(6) 0.0046(6) 0.0083(6) 
C2B 0.0117(10) 0.0147(10) 0.0149(11) 0.0024(8) 0.0048(8) 0.0052(8) 
N3B 0.0188(9) 0.0095(8) 0.0154(9) -0.0007(7) -0.0015(7) 0.0045(7) 
C4B 0.0179(11) 0.0110(10) 0.0138(10) 0.0010(8) 0.0010(8) 0.0058(8) 
N5B 0.0165(9) 0.0185(9) 0.0143(9) 0.0031(7) 0.0017(7) 0.0105(7) 
O6B 0.0217(8) 0.0154(7) 0.0176(8) 0.0003(6) 0.0039(6) 0.0093(6) 
C6B 0.0145(11) 0.0096(10) 0.0183(12) 0.0024(8) 0.0017(9) 0.0019(8) 
C7B 0.0171(11) 0.0154(10) 0.0176(11) 0.0039(8) 0.0046(8) 0.0040(9) 
C8B 0.0203(11) 0.0162(11) 0.0145(11) 0.0035(8) 0.0031(9) 0.0062(9) 
C9B 0.0220(11) 0.0172(11) 0.0171(11) 0.0024(8) 0.0003(9) 0.0084(9) 
C10B 0.0249(12) 0.0203(11) 0.0174(11) 0.0018(9) 0.0007(9) 0.0067(10) 
C11B 0.0169(11) 0.0106(10) 0.0158(11) 0.0013(8) 0.0032(8) 0.0075(9) 
C12B 0.0165(11) 0.0147(10) 0.0169(11) 0.0037(8) 0.0041(9) 0.0056(9) 
C13B 0.0152(11) 0.0195(11) 0.0190(12) 0.0007(9) -0.0020(9) 0.0060(9) 
C14B 0.0253(12) 0.0195(11) 0.0120(11) 0.0000(9) -0.0030(9) 0.0102(10) 
C15B 0.0285(13) 0.0166(11) 0.0152(11) 0.0041(9) 0.0036(9) 0.0078(10) 
C16B 0.0155(11) 0.0134(10) 0.0177(11) 0.0012(8) 0.0012(9) 0.0040(9) 
 
_geom_special_details 
; 
 All esds (except the esd in the dihedral angle between two l.s. planes) 
 are estimated using the full covariance matrix.  The cell esds are taken 
 into account individually in the estimation of esds in distances, angles 
 and torsion angles; correlations between esds in cell parameters are only 
 used when they are defined by crystal symmetry.  An approximate (isotropic) 
 treatment of cell esds is used for estimating esds involving l.s. planes. 
; 
 
loop_ 
 _geom_bond_atom_site_label_1 
 _geom_bond_atom_site_label_2 
 _geom_bond_distance 
 _geom_bond_site_symmetry_2 
 _geom_bond_publ_flag 
C1A C11A 1.521(3) . ? 
C1A C6A 1.541(3) . ? 
C1A C2A 1.543(3) . ? 
C1A C7A 1.570(3) . ? 
O2A C2A 1.237(2) . ? 
C2A N3A 1.337(2) . ? 
N3A C4A 1.469(2) . ? 
N3A H3A 0.8800 . ? 
C4A N5A 1.458(2) . ? 
C4A C9A 1.518(2) . ? 
C4A C8A 1.535(2) . ? 
N5A C6A 1.341(2) . ? 
N5A H5A 0.8800 . ? 
O6A C6A 1.231(2) . ? 
C7A C8A 1.538(2) . ? 
C7A H7A1 0.9900 . ? 
C7A H7A2 0.9900 . ? 
C8A H8A1 0.9900 . ? 
C8A H8A2 0.9900 . ? 
C9A C10A 1.523(3) . ? 
C9A H9A1 0.9900 . ? 
C9A H9A2 0.9900 . ? 
C10A H10A 0.9800 . ? 
C10A H10B 0.9800 . ? 
C10A H10C 0.9800 . ? 
C11A C12A 1.386(3) . ? 
C11A C16A 1.395(3) . ? 
C12A C13A 1.389(3) . ? 
C12A H12A 0.9500 . ? 
C13A C14A 1.377(3) . ? 
C13A H13A 0.9500 . ? 
C14A C15A 1.383(3) . ? 
C14A H14A 0.9500 . ? 
C15A C16A 1.383(3) . ? 
C15A H15A 0.9500 . ? 
C16A H16A 0.9500 . ? 
C1B C11B 1.513(3) . ? 
C1B C2B 1.545(2) . ? 
C1B C6B 1.545(3) . ? 
C1B C7B 1.568(2) . ? 
O2B C2B 1.238(2) . ? 
C2B N3B 1.334(2) . ? 
N3B C4B 1.462(2) . ? 
N3B H3B 0.8800 . ? 
C4B N5B 1.470(2) . ? 
C4B C9B 1.521(3) . ? 
C4B C8B 1.536(3) . ? 
N5B C6B 1.344(2) . ? 
N5B H5B 0.8800 . ? 
O6B C6B 1.233(2) . ? 
C7B C8B 1.539(3) . ? 
C7B H7B1 0.9900 . ? 
C7B H7B2 0.9900 . ? 
C8B H8B1 0.9900 . ? 
C8B H8B2 0.9900 . ? 
C9B C10B 1.525(2) . ? 
C9B H9B1 0.9900 . ? 
C9B H9B2 0.9900 . ? 
C10B H10D 0.9800 . ? 
C10B H10E 0.9800 . ? 
C10B H10F 0.9800 . ? 
C11B C12B 1.392(3) . ? 
C11B C16B 1.400(2) . ? 
C12B C13B 1.392(3) . ? 
C12B H12B 0.9500 . ? 
C13B C14B 1.380(3) . ? 
C13B H13B 0.9500 . ? 
C14B C15B 1.382(3) . ? 
C14B H14B 0.9500 . ? 
C15B C16B 1.380(3) . ? 
C15B H15B 0.9500 . ? 
C16B H16B 0.9500 . ? 
 
loop_ 
 _geom_angle_atom_site_label_1 
 _geom_angle_atom_site_label_2 
 _geom_angle_atom_site_label_3 
 _geom_angle 
 _geom_angle_site_symmetry_1 
 _geom_angle_site_symmetry_3 
 _geom_angle_publ_flag 
C11A C1A C6A 111.48(15) . . ? 
C11A C1A C2A 113.61(15) . . ? 
C6A C1A C2A 106.74(14) . . ? 
C11A C1A C7A 114.47(15) . . ? 
C6A C1A C7A 104.44(14) . . ? 
C2A C1A C7A 105.35(15) . . ? 
O2A C2A N3A 124.67(17) . . ? 
O2A C2A C1A 124.28(16) . . ? 
N3A C2A C1A 111.01(16) . . ? 
C2A N3A C4A 117.44(15) . . ? 
C2A N3A H3A 121.3 . . ? 
C4A N3A H3A 121.3 . . ? 
N5A C4A N3A 106.69(15) . . ? 
N5A C4A C9A 111.89(15) . . ? 
N3A C4A C9A 111.16(15) . . ? 
N5A C4A C8A 106.89(15) . . ? 
N3A C4A C8A 106.40(14) . . ? 
C9A C4A C8A 113.41(16) . . ? 
C6A N5A C4A 116.88(15) . . ? 
C6A N5A H5A 121.6 . . ? 
C4A N5A H5A 121.6 . . ? 
O6A C6A N5A 124.26(17) . . ? 
O6A C6A C1A 124.12(16) . . ? 
N5A C6A C1A 111.59(16) . . ? 
C8A C7A C1A 110.53(14) . . ? 
C8A C7A H7A1 109.5 . . ? 
C1A C7A H7A1 109.5 . . ? 
C8A C7A H7A2 109.5 . . ? 
C1A C7A H7A2 109.5 . . ? 
H7A1 C7A H7A2 108.1 . . ? 
C4A C8A C7A 108.28(15) . . ? 
C4A C8A H8A1 110.0 . . ? 
C7A C8A H8A1 110.0 . . ? 
C4A C8A H8A2 110.0 . . ? 
C7A C8A H8A2 110.0 . . ? 
H8A1 C8A H8A2 108.4 . . ? 
C4A C9A C10A 114.84(16) . . ? 
C4A C9A H9A1 108.6 . . ? 
C10A C9A H9A1 108.6 . . ? 
C4A C9A H9A2 108.6 . . ? 
C10A C9A H9A2 108.6 . . ? 
H9A1 C9A H9A2 107.5 . . ? 
C9A C10A H10A 109.5 . . ? 
C9A C10A H10B 109.5 . . ? 
H10A C10A H10B 109.5 . . ? 
C9A C10A H10C 109.5 . . ? 
H10A C10A H10C 109.5 . . ? 
H10B C10A H10C 109.5 . . ? 
C12A C11A C16A 118.04(18) . . ? 
C12A C11A C1A 122.37(17) . . ? 
C16A C11A C1A 119.56(17) . . ? 
C11A C12A C13A 121.17(19) . . ? 
C11A C12A H12A 119.4 . . ? 
C13A C12A H12A 119.4 . . ? 
C14A C13A C12A 120.19(18) . . ? 
C14A C13A H13A 119.9 . . ? 
C12A C13A H13A 119.9 . . ? 
C13A C14A C15A 119.30(19) . . ? 
C13A C14A H14A 120.3 . . ? 
C15A C14A H14A 120.3 . . ? 
C16A C15A C14A 120.6(2) . . ? 
C16A C15A H15A 119.7 . . ? 
C14A C15A H15A 119.7 . . ? 
C15A C16A C11A 120.67(18) . . ? 
C15A C16A H16A 119.7 . . ? 
C11A C16A H16A 119.7 . . ? 
C11B C1B C2B 112.97(15) . . ? 
C11B C1B C6B 112.10(15) . . ? 
C2B C1B C6B 107.58(15) . . ? 
C11B C1B C7B 114.44(15) . . ? 
C2B C1B C7B 105.87(14) . . ? 
C6B C1B C7B 103.15(14) . . ? 
O2B C2B N3B 124.66(17) . . ? 
O2B C2B C1B 124.35(17) . . ? 
N3B C2B C1B 110.96(16) . . ? 
C2B N3B C4B 117.88(15) . . ? 
C2B N3B H3B 121.1 . . ? 
C4B N3B H3B 121.1 . . ? 
N3B C4B N5B 106.53(14) . . ? 
N3B C4B C9B 111.42(15) . . ? 
N5B C4B C9B 110.23(15) . . ? 
N3B C4B C8B 106.33(15) . . ? 
N5B C4B C8B 106.65(14) . . ? 
C9B C4B C8B 115.19(15) . . ? 
C6B N5B C4B 117.28(16) . . ? 
C6B N5B H5B 121.4 . . ? 
C4B N5B H5B 121.4 . . ? 
O6B C6B N5B 125.33(18) . . ? 
O6B C6B C1B 123.55(17) . . ? 
N5B C6B C1B 110.98(16) . . ? 
C8B C7B C1B 110.89(15) . . ? 
C8B C7B H7B1 109.5 . . ? 
C1B C7B H7B1 109.5 . . ? 
C8B C7B H7B2 109.5 . . ? 
C1B C7B H7B2 109.5 . . ? 
H7B1 C7B H7B2 108.0 . . ? 
C4B C8B C7B 108.07(14) . . ? 
C4B C8B H8B1 110.1 . . ? 
C7B C8B H8B1 110.1 . . ? 
C4B C8B H8B2 110.1 . . ? 
C7B C8B H8B2 110.1 . . ? 
H8B1 C8B H8B2 108.4 . . ? 
C4B C9B C10B 113.72(16) . . ? 
C4B C9B H9B1 108.8 . . ? 
C10B C9B H9B1 108.8 . . ? 
C4B C9B H9B2 108.8 . . ? 
C10B C9B H9B2 108.8 . . ? 
H9B1 C9B H9B2 107.7 . . ? 
C9B C10B H10D 109.5 . . ? 
C9B C10B H10E 109.5 . . ? 
H10D C10B H10E 109.5 . . ? 
C9B C10B H10F 109.5 . . ? 
H10D C10B H10F 109.5 . . ? 
H10E C10B H10F 109.5 . . ? 
C12B C11B C16B 118.25(17) . . ? 
C12B C11B C1B 122.43(16) . . ? 
C16B C11B C1B 119.32(16) . . ? 
C13B C12B C11B 120.75(17) . . ? 
C13B C12B H12B 119.6 . . ? 
C11B C12B H12B 119.6 . . ? 
C14B C13B C12B 120.08(18) . . ? 
C14B C13B H13B 120.0 . . ? 
C12B C13B H13B 120.0 . . ? 
C13B C14B C15B 119.75(18) . . ? 
C13B C14B H14B 120.1 . . ? 
C15B C14B H14B 120.1 . . ? 
C16B C15B C14B 120.51(18) . . ? 
C16B C15B H15B 119.7 . . ? 
C14B C15B H15B 119.7 . . ? 
C15B C16B C11B 120.66(18) . . ? 
C15B C16B H16B 119.7 . . ? 
C11B C16B H16B 119.7 . . ? 
 
loop_ 
 _geom_torsion_atom_site_label_1 
 _geom_torsion_atom_site_label_2 
 _geom_torsion_atom_site_label_3 
 _geom_torsion_atom_site_label_4 
 _geom_torsion 
 _geom_torsion_site_symmetry_1 
 _geom_torsion_site_symmetry_2 
 _geom_torsion_site_symmetry_3 
 _geom_torsion_site_symmetry_4 
 _geom_torsion_publ_flag 
C11A C1A C2A O2A -7.6(3) . . . . ? 
C6A C1A C2A O2A -130.88(18) . . . . ? 
C7A C1A C2A O2A 118.48(19) . . . . ? 
C11A C1A C2A N3A 174.44(15) . . . . ? 
C6A C1A C2A N3A 51.15(19) . . . . ? 
C7A C1A C2A N3A -59.49(18) . . . . ? 
O2A C2A N3A C4A -175.64(17) . . . . ? 
C1A C2A N3A C4A 2.3(2) . . . . ? 
C2A N3A C4A N5A -54.5(2) . . . . ? 
C2A N3A C4A C9A -176.70(16) . . . . ? 
C2A N3A C4A C8A 59.4(2) . . . . ? 
N3A C4A N5A C6A 51.7(2) . . . . ? 
C9A C4A N5A C6A 173.49(16) . . . . ? 
C8A C4A N5A C6A -61.8(2) . . . . ? 
C4A N5A C6A O6A 179.91(17) . . . . ? 
C4A N5A C6A C1A 1.7(2) . . . . ? 
C11A C1A C6A O6A 3.5(3) . . . . ? 
C2A C1A C6A O6A 128.13(19) . . . . ? 
C7A C1A C6A O6A -120.59(19) . . . . ? 
C11A C1A C6A N5A -178.26(15) . . . . ? 
C2A C1A C6A N5A -53.67(19) . . . . ? 
C7A C1A C6A N5A 57.61(19) . . . . ? 
C11A C1A C7A C8A 179.99(15) . . . . ? 
C6A C1A C7A C8A -57.82(19) . . . . ? 
C2A C1A C7A C8A 54.46(19) . . . . ? 
N5A C4A C8A C7A 55.33(19) . . . . ? 
N3A C4A C8A C7A -58.38(19) . . . . ? 
C9A C4A C8A C7A 179.11(15) . . . . ? 
C1A C7A C8A C4A 2.8(2) . . . . ? 
N5A C4A C9A C10A -48.6(2) . . . . ? 
N3A C4A C9A C10A 70.6(2) . . . . ? 
C8A C4A C9A C10A -169.58(15) . . . . ? 
C6A C1A C11A C12A -110.32(19) . . . . ? 
C2A C1A C11A C12A 129.03(18) . . . . ? 
C7A C1A C11A C12A 7.9(3) . . . . ? 
C6A C1A C11A C16A 67.9(2) . . . . ? 
C2A C1A C11A C16A -52.8(2) . . . . ? 
C7A C1A C11A C16A -173.85(16) . . . . ? 
C16A C11A C12A C13A -1.3(3) . . . . ? 
C1A C11A C12A C13A 176.98(17) . . . . ? 
C11A C12A C13A C14A 1.1(3) . . . . ? 
C12A C13A C14A C15A -0.1(3) . . . . ? 
C13A C14A C15A C16A -0.6(3) . . . . ? 
C14A C15A C16A C11A 0.4(3) . . . . ? 
C12A C11A C16A C15A 0.5(3) . . . . ? 
C1A C11A C16A C15A -177.76(17) . . . . ? 
C11B C1B C2B O2B -5.2(2) . . . . ? 
C6B C1B C2B O2B -129.49(18) . . . . ? 
C7B C1B C2B O2B 120.75(19) . . . . ? 
C11B C1B C2B N3B 176.71(15) . . . . ? 
C6B C1B C2B N3B 52.46(19) . . . . ? 
C7B C1B C2B N3B -57.30(18) . . . . ? 
O2B C2B N3B C4B -178.38(16) . . . . ? 
C1B C2B N3B C4B -0.3(2) . . . . ? 
C2B N3B C4B N5B -52.4(2) . . . . ? 
C2B N3B C4B C9B -172.70(15) . . . . ? 
C2B N3B C4B C8B 61.04(19) . . . . ? 
N3B C4B N5B C6B 53.9(2) . . . . ? 
C9B C4B N5B C6B 174.96(15) . . . . ? 
C8B C4B N5B C6B -59.3(2) . . . . ? 
C4B N5B C6B O6B 173.55(16) . . . . ? 
C4B N5B C6B C1B -2.4(2) . . . . ? 
C11B C1B C6B O6B 8.4(2) . . . . ? 
C2B C1B C6B O6B 133.19(18) . . . . ? 
C7B C1B C6B O6B -115.18(18) . . . . ? 
C11B C1B C6B N5B -175.59(14) . . . . ? 
C2B C1B C6B N5B -50.81(19) . . . . ? 
C7B C1B C6B N5B 60.82(18) . . . . ? 
C11B C1B C7B C8B 179.21(15) . . . . ? 
C2B C1B C7B C8B 54.13(19) . . . . ? 
C6B C1B C7B C8B -58.75(19) . . . . ? 
N3B C4B C8B C7B -57.90(18) . . . . ? 
N5B C4B C8B C7B 55.50(19) . . . . ? 
C9B C4B C8B C7B 178.15(15) . . . . ? 
C1B C7B C8B C4B 2.1(2) . . . . ? 
N3B C4B C9B C10B -73.3(2) . . . . ? 
N5B C4B C9B C10B 168.61(15) . . . . ? 
C8B C4B C9B C10B 47.9(2) . . . . ? 
C2B C1B C11B C12B 123.58(18) . . . . ? 
C6B C1B C11B C12B -114.68(19) . . . . ? 
C7B C1B C11B C12B 2.3(2) . . . . ? 
C2B C1B C11B C16B -57.1(2) . . . . ? 
C6B C1B C11B C16B 64.6(2) . . . . ? 
C7B C1B C11B C16B -178.34(16) . . . . ? 
C16B C11B C12B C13B -0.1(3) . . . . ? 
C1B C11B C12B C13B 179.25(17) . . . . ? 
C11B C12B C13B C14B 0.3(3) . . . . ? 
C12B C13B C14B C15B -0.1(3) . . . . ? 
C13B C14B C15B C16B -0.4(3) . . . . ? 
C14B C15B C16B C11B 0.6(3) . . . . ? 
C12B C11B C16B C15B -0.4(3) . . . . ? 
C1B C11B C16B C15B -179.74(17) . . . . ? 
 
_diffrn_measured_fraction_theta_max    0.999 
_diffrn_reflns_theta_full              27.49 
_diffrn_measured_fraction_theta_full   0.999 
_refine_diff_density_max    0.280 
_refine_diff_density_min   -0.341 
_refine_diff_density_rms    0.061 

#===END
